# Supplementary material for: Identification and Characterization of Verticillium Nonalfalfae-responsive Micrornas in the Roots of Resistant and Susceptible Hop Cultivars
Source: Research Square preprint supplement (doi:10.21203/rs.3.rs-114355/v2), 2021-07-06
Supplement: Supplementary file 1 [file 654a247e31b362019617f132.xlsx]

## Sheet: Table S1
Table S1: Known miRNAs identified in Humulus lupulus. miRNAs were predicted in hop draft genome sequences obtained from HopBase using the miRNA prediction pipeline (miR-PREFeR), followed by alignment of predicted mature miRNA sequences with known miRNAs deposited in miRBase.
																			CER_Ctrl1				CER_Ctrl2				CER_Ctrl3				CER_Inoc1				CER_Inoc2				CER_Inoc3				WTR_Ctrl1				WTR_Ctrl2
miRNA ID	Seqid(chromosome)	start position	end position	strand	precursor sequence	MFE (kcal/mol)	G	C	A	U	Length of miRNA precursor	G+C	G+C %	AMFE %	MFEI	secondary structure	mature sequence	star sequence	reads mapped to precursor	reads mapped to mature	reads mapped to star	reads mapped to antisense region	reads mapped to precursor	reads mapped to mature	reads mapped to star	reads mapped to antisense region	reads mapped to precursor	reads mapped to mature	reads mapped to star	reads mapped to antisense region	reads mapped to precursor	reads mapped to mature	reads mapped to star	reads mapped to antisense region	reads mapped to precursor	reads mapped to mature	reads mapped to star	reads mapped to antisense region	reads mapped to precursor	reads mapped to mature	reads mapped to star	reads mapped to antisense region	reads mapped to precursor	reads mapped to mature	reads mapped to star	reads mapped to antisense region	reads mapped to precursor	reads mapped to mature	reads mapped to star
hlu-miR529	000015F	2551297	2551464	+	AUCAUCAAGACUAAUGGGAGAAGAGAGAGAGUACAGCUUUUUCUAUAACAUAUGCAUCAAGAUCAAGGCCUGAUCGUAUAUAUAUAUAUAUAUAUUCAGUUUCCCUCUUGAUGAGUUUGAUUAAGCUGUACCCUCUCUCUUCUCCUUCUUAUCUUUGAUGAAUACUG	-67.3	27	31	49	60	167	58	34.7305	-40.2994	-1.16034	.(((((((((.....((((((((((((((.(((((((((..((...(((.....((((((((....((.((((..(((((((....)))))))..))))...)).)))))))).))).))..))))))))).)))))))))))))).....)).)))))))......	AGAAGAGAGAGAGUACAGCUU	GCUGUACCCUCUCUCUUCUCC	1	1	0	0	3	3	0	0	2	0	2	0	1	1	0	0	6	5	1	0	1	1	0	0	4	2	1	0	1	0	1
hlu-miR171i	000043F	150912	151033	-	AAGGUAUUGGCGCGUCUCAAUCUAAAUACACGGCUAAGAGAGCAAUAUAUAUAAAAUUAGCCAAGUAAUUUGAUUGAGCCGCGUCAAUAUCUCCUUUAAUUACACUUUUCCAUCUCUCCAA	-38	18	26	40	37	121	44	36.3636	-31.405	-0.863636	.(((((((((((((.(((((((.((.(((..((((((...................))))))..))).)).))))))).))))))))))))).............................	UUGAGCCGCGUCAAUAUCUCC	AGGUAUUGGCGCGUCUCAAUC	738	695	9	2	398	379	3	0	585	546	12	1	477	449	6	0	554	524	8	0	262	239	5	0	817	768	14	0	475	444	9
hlu-miR394c	000048F	534630	534773	-	AGGGUUUCUCAGGGGCCUUGUUGCAGAUCCAGUUUGGCAUUCUGUCCGCCUCCAUUUUACUCUUUUUUAUGUAUUGGUACAUCGCAUUGGAGGCAGCCAGCAUGUCAAACUGACUCUGUAAAUUUCUCUCUGAGAAACUUGUA	-58.6	31	32	29	51	143	63	44.0559	-40.979	-0.930159	.((((((((((((((.....(((((((..(((((((((((.(((.(.(((((((..............(((((....))))).....))))))).).))).)))))))))))..))))))).....))))))))))))))...	UUUGGCAUUCUGUCCGCCUCC	AGGCAGCCAGCAUGUCAAACU	150	130	1	0	140	118	0	0	148	138	0	0	121	108	2	0	213	187	2	1	55	52	0	0	144	125	1	0	133	110	2
hlu-miR156a	000052F	866327	866514	+	UAGAGAGAGAGAUACGGUUUGGUUUUAUAUAAAUAUAUGGUUGAGGAGGCACGCUGAUGUUGUUGACAGAAGAUAGAGAGCACAGAUGACUAAAUGCAUAGCAGCAUCUCACUCCUUUGUGCUCUCUAUUCUUCUGUCAUCACCUCUAUCAGAUAUAAGGCAUGCCCUCUCUCUCUCUCUCUCCCUC	-73.7	38	42	48	59	187	80	42.7807	-39.4118	-0.92125	.(((((((((((...(((...(((((((((.......((((.((((.((((......))))..(((((((((((((((((((((((.((....((((......)))).....)).))))))))))))).))))))))))...)))).)))).)))))))))..)))...))))))))))).......	UUGACAGAAGAUAGAGAGCAC	GCUCUCUAUUCUUCUGUCAUCA	407	309	4	2	230	174	2	0	316	220	3	0	233	165	5	0	323	216	7	1	84	49	1	0	787	565	4	0	552	395	3
hlu-miR482a	000069F	1016654	1016902	+	AGGAACAAGAGGAAAAGGGAAUGAGUUUGCUGGAAGUUGUAGGUAUGGGGGGAUUGGGCAAAGCUAUAUCUAUACAUAUAUAUAUAUAUCCAUAUAUGUAUAAUCUAUAUCUAUAGAUCUAUAUAUGUAUAAUCUUUAUAUAUAUAUAUAUAUGAAAAAAAAAAUAGAAUAAUAGGAGCUUUUCCCAACACCUCCCAUACCAUUGAUUUCCAGGCCUUCUUCCCUUUUCCAUUCUCUGUUCCAUUUUU	-97.5	39	38	84	87	248	77	31.0484	-39.3145	-1.26623	.((((((((((((((((((((.(((....((((((((((..(((((((((((.(((((.((((((.(((((((.(((((((((((((((..(((((((((((((((((....)))))).))))))))))).........))))))))))))))).........)))))....))..)))))).)))))..)))))))))))..))))))))))..))).)))))))))))..))).))))))......	UUUUCCCAACACCUCCCAUACC	UAUGGGGGGAUUGGGCAAAGC	41098	34144	2039	5	22099	18379	1188	2	31906	26952	1225	0	17196	12328	2671	1	50443	42567	1207	1	9405	5876	1968	6	57369	46271	4244	0	27761	22685	2007
hlu-miR393c	000085F	183567	183723	+	AGGUGGAGACUUCCAAAGGGAUCGCAUUGAUCUAAUUAUAUUCGAUACUUGGUGAUGUUGAUGAUCAACAGUAGUGAUAAUUCUAAUAUUUGUUACUAUAUUUUAGUUCAUAUAAUUGGAUCAUGCAAUCCCUUGGGAAUUUUCCAUCGUAAGCUC	-56.9	30	23	45	58	156	53	33.9744	-36.4744	-1.07358	.((((((((.((((.(((((((.((((.(((((((((((((..((.(((......(((((.....)))))((((((((((.........)))))))))).....)))))))))))))))))))))).))))))).)))).))))))))........	UCCAAAGGGAUCGCAUUGAUCU	AUCAUGCAAUCCCUUGGGAAU	341	288	21	3	143	119	5	0	292	246	16	1	144	121	9	1	306	242	22	0	53	44	4	0	192	168	4	0	164	138	7
hlu-miR390a	000117F	903089	903211	+	AAGUAUGGAAGAAUCUGUAAAGCUCAGGAGGGAUAGCACCAGAUUAUGAUAUGUAUAUACUCGUAUUUAGAUGGACUCAUCUCUAGCGCUAUCCAUCCUGAGUUUCAUGGCUUCUUCUUACU	-45	25	23	34	40	122	48	39.3443	-36.8852	-0.9375	.((((.(((((((.((((.((((((((((.(((((((.(.((.....((((((........)))))).(((((....))))))).).))))))).)))))))))).)))).)))))))))))	AAGCUCAGGAGGGAUAGCACC	CGCUAUCCAUCCUGAGUUUCA	307	130	85	1	152	87	40	2	188	63	61	0	327	239	29	1	263	110	90	1	419	356	15	2	413	176	162	0	262	139	76
hlu-miR160a	000123F	643459	643544	+	UGUGCCUGGCUCCCUGUAUGCCGCAAGCAUCAAAUCAAAGCUAUUUUGGUUUUUGCUGGUUGCGUACGAGGAGCCAAGCAUGCAU	-40.6	22	20	18	25	85	42	49.4118	-47.7647	-0.966667	.((((.(((((((.(((((((.((.((((..(((((((((...))))))))).)))).)).))))))).))))))).))))....	UGCCUGGCUCCCUGUAUGCCG	GCGUACGAGGAGCCAAGCAUG	52	43	2	0	34	32	0	0	36	32	2	0	58	42	2	0	63	58	0	0	60	57	1	0	69	55	7	2	45	40	0
hlu-miR169a	000144F	584087	584269	-	CGGUGUCAUUUUUUGGUCGAGAGUUUUGCAUAAGAAAGAGAGAGUUGAAUGCAGCCAAGGAUGACUUGCCGGUGUUCUCAACAUUAUCUUUGUAGUUUGAUCUCCGGCAAGUUGUCUUUGGCUACAUUUUCUUUUCUUCUUCUCAUGUGACCCUUUUGAGACCACUUCAUUGAUAUCUUGUG	-72.2	40	34	37	71	182	74	40.6593	-39.6703	-0.975676	.(((((((.....((((((((((..(..(((.((((..((((((..(((((.(((((((((..(((((((((.(...((((.(((((....))))))))).).)))))))))..))))))))).)))))..))))))..)))).)))..)..)))))..)))))......))))))).....	CAGCCAAGGAUGACUUGCCGG	GGCAAGUUGUCUUUGGCUACA	60	34	8	0	91	55	10	0	120	67	16	0	48	27	8	1	345	263	37	0	67	36	7	0	659	411	136	0	491	309	101
hlu-miR169o	000144F	816506	816664	+	GAGAAAGGUGGAGUAAAAAUGAGCCAAGGAUGACUUGCCCGAGGCUAACAAUGGAGGAUAUUCGGUACAUUGACAUUGUUAUAGCUAGUCAACUACCCCAUUAUGUAUGCAUGCUGGCAAGUCAAUCAUGGUUCAUUCCUGCUCCUCUUUCUAUGUAC	-56.9	36	32	45	45	158	68	43.038	-36.0127	-0.836765	.(((((((.((((((..(((((((((.((.(((((((((.(..((..(((((((.........((((..(((((...((....))..))))).))))))))..)))..))...).))))))))).)).)))))))))..)))))))))))))......	UGAGCCAAGGAUGACUUGCCC	GCAAGUCAAUCAUGGUUCAUU	2	1	1	0	13	4	8	0	1	1	0	0	6	3	2	2	3	2	0	1	2	0	1	0	3	0	0	0	4	3	0
hlu-miR169b	000144F	1086590	1086779	+	GACAGUGUUUGCAUGAGGAGAAGGAGAGAGAGAAUGCAGCCAAGGAUGACUUGCCGGCCGGCAUAUAUAGUUGAUAGAGUGAUUUAUACAUAAAUAAAAAUAAUAAUAAUUAUGACAAGUAGGGUAACGUUGCUGGUGAGUUGUCCUUGGCUACAUUUCGCUCUUCACUCUUAAUGUAAGCCUCUGUGA	-70.2	48	28	59	54	189	76	40.2116	-37.1429	-0.923684	.((((.((((((((.(((((..((((((.((((.((.(((((((((..(((..(((((((..((...((.(((.((((....))))..(((((.((..........)).))))).))).))..))..))..)))))..)))..))))))))).)))))).)))))).))))).))))))))..))))..	CAGCCAAGGAUGACUUGCCGG	GGUGAGUUGUCCUUGGCUACA	64	34	8	1	100	55	18	1	127	67	25	0	50	27	7	11	444	263	68	1	67	36	9	10	662	411	99	0	470	309	70
hlu-miR167f	000167F	85028	85112	-	UUAAUAGUUGAAGCUGCCAGCAUGAUCUUAACUUUCCUCCUUGAUGAAGGAAGAUCAGAUCAUGUGGCAGUUUCACCUGUUAUC	-39.3	17	17	22	28	84	34	40.4762	-46.7857	-1.15588	.((((((.(((((((((((.((((((((....((((((.(.....).))))))...))))))))))))))))))).))))))..	UGAAGCUGCCAGCAUGAUCUU	GAUCAUGUGGCAGUUUCACC	5680	3792	101	0	913	672	12	0	3471	2474	85	0	952	497	57	0	776	465	23	0	446	223	86	0	1189	753	34	0	919	628	44
hlu-miR2111a	000190F	33481	33580	-	GUUAGGAUCUGGUAAUCUGCAUCCUGAGGUUUAGAAAUCACAAUUUUUUGUUGUGUAAUUAGGCCUUAGGUUGCAGAUUACCUCAUCCUUACUUGUAAU	-49.2	20	16	24	39	99	36	36.3636	-49.697	-1.36667	((.(((((..(((((((((((.((((((((((((....((((((.....))))))...)))))))))))).)))))))))))..))))).)).......	UAAUCUGCAUCCUGAGGUUUA	GGCCUUAGGUUGCAGAUUACC	14	8	1	2	2	2	0	0	14	9	3	0	3	1	1	0	18	10	0	0	1	0	1	2	8	5	1	0	2	0	1
hlu-miR5225	000197F	483529	483677	-	AGAGAAUUGAAGGGGCUACUGUCGCAGGAGAGAUGACGCCUAAUAGUGUGUGACAGAUCAAAUUAAGGGUUAUAAUUUGAUGAUAUAUAUAGUCCAUACAUUAAUAGGCUUCAUCUCCCCGCGACUGAAGCCCCUCCUACUUUCUUCA	-62.5	32	30	44	42	148	62	41.8919	-42.2297	-1.00806	.(((((..(.(((((((.(.(((((.((.(((((((.(((((.(((((((((....(((((((((.......)))))))))(((.......)))))))))))).))))).))))))))).))))).).))))))).)....)))))..	ACUGUCGCAGGAGAGAUGACGC	UUCAUCUCCCCGCGACUGAAG	281	71	18	1	159	43	7	1	197	62	12	1	165	60	7	0	144	38	26	0	227	108	2	3	316	96	27	2	189	70	15
hlu-miR159a	000218F	1044767	1044998	-	AGGGUUAUGGAGUGGAGCUCCUUGAAGUCCAAAAGAGGUUCUUUCCGGGUGGAUUGUGCUGCUGAGUUAUGGAUCCCACAGUUCUAUAUAUCUUCUCUUCAAUAGAAACACACAAAAUAAAAAACUAAGUUAAAAAGAUGAUAGACUUGUGGCUUGCAUACCUCAGGAGCUCCAUUACUCCUUCGGUUAGAUCUUUCUUUGGAUUGAAGGGAGCUCUACCCUUUAUCCCAA	-86.7	49	46	65	71	231	95	41.1255	-37.5325	-0.912632	.(((....((.((((((((((((..((((((((..(((.(((..(((((.(((.((.(((.(((((.((((.(..((((((.(((((.((((((.(((.....)))................(((...)))...))))))))))).))))))..).)))).))))).)))..))....))))))))..))).)))..))))))))..)))))))))))))).....)))..	UUUGGAUUGAAGGGAGCUCUA	GAGCUCCUUGAAGUCCAAAAG	46179	28819	64	0	23035	15653	59	0	50404	29612	38	0	34070	20412	37	0	34193	19516	51	0	19617	7323	9	0	43992	27782	73	0	22894	14730	73
hlu-miR168	000265F	470537	470644	-	AGCGGUGUCUAAUUCGCUUGGUGCAGGUCGGGAACCGGUUCGCAAUGGGAUUGGAUUUUGGAGCGAAAUGGCUCCCGCCUUGCAUCAACUGAAUCGGAGACCGCGGU	-53.4	36	24	21	26	107	60	56.0748	-49.9065	-0.89	.(((((.((..(((((.((((((((((.(((((.(((.(((((..(..(((...)))..)..))))).))).))))).)))))))))).)))))..)).)))))...	UCGCUUGGUGCAGGUCGGGAA	CCCGCCUUGCAUCAACUGAAU	473	237	26	0	289	149	41	1	433	224	44	2	297	110	32	2	328	178	40	1	196	61	23	1	506	309	89	0	353	199	47
hlu-miR156h	000326F	1169619	1169841	-	UCUAUAUAUAUAUAUACAUAUGGAUGUAUACAUAUGAUGAGAUGAAGGUAGGAGAAGAUGGAUGUUGACAGAAGAGAGAGGGCACAACCCGGCAUGGGCUAAAGAGAUCUUUGUCAAUGUUGGGAGUGUGCUUUCUCUUCUUCUGUCACCAUUGAUCCACAUCUCAUCUCAUCAUCAUUAUAUCUUCUAUACAAUAUCUAUAUGUAUAUAUAUAUAUAGCCA	-105.8	43	36	70	73	222	79	35.5856	-47.6577	-1.33924	.(((((((((((((((((((((((((((((.((((((((((((((.(((..((...(((.((((.(((((((((((((((((((((.((((((((.(((.((((....))))))).))))))))..))))))))))).)))))))))).)))).)))....))..)))))))).)))))))))....))))))...)))))))))))))))))))))))...	GCUUUCUCUUCUUCUGUCACC	UGACAGAAGAGAGAGGGCAC	113	39	8	3	73	16	4	1	95	56	9	0	61	30	3	0	96	59	1	1	35	20	2	0	174	71	13	0	79	31	6
hlu-miR535a	000339F	1112061	1112196	-	GGUUGUUAUGACAACGAGAGAGAGCACGCUUGUGUUGAUAUUCAUGAAAAGGAUCAAAACGUGAGUGUACACAUGCGUGCUCUCCCCCGUUGUCAUACAAUCUUUCUUUUUCUCUUUCUUUUCUUACGUUCUUUC	-52.7	26	29	30	50	135	55	40.7407	-39.037	-0.958182	((((((.(((((((((.(.((((((((((.(((((..(((((((((.............)))))))))))))).)))))))))).).))))))))))))))).................................	UGACAACGAGAGAGAGCACGC	GUGCUCUCCCCCGUUGUCAUA	5730	4858	532	1	5077	4473	381	1	5900	5009	484	0	8913	8370	297	0	5641	4696	677	0	6736	6341	144	0	17543	15815	1233	0	9755	8589	847
hlu-miR390b	000385F	75035	75179	+	AAGUAAAGGAGAAUCUGUAAAGCUCAGGAGGGAUAGCGCCGUGAGUAUGUAACUUAUCUUUUUUACAAUGAAAAAAGGGGUUUCAGAAAAGCUUGUACUGGCGCUAUCUAUCCUGAGUUUCAUGGCUUCUUCUUACUACAUCUC	-54.9	32	25	42	45	144	57	39.5833	-38.125	-0.963158	.(((((.((((((.((((.((((((((((.(((((((((((..(((.((.((((..((((((((......)))))))))))).)).....)))..)...)))))))))).)))))))))).)))).))))))))))).......	CGCUAUCUAUCCUGAGUUUCA	AAGCUCAGGAGGGAUAGCGCC	17	8	2	0	12	5	3	3	14	5	6	1	15	5	9	0	34	7	20	0	17	0	12	2	60	34	19	1	18	7	7
hlu-miR390c	000385F	371565	371711	+	AAGUAAAGGAGAAUCUGUAAAGCUCAGGAGGGAUAGCGCCGUGAGUAUGUAACUUAUCUUUUUUACAAUGAAAAAAGGGGUUUCAGAAAAGCUUGUACUGGCGCUAUCUAUCCUGAGUUUCAUGGCUUCUUCUUACUAUAUAUCUU	-54.9	32	23	43	48	146	55	37.6712	-37.6027	-0.998182	.(((((.((((((.((((.((((((((((.(((((((((((..(((.((.((((..((((((((......)))))))))))).)).....)))..)...)))))))))).)))))))))).)))).))))))))))).........	CGCUAUCUAUCCUGAGUUUCA	AAGCUCAGGAGGGAUAGCGCC	18	8	2	0	12	5	3	3	14	5	6	1	15	5	9	0	34	7	20	0	17	0	12	2	60	34	19	1	18	7	7
hlu-miR319g	000421F	730763	731009	+	AGGUGAGGGAGAGCUUCCUUCAGCCCACUCAUGGAUAUGACAUAACGGGGUUGGUGAAAUAACUGCCGACUCAUUCAUUCAAGCACUCAGUAGAGAAAUGAUAAUAUCAGAGAGAGAGAGAAUAUUCAUAGAAUGUAUAUAUAUAUACACACAUAAUUUUUUCUACUGUGGUUGUGUGAAUGAAGCGGGAGAUAUUUUGCAUCCCUCUUUCUCUGUGCUUGGACUGAAGGGAGCUCCUCCUUCCAU	-89.7	56	45	72	73	246	101	41.0569	-36.4634	-0.888119	.((.((((..(((((((((((((.(((..((((((...((...((.((((...(..(((((.((.(((..((((((((.(((.(((..((((((((((.................(((......)))......((((((....))))))........))))))))))))).))).))))))))..))).)).)))))..)..)))).))))))))))..))).)))))))))))))..))))))..	UUGGACUGAAGGGAGCUCCUC	AGAGCUUCCUUCAGCCCACUC	271	132	16	2	245	168	6	0	273	166	19	0	241	106	2	1	597	403	30	1	278	99	2	0	546	365	43	0	376	254	35
hlu-miR319h	000421F	730767	731007	+	GAGGGAGAGCUUCCUUCAGCCCACUCAUGGAUAUGACAUAACGGGGUUGGUGAAAUAACUGCCGACUCAUUCAUUCAAGCACUCAGUAGAGAAAUGAUAAUAUCAGAGAGAGAGAGAAUAUUCAUAGAAUGUAUAUAUAUAUACACACAUAAUUUUUUCUACUGUGGUUGUGUGAAUGAAGCGGGAGAUAUUUUGCAUCCCUCUUUCUCUGUGCUUGGACUGAAGGGAGCUCCUCCUUCC	-89.7	54	45	70	71	240	99	41.25	-37.375	-0.906061	(((((((((((((((((((.(((..((((((...((...((.((((...(..(((((.((.(((..((((((((.(((.(((..((((((((((.................(((......)))......((((((....))))))........))))))))))))).))).))))))))..))).)).)))))..)..)))).))))))))))..))).)))))))))))).))))))).	UUGGACUGAAGGGAGCUCCUC	GAGCUUCCUUCAGCCCACUC	271	132	0	2	245	168	0	0	273	166	0	0	241	106	0	1	596	403	0	0	278	99	0	0	546	365	2	0	376	254	6
hlu-miR399a	000440F	803608	803736	+	CUGAGCGAUCUCGUUGUAGGGCGUCUCUCUUUUGGCAGGCAAUUUUAAUGGAAAUUCUUUAUAUAUAUAUAUAUAUAUAUUAAUGUAAUGACCCGCCAAAGGAGAGUUGCCCUUCAACUAUUUGCUUA	-47.4	24	22	35	47	128	46	35.9375	-37.0312	-1.03043	.(((((((....((((.((((((.((((((((((((.((((.....(((....)))...((((((((....)))))))).........)).)).)))))))))))).)))))).))))...)))))))	CGCCAAAGGAGAGUUGCCCUU	GGGCGUCUCUCUUUUGGCAGG	8	6	2	1	6	4	0	0	1	1	0	0	8	4	3	0	34	23	5	0	9	3	4	0	45	24	16	0	38	22	16
hlu-miR169e	000445F	771980	772201	+	AGGAAGAGUAGAAGUCUUGUAUGAAGAUGAAGAACCAUGUUUGGUAGCCAAGGAUGACUUGCCUAAAUCCUGAUCUAGGGUAGGUUGGAAUGAACAUGAGGAGUAUCCAAACAGGAGUUUUGAGCAAACUAAGUACCCUUUUGAGCUGGUUUUUUGGGCAAGCUCCUUUGGCUAUUCUGACUGGUUCUUGUCUAUCAUGCUAGACUUUUCCUCUCUUCCAU	-87.2	54	39	57	71	221	93	42.0814	-39.457	-0.937634	.(((((((.((((((((.((((((((((.((((((((.(((.(((((((((((..(.((((((((((.((...((.((((((..(((((.....(....).....))))).....(((((.....)))))...))))))...))...))...)))))))))))..)))))))))))..))))))))))))))).)))))).))))))))...)))))))..	UAGCCAAGGAUGACUUGCCUA	GGCAAGCUCCUUUGGCUAUU	3	0	1	0	3	0	2	0	5	1	1	0	1	0	1	0	7	3	0	1	0	0	0	2	18	2	3	0	8	0	0
hlu-miR164b	000515F	416486	416705	-	CGAUGAGCUAACUAUAUUGGUUAAACUUAAGCUGGUGAGUUGCUCCUUGUUGGAGAAGCAGGGCACGUGCAAUACACCCCCCCAGUAGUAAUUUAGUUAGAAUAUGUUUCUAAUUCAAACAAUGCCACUGAAUUGAUUGUCUUGCACGCGCUCCCCUUCUCCACCAUGGGUCUCUCACCUUUCUCACCAAUGCUUUUCUUUAUUUCUAAUGGCUUCAUC	-68.7	39	55	52	73	219	94	42.9224	-31.3699	-0.730851	.((((((((......(((((.((((...((((.((((((..((.((.((.((((((((..((((.(((((((.(((......((((.(((.(((((((((((.....)))))))).)))...))).)))).......))).))))))).))))..)))))))).)).))))..))))))............))))...))))...)))))))).)))))	UGGAGAAGCAGGGCACGUGCA	CACGCGCUCCCCUUCUCCACC	808	789	0	0	309	308	0	0	754	741	2	0	912	892	2	1	693	685	0	0	677	662	1	0	1737	1722	1	0	1141	1125	1
hlu-miR164a	000539F	629053	629182	+	GGGGAGUGGCUCUUGCUGGAGAAGCAGGGCACGUGCAACCGAGCAAUCUACAUAAGCUCAACUACAAUGCAAGUAGUAGUGUUUGCACGUGCUCCCCUUCUCCAACAUGAGUUUCUCACCCUCUUAUUU	-59.2	30	34	31	34	129	64	49.6124	-45.8915	-0.925	((((((..((((.((.((((((((..((((((((((((..((((...........)))).(((((.......))))).....))))))))))))..)))))))).)).))))..))).)))........	UGGAGAAGCAGGGCACGUGCA	CACGUGCUCCCCUUCUCCAAC	799	789	2	0	310	308	1	0	757	741	4	0	914	892	0	0	701	685	10	1	676	662	1	0	1736	1722	1	0	1141	1125	2
hlu-miR398a	000600F	928083	928212	+	AGGUAGAGGAGUCUAACAGGGGUUGCCUGAGAACACAUGAAUAUAAUAUAAAUGUAUUAUUCCCAAUGUGAUUCGCUGUUUCAUGUGUUCUCAGGUCGCCCCUGCUGGGCUUCCCUCUACCGUUAGAUU	-65.6	30	27	31	41	129	57	44.186	-50.8527	-1.15088	.((((((((((((((.(((((((.(((((((((((((((((.(((((((....))))))).......(((...)))...))))))))))))))))).))))))).))))))..))))))))........	UGUGUUCUCAGGUCGCCCCUG	GGGGUUGCCUGAGAACACAUG	5250	3572	1044	4	1959	1319	462	0	3405	2559	679	3	2968	1973	868	0	1697	1237	331	1	6508	3501	2652	1	4385	2643	1407	0	3369	1866	1287
hlu-miR319a	000645F	548452	548709	+	AGAAGGAGCUCCCUUUAGUCCAAUACAGAGGGCUGAGAAGUGUGUAGAGCUGCCAUUUCAUGCAUUUUGGCUAUCCUUAAUGUUUUCAUUUAUGUUCUUUUAGAGAUUCAUCAUCAUCUUCAUCAUCAAUAUAUAUACAUAUAUAUAUAUAUAUAUAGCUAUAUAUAAAUGUUAAGGGUUUGGCCAGGUGCAUGGCGUGGGAGCAACUCCUUCCACUUCCUUAGCUCACCCAUUGGACUGAAGGGAGCUCCCUUCCU	-105.2	49	52	68	88	257	101	39.2996	-40.9339	-1.04158	.(((((((((((((((((((((((...(.(((((((((((((.(..(((((.((((.((((((((((.((((((((((((((((..................(((((........))))).........((((((((..(((((((....)))))))..))))))))))))))))))))..)))))))))))))).)))).)))...))..).))))).)))))))).)..)))))))))))))))))).)))))..	AUUGGACUGAAGGGAGCUCC	AGCUCCCUUUAGUCCAAUAC	2428	1286	502	1	428	98	25	0	1093	482	134	1	1070	431	38	2	455	12	4	3	1416	714	40	1	449	124	28	0	391	127	32
hlu-miR319b	000645F	548452	548723	+	AGAAGGAGCUCCCUUUAGUCCAAUACAGAGGGCUGAGAAGUGUGUAGAGCUGCCAUUUCAUGCAUUUUGGCUAUCCUUAAUGUUUUCAUUUAUGUUCUUUUAGAGAUUCAUCAUCAUCUUCAUCAUCAAUAUAUAUACAUAUAUAUAUAUAUAUAUAGCUAUAUAUAAAUGUUAAGGGUUUGGCCAGGUGCAUGGCGUGGGAGCAACUCCUUCCACUUCCUUAGCUCACCCAUUGGACUGAAGGGAGCUCCCUUCCUCUAUAGAUAUUCAA	-105.2	50	54	74	93	271	104	38.3764	-38.8192	-1.01154	.(((((((((((((((((((((((...(.(((((((((((((.(..(((((.((((.((((((((((.((((((((((((((((..................(((((........))))).........((((((((..(((((((....)))))))..))))))))))))))))))))..)))))))))))))).)))).)))...))..).))))).)))))))).)..)))))))))))))))))).)))))................	AUUGGACUGAAGGGAGCUCC	GCUCCCUUUAGUCCAAUAC	2428	1286	27	1	428	98	2	0	1093	482	14	1	1070	431	4	2	455	12	0	3	1416	714	0	1	449	124	2	0	391	127	4
hlu-miR395b	000686F	232740	232908	-	AGAAUGUAAUAUGUUGGGUAGAAGAUAUAGUUGAGUGUCUCCUGGAAUUCCUCUGAAGACUUCACUUGGGUUCUUCUAUACUUUAUUAAAACCCUAUUGAAGUGUUUGGGGGAACUCCCGGUGCCACUUGACUAGAACCACCAGUAUUUAACAUCCAAUAACAUUCAA	-57.1	33	32	49	54	168	65	38.6905	-33.9881	-0.878462	.((((((....((((((((...(((((((((..((((.(.((.(((.((((((..((.((((((...(((((.(..((.....))..).)))))...)))))).))..)))))).))).)).).))))..)))..........))))))...))))))))))))))..	UGAAGUGUUUGGGGGAACUC	AUUCCUCUGAAGACUUCACU	22	17	0	0	13	9	0	0	63	46	3	0	15	10	0	0	40	29	0	0	7	3	1	5	42	20	0	0	28	20	0
hlu-miR394a	000694F	567951	568115	-	GGGUUUAAUAAGGAGUUUCUCACAGAUUUUAUUGGCAUUCUGUCCACCUCCUUUUCUUUCUUUUAUUUUCUAUAUAUUCAUAUUCAUAUUACUAUAUGAUCCAAUGGAGGAGGUGGGCAUACUGCCAACUGAGUUCUGUUGGUUUCUCUUUGUAAAACCCUCGU	-60.7	28	31	36	69	164	59	35.9756	-37.0122	-1.02881	((((((.((((((((...((.(((((.((((((((((.(.((((((((((((((.........(((.....))).........((((((....))))))......)))))))))))))).).)))))).)))).))))).))...)))))))).))))))....	UUGGCAUUCUGUCCACCUCC	AGGUGGGCAUACUGCCAACU	84	79	0	0	59	57	0	0	83	78	0	0	80	69	0	0	181	176	1	0	16	15	0	0	149	143	1	1	100	97	1
hlu-miR171a	000695F	759428	759543	+	GAAAAUGGUGGGAUAUUGGAAUGGUUCAAUCAAAUCAAAUCUCCCUGAGUUUUGGGGUCAUCUUUAUUUGAUUGAGCCGUGCCAAUAUCUCGACUGCUUUCCCUUCCCUUAAUGA	-43.3	24	23	28	40	115	47	40.8696	-37.6522	-0.921277	((((..(((((((((((((.(((((((((((((((.......(((..(...)..)))........))))))))))))))).)))))))))).)))..))))..............	UGAUUGAGCCGUGCCAAUAUC	UAUUGGAAUGGUUCAAUCAAA	170	75	1	0	72	53	1	0	94	50	3	0	92	59	1	1	329	282	1	0	34	16	0	0	268	152	5	0	236	173	2
hlu-miR164c	000707F	401319	401448	-	GGGGAGUGGCUCUUGCUGGAGAAGCAGGGCACGUGCAACCGAGCAAUCUACAUAAGCUCAACUACAUUGCAAGUAGUAGUGUUUGCACGUGCUCCCCUUCUCCAACAUGAGUUUCUCACCCUCUUAUUU	-60.9	30	34	30	35	129	64	49.6124	-47.2093	-0.951562	((((((..((((.((.((((((((..((((((((((((..((((...........))))....(((((((.....)))))))))))))))))))..)))))))).)).))))..))).)))........	UGGAGAAGCAGGGCACGUGCA	CACGUGCUCCCCUUCUCCAAC	798	789	2	0	324	308	1	0	757	741	4	0	942	892	0	0	704	685	10	0	677	662	1	0	1736	1722	1	0	1147	1125	2
hlu-miR395a	000719F	595048	595226	+	AGAAUGUAAUAUGUUGGAUAGAAUAUAUAGUUGAGUGUCUCCUGGAGUUCCUCUGAAGACUUCACUUGGGUUCUUCUAUAUCGAUCUAUACUUUAUUAAAACCCUAUUGAAGUGUUUGGGGGAACUCCCGGUGCCACUUGACUAGAACCACCAGUAUUUAACAUCCAAUAACAUUCAA	-63.8	33	34	52	59	178	67	37.6404	-35.8427	-0.952239	.((((((....((((((((.((((((.((((..((((.(.((.((((((((((..((.((((((...(((((.....(((.............)))...)))))...)))))).))..)))))))))).)).).))))..)))).........))))))...))))))))))))))..	UGAAGUGUUUGGGGGAACUC	GUUCCUCUGAAGACUUCACU	17	17	0	0	10	9	0	0	47	46	0	0	13	10	0	1	36	29	0	1	5	3	0	1	41	20	0	0	29	20	0
hlu-miR156b	000727F	858751	858847	+	UUGUUGACAGAAGAUAGAGAGCACAGGUGAGCAUAUACCCAAUGAAAGACUAUCGUGUAUGAGCAGUUUUGUGCUCUCUGUUCUUCUGUCGACACA	-47.3	23	18	27	28	96	41	42.7083	-49.2708	-1.15366	.((((((((((((((((((((((((((((..(((((((................)))))))..))..))))))))))))).)))))))))))))..	UUGACAGAAGAUAGAGAGCAC	GCUCUCUGUUCUUCUGUCGACA	369	309	2	1	212	174	1	0	274	220	3	0	213	165	5	0	261	216	4	1	78	49	1	0	645	565	2	0	462	395	3
hlu-miR169c	000848F	582857	582992	-	UUGCGUAGAGAAGUAGAGAGCGUCCAGUGCAGCCAAGGAUGACUUGCCGGCGACAUUACCCAUUUGUGAUGGCGUUGGGAGUCGGCGCUGGCAAGUUGUCUUUGGCUAUGCUGGGCUCUCUUCUUCAUCAUGCAC	-77	42	31	25	37	135	73	54.0741	-57.037	-1.05479	.(((((.((((((.(((((((..(((((..(((((((((..(((((((((((..(((.((((..(((....))).)))))))...)))))))))))..)))))))))..)))))))))))).)))).))))))).	CAGCCAAGGAUGACUUGCCGG	GGCAAGUUGUCUUUGGCUAUG	97	34	7	0	116	55	3	0	136	67	14	1	301	27	9	0	418	263	31	1	82	36	10	0	651	411	46	0	465	309	35
hlu-miR172a	000851F	691579	691754	-	GGGUCACUGUUUGCCACUGGAGCAUCAUCAAGAUUCACACAUAAUCGCUCUUUUUUGGGGGAGAGUGCUCUUUUGUGGGGCUAAUCUGCUUAUAUUGCUAGCUCCACCUGCCCCUUUAUUUUCAGAUCGUCAUGUGAGAAUCUUGAUGAUGCUGCAGUGGUAAUCGAUGGCUAAC	-79.4	42	38	36	59	175	80	45.7143	-45.3714	-0.9925	.(((((.((.(((((((((.((((((((((((((((.(((((...((.(((.....(((((.((....))....(((((((((....((.......)))))))))))...)))))........))).))..))))).)))))))))))))))).))))))))).)).)))))...	AGAAUCUUGAUGAUGCUGCAG	GGAGCAUCAUCAAGAUUCACA	808	615	113	1	495	385	53	0	1098	833	148	0	860	669	104	6	228	165	35	1	477	387	46	3	523	385	93	0	385	269	64
hlu-miR156g	000971F	48871	48986	-	AAGGGAGGUGACAGAAGAGAGUGAGCACACAUGGCAUUUUCUUGCAUGGAACACCUCAUGCUUGAAGCUAUGCGUGCUCACUCUCUUGCUGUCACCCACCAUCAUCUCUUUUAUC	-64.4	25	30	28	32	115	55	47.8261	-56	-1.17091	..((..((((((((((((((((((((((.((((((...(((..((((((......))))))..))))))))).)))))))))))))).))))))))..))...............	GCUCACUCUCUUGCUGUCACC	UGACAGAAGAGAGUGAGCAC	14517	7179	6457	11	3091	1224	1681	2	9812	5029	4150	4	6516	3481	2654	5	4644	2318	2092	5	4980	3149	1523	2	11188	4398	6275	8	6294	2400	3591
hlu-miR160c	001079F	702541	702629	-	UAUGUGCCUGGCUCCCUGUAUGCCAUUUGCAGAGUCCACCGGAACAUCGAUGGCUUCCGUGGAUGGCGUAUGAGGAGCCAUGCAUAUU	-46.3	25	22	17	24	88	47	53.4091	-52.6136	-0.985106	.((((((.(((((((..((((((((((..(.(((.(((.((......)).))).))).)..))))))))))..))))))).)))))).	GCGUAUGAGGAGCCAUGCAUA	UGCCUGGCUCCCUGUAUGCCA	562	172	330	1	226	71	126	0	438	159	225	2	360	144	171	0	374	152	165	0	318	154	134	3	467	314	99	0	343	205	96
hlu-miR169g	001230F	390239	390445	+	UUAAGAGCCUUUGUUUUGUAGCCAAGGAUGACUUGCCUGCAGCCUCUUCAAGGAGUCUUAGACCCUCAUUAACCGAGCAGUUUUUUCUGUAAAUAAAAUCAUUAUUGCAUCAUGAUUGAUUACCAGUAUAUAUUAUUUAUAUUAAUCGAGAAGGAAUCCUUGUGUGGUAUUCGGGCAGUCUCCUUGGCUAUCAAGACAGGCUCUUA	-73.1	40	39	55	72	206	79	38.3495	-35.4854	-0.925316	.(((((((((..((((((((((((((((.((((.(((((..(((.(..((((((.((((.....((((((((....((((......))))((((((.((...(((((.((((....))))...))))).)).))))))...))))).))).)))).)))))).).)))...))))))))))))))))))).)))))))))))))))	UAGCCAAGGAUGACUUGCCUG	GGCAGUCUCCUUGGCUAUC	115	83	14	5	65	45	4	0	196	141	17	0	22	18	2	0	578	451	34	1	31	16	4	0	784	611	17	2	647	499	20
hlu-miR169h	001230F	390255	390431	+	UGUAGCCAAGGAUGACUUGCCUGCAGCCUCUUCAAGGAGUCUUAGACCCUCAUUAACCGAGCAGUUUUUUCUGUAAAUAAAAUCAUUAUUGCAUCAUGAUUGAUUACCAGUAUAUAUUAUUUAUAUUAAUCGAGAAGGAAUCCUUGUGUGGUAUUCGGGCAGUCUCCUUGGCUAUC	-55	34	34	47	61	176	68	38.6364	-31.25	-0.808824	.(((((((((((.((((.(((((..(((.(..((((((.((((.....((((((((....((((......))))((((((.((...(((((.((((....))))...))))).)).))))))...))))).))).)))).)))))).).)))...)))))))))))))))))))).	UAGCCAAGGAUGACUUGCCUG	GGCAGUCUCCUUGGCUAUC	113	83	14	4	63	45	4	0	193	141	17	0	21	18	2	0	573	451	34	1	31	16	4	0	778	611	17	2	640	499	20
hlu-miR166a	001286F	232365	232467	+	CGGGGAACGUUGUCUGGCUCGAGGAUACACUUUUGAUUAUUUGAUCUGUAUUUUUGCAGUCGAUUUGAGUAGUGGGUCGUCGGACCAGGCUUCAUUCCCCCC	-41.3	28	22	17	35	102	50	49.0196	-40.4902	-0.826	.((((((.(..((((((..(((.((..((((((..(....((((.(((((....))))))))).)..)).))))..)).)))..))))))..).))))))..	UCGGACCAGGCUUCAUUCCCC	GGAACGUUGUCUGGCUCGAGG	20186	18960	105	2	7723	7147	54	1	15983	14790	106	0	12858	12186	76	3	9507	8856	36	0	6890	6537	73	0	15309	14004	60	0	7481	6947	56
hlu-miR169p	001290F	222700	222858	+	GAGAAAGGUGGAGUAAAAAUGAGCCAAGGAUGACUUGCCCGAGGCUAACAAUGGAGGAUAUUGGGUACAUUGACAUUGUUAUAGCUAGCUAGCUACCCCAUUAUGUAUGCAUGCUGGCAAGUCAAUCUUGGUUCAUUCCUGCUCCUCUUUCUAUGUAC	-63.6	38	31	43	46	158	69	43.6709	-40.2532	-0.921739	.(((((((.((((((..((((((((((((.(((((((((.(..((..(((((((.((.........(((.......)))..(((((....)))))))))))..)))..))...).))))))))).))))))))))))..)))))))))))))......	UGAGCCAAGGAUGACUUGCCC	GCAAGUCAAUCUUGGUUCAUU	1	1	0	1	5	4	0	0	2	1	0	0	4	3	0	2	13	2	10	1	1	0	0	0	2	0	0	0	4	3	0
hlu-miR169d	001290F	534392	534610	+	CGGUCUGACAGUGUUUGCAUGAGGAGAAGGAGAGAGAGAAUGCAGCCAAGGAUGACUUGCCGGCCGGCAUAUAUAGUUGAUAAAGUGAUUUAUACAUAAAUAAAAAUAAUAAUAAUUAUGACAAGUAGGGUAACGUUGCUGGUGAGUUGUCCUUGGCUACAUUUCGCUCUUCACUCUCAAUGUAAGCCUCUGUGACCUAUAUUUAAUUUGUAUGUAGU	-75.1	52	33	66	67	218	85	38.9908	-34.4495	-0.883529	.((((..((((.((((((((..((((..((((((.((((.((.(((((((((..(((..(((((((..((...((.(((.((((....))))..(((((.((..........)).))))).))).))..))..))..)))))..)))..))))))))).)))))).)))))).))))..))))))))..)))))))).....................	CAGCCAAGGAUGACUUGCCGG	GGUGAGUUGUCCUUGGCUACA	64	34	8	1	100	55	18	1	127	67	25	0	50	27	7	11	444	263	68	1	67	36	9	11	662	411	99	1	470	309	70
hlu-miR399d	001348F	642438	642597	-	UCUAUAAGCAAACCAGUUGUAGGGCUUCUCUUUUUUGGCAAGUGUUGGUGAUUUGACAUAUAUAUAUAUAUAUAUAUAUAUAUAUAUCAUUAGUGUCAAUAUAAUCCCCAUACUUGCCAAAGGAGAGUUGCCCUAUGACUAAUUUAGCUUAAUUAGCAU	-70	25	24	50	60	159	49	30.8176	-44.0252	-1.42857	.((((((((((((((((..((((((..((((..((((((((((..(((.((((((((((((((((((((....)))))))))))))))).............)))).))).))))))))))..))))..))))))..)))))))).)))))..)))...	UGCCAAAGGAGAGUUGCCCUA	GGGCUUCUCUUUUUUGGCAAG	5	5	0	1	17	15	1	0	11	10	1	0	7	6	0	0	26	22	0	1	7	4	0	0	44	40	0	1	42	38	1
hlu-miR169i	001354F	509624	509725	-	AUAGCCAAGGAUGACUUGCCUGCAUUCUUUUUCUUUCAAUGGCUUUUCACACGUGGCAGGCUGUGAUUGGAUGAAUGUUCAGGCAGUCUCCUUGGCUAAUC	-45	24	22	20	35	101	46	45.5446	-44.5545	-0.978261	.((((((((((.((((.((((((((((...(((..(((.((((((.(((....))).)))))))))..))).)))))..)))))))))))))))))))...	UAGCCAAGGAUGACUUGCCUG	GGCAGUCUCCUUGGCUAAU	131	83	7	0	69	45	2	0	200	141	2	0	33	18	0	1	566	451	7	0	28	16	0	0	852	611	10	0	668	499	7
hlu-miR169j	001354F	509891	510108	-	ACAUGAAGAUAAAGAGUCUCGUUUGGUAGCCAAGGAUGACUUGCCUGCCUCCUUUCCAAGAGGUUUCAUUCAAGUUAUUAUUAUAUAUUAAUGUGUAUAUAUAUAUAUACACACACACAAAUAUAUAUACGUAUAUUUGUGUAUAUAUAUAUAAGAAACCCUUGAUGGGUUUCAGGCAGUCACCUUGGCUAAUUUGACAGGCUCUUUUUUCUCAUGC	-86.1	36	37	66	78	217	73	33.6406	-39.6774	-1.17945	.(((((..(.(((((((((.(((...(((((((((.(((((.(((((...(((...((((.((((((.............((((((((...(((((((((....))))))))).((((((((((((....))))))))))))....))))))))))))))))))..)))...)))))))))))))))))))....)))))))))))).)..))))).	UAGCCAAGGAUGACUUGCCUG	GGCAGUCACCUUGGCUAAU	111	83	2	0	62	45	1	0	190	141	8	0	19	18	0	0	546	451	10	0	23	16	0	2	791	611	27	0	650	499	33
hlu-miR156e	001402F	649613	649704	-	GAAACUGACAGAAGAGAGUGAGCACACAGAGGGCUUGGGCAUAAGAGUAUGCUAUUGCUUUUGCGUGCUUACUGCUCUAUCUGUCAGUUUA	-48.8	25	16	24	26	91	41	45.0549	-53.6264	-1.19024	.((((((((((((((((((((((((.((((((.(...((((((....))))))...))))))).))))))))).)))).))))))))))).	UGACAGAAGAGAGUGAGCAC	GCUUACUGCUCUAUCUGUCAGU	6604	6457	1	0	1723	1681	0	0	4318	4150	1	0	2733	2654	2	4	2149	2092	8	1	1631	1523	0	0	6371	6275	1	1	3659	3591	0
hlu-miR171b	001470F	656993	657088	-	AGAUGUUGGCAUAGUUCAAUCAAAUCAAAGCUCUCACUUAGAUAAUCAUCAUAUGGGUUCUUUUAUCUGAUUGAGCCGUGCCAAUAUCUAUUUAC	-35.7	15	18	28	34	95	33	34.7368	-37.5789	-1.08182	(((((((((((..(((((((((.((.((((..((((..(.(((....))))..))))..)))).)).)))))))))..)))))))))))......	UGAUUGAGCCGUGCCAAUAUC	UGUUGGCAUAGUUCAAUCAAA	79	75	0	0	56	53	0	0	56	50	0	0	68	59	0	0	301	282	3	0	22	16	0	0	165	152	1	0	193	173	7
hlu-miR162	001495F	298605	298728	+	UUGGGUGAAGUCACUGGAGGCAGCGGUUCAUCGAUCUCUUCCUGAAUUCUUUUUGUGAACAAGAAAACACAAAACAUGAAUCGAUCGAUAAACCUCUGCAUCCAGCGUUCACUCAUUUUUUUU	-44.4	23	27	34	39	123	50	40.6504	-36.0976	-0.888	.((((((((..(.(((((.((((.((((.(((((((..(((.((......(((((((..........))))))))).)))..))))))).)))).)))).))))).)))))))))........	UCGAUAAACCUCUGCAUCCAG	GGAGGCAGCGGUUCAUCGAUC	1585	1491	4	0	563	524	3	2	1212	1131	3	2	1417	1239	13	0	748	734	0	1	1292	1106	14	1	1118	1085	3	0	829	808	2
hlu-miR399b	001540F	60805	60986	-	GAAGAACAGAGCUGGUGUAAUCUUUAAGCAAACCAGUUAUAGGGCUUCUCUUUCUUGGCACGUAUUUAGUGAUUUGAUCUAGCACUACGUACUAGUAAUAAUCUCACACUUGCCAAAGGAGAGUUGCCCUACGAUUGCUUUAGCUUAGUUAGCAUAUUACUGUCUUAUCGAUUUACUCAUA	-50.6	34	35	50	62	181	69	38.1215	-27.9558	-0.733333	.((((.(((.....((((.....(((((((((.((((..((((((..(((((..((((((.((.....(.((((....((((.((...)).))))....)))).)..)).))))))..)))))..))))))..)))).))).))))))...))))....)))))))...............	UGCCAAAGGAGAGUUGCCCUA	GGGCUUCUCUUUCUUGGCACG	6	5	0	1	16	15	0	0	10	10	0	0	7	6	0	0	28	22	0	0	7	4	0	0	45	40	0	0	40	38	0
hlu-miR399c	001540F	282231	282365	+	AUAAGCAAACCAGUUAUAGGGCUUCUCUUUUUUGGCAAGUGUUGGUGAUUUGACCUAUAUAUAUAUAUCAUUAGUGUCAAUAUAAUCCCCAUACUUGCCAAAGGAGAGUUGCCCUAUGACUAAUUUAGCUUAAU	-61.9	23	23	40	48	134	46	34.3284	-46.194	-1.34565	.((((((((..(((((((((((..((((((((((((((((((.((.(((((((((((..............))).))))....)))))).))))))))))))))))))..)))))))))))..))).)))))..	UGCCAAAGGAGAGUUGCCCUA	GGGCUUCUCUUUUUUGGCAAG	5	5	0	0	17	15	1	0	11	10	1	0	7	6	0	2	26	22	0	0	4	4	0	0	44	40	0	1	41	38	1
hlu-miR319c	001556F	105781	105962	-	UGAAGAGAGCUUUCUUUAGUCCACUCAUGGUGGCAGUAGGAUUCAAUUAGCUGCCGACUCAUUCAUCCAAAUACUGAGUUGAAUCAAAGACCAAAAACCCGUAAAUGAGUGAAUGACGCGGGAGACAAAUUGUGUCUUAAGCUUCCUGUACUUGGACUGAAGGGAGCUCCCUUUCCUUUCC	-63.2	40	40	51	50	181	80	44.1989	-34.9171	-0.79	.((((.(((((..((((((((((..((.((.(((..((((((.(((((.(((.(((..(((((((..((..(((.(.(((...............)))).)))..))..)))))))..))).)).).))))).)))))).))).))))....))))))))))..))))).)))).......	UUGGACUGAAGGGAGCUCCC	GAGCUUUCUUUAGUCCACUC	260	72	0	0	317	190	0	0	382	273	1	0	601	307	0	0	494	299	0	1	622	358	0	0	316	177	0	0	250	132	0
hlu-miR167a	001661F	9019	9130	+	AGGGAAAAAGUGAAGCUGCCAGCAUGAUCUAGCUUCGUUUAGUAGAAAAGAAUAAGUAUAUAAAUACUAAUCUUAGCUAGGUCAUGCUGUGACAGCCUCACUCCUUCCUGU	-47.9	23	21	36	31	111	44	39.6396	-43.1532	-1.08864	.(((((..(((((.((((((((((((((((((((..(.((((((....................)))))).)..))))))))))))))).).)))).)))))..)))))..	UGAAGCUGCCAGCAUGAUCUA	GGUCAUGCUGUGACAGCCUCACU	9370	8377	165	3	2347	2007	133	0	7049	6351	198	7	1990	1440	321	4	3057	2670	160	1	1151	531	339	1	3851	3456	135	3	2498	2253	102
hlu-miR167b	001661F	40497	40609	+	UCGUGCACCACUAGCAGUUGAAGCUGCCAGCAUGAUCUAAACUUCCCUGUGCUCGAGGAAAGAUCGGAUCAUGUGGUAGCUUCACCUGUUGAUGGGUCAUGUUUCAAUUCCA	-49.9	27	27	26	32	112	54	48.2143	-44.5536	-0.924074	.((((..(((.((((((.(((((((((((.(((((((..(.(((.(((.......))).))).)..)))))))))))))))))).)))))).)))..))))...........	UGAAGCUGCCAGCAUGAUCUA	GAUCAUGUGGUAGCUUCACC	9394	8377	170	1	2562	2007	362	0	7068	6351	239	0	2151	1440	490	2	3145	2670	240	0	916	531	284	1	4154	3456	425	2	2682	2253	268
hlu-miR166b	001680F	390441	390590	-	CAGUUGAGGGGAAUGUCGUCUGGUUCGAGAUCUUUCUGUCAAACCUUCAAAGUGAUAUAUAUAUACAUAUAUAUAUAUGUGUGUGUGUAUGGUCUUUCUGUGAUGAUCAUCUGAAGGAUUUCGGACCAGGCUUCAUUCCCCCCAACUAU	-69.3	32	27	37	53	149	59	39.5973	-46.5101	-1.17458	.(((((.((((((((..(((((((((((((((((((.((((.((....(((((.((((((((((((((((....)))))))))))))))).).))))..))..)))).....)))))))))))))))))))..)))))))).)))))..	UCGGACCAGGCUUCAUUCCCC	GGAAUGUCGUCUGGUUCGAGA	21271	18960	11	0	8144	7147	1	1	16702	14790	10	5	13221	12186	4	0	10532	8856	9	1	6978	6537	3	0	15945	14004	27	1	7853	6947	8
hlu-miR169f	001704F	229698	229965	-	GAGAGAGAGAGAGAGAAUAGCUAAGGAAGAGUAGAAGUCUUGUAUGAAGAUGAAGAGCCAUGUUUGGUAGCCAAGGAUGACUUGCCUAAAUCCUGAUCUAGGGUAGGUUAGAAUGAACAUGAGGAGUAUCCAAACAGGAGUUUUGAGCAAACUAAUUAAGUACCCUUUUGAGCUGGUUUUUUGGGCAAGCUCCUUUGGCUAUUCUGACUGGUUCUUGUCUAUCAUGCUAGACUUUUCCUCUCUUACAUUUCCAAUAUCUUUUUCUGU	-93.1	64	43	74	86	267	107	40.0749	-34.8689	-0.870093	.(((((((((....(((....((((..((((.((((((((.((((((((((.((((((((.(((.(((((((((((..(.((((((((((.((...((.((((((((((((..((....(.((((...(((.....))).)))).).))..))))))...))))))...))...))...)))))))))))..)))))))))))..))))))))))))))).)))))).)))))))).))))))))...))).....)))))))))..	UAGCCAAGGAUGACUUGCCUA	GGCAAGCUCCUUUGGCUAUU	4	0	1	0	3	0	2	0	4	1	1	0	1	0	1	0	10	3	0	1	1	0	0	0	19	2	3	0	8	0	0
hlu-miR169m	001707F	628012	628254	+	GAUGUUGAGAAGAGUUUGAUGGAUUAUUAAUUUAGGUUUUCAGUUUCUUGCAUGAGCAAAUAGAGAGUGAACAUGAGCCAAGAAUGACUUGCCGGCUGAGUCAUUUUAUGUGUUGAUUUAAUUUAAAUAUCGACAAUAACUGACUCUUAAUCCGCCGGCAAUCUUCGAGGCUCUGUUUGGCUCUCUAUAUUCCCAUGUGAGACUUUAUAGAAAACCAAUCAUAAAAUUAUAUAUUUCAACAU	-80.8	46	38	74	84	242	84	34.7107	-33.3884	-0.961905	.(((((((((..(((((....((((.........(((((((.((.(((..((((.(...((((((((((((((.(((((..(((.((.((((((((.((((((..((((.(((((((...........))))))))))).)))))).......)))))))))))))..)))))))))).)))))))))...).))))..)))....)).)))))))))))...))))).....)))))))))	UGAGCCAAGAAUGACUUGCCGGC	CGGCAAUCUUCGAGGCUCUGU	59	31	1	4	46	37	1	0	101	67	6	1	50	37	7	1	196	139	9	2	102	80	3	1	623	424	31	0	462	324	18
hlu-miR403a	001805F	638040	638192	+	AGAAGGAGGAGGCAUAUUUCAGGUUUGUGUGUGAAUCUAAAGCAUUCUCAAUCAGGGACCAAUUUGAUUUUGGGGAUUUUGUAUUGGUGUGCGUUAGAUUCACGCACAAACUCGUAAUCUUCCUUUUUCAGUUAUUGUUUUUCCUUUCUUUA	-54.2	33	23	35	61	152	56	36.8421	-35.6579	-0.967857	.(((((((((((...(((.(..((((((((((((((((((.((((.(.(((((((((.((((.......))))...))))).))))).)))).))))))))))))))))))..).)))))))))))))).......................	UUAGAUUCACGCACAAACUCG	GGUUUGUGUGUGAAUCUAAAG	520	423	68	2	270	229	21	0	465	375	52	0	345	290	29	0	327	257	40	2	161	139	11	0	483	380	53	1	328	267	27
hlu-miR156f	001809F	636234	636327	+	GAAACUGACAGAAGAGAGUGAGCACACAGAGGGCUUGGGCAUAAGAGUAUGCUAUUGCUUUUGCGUGCUCACUGCUCUAUCUGUCAGUUUACA	-51	25	18	25	25	93	43	46.2366	-54.8387	-1.18605	.((((((((((((((((((((((((.((((((.(...((((((....))))))...))))))).))))))))).)))).)))))))))))...	UGACAGAAGAGAGUGAGCAC	GCUCACUGCUCUAUCUGUCAGU	6677	6457	0	0	1707	1681	0	0	4241	4150	1	0	2781	2654	3	3	2134	2092	0	5	1557	1523	0	0	6384	6275	1	1	3665	3591	0
hlu-miR399e	001965F	180122	180253	+	AAGCAAAUCAGUUAUAGGGCGUCUCUCCCUUGGCACGUAUUAGGUGAUUUCAUCAAGUACUUACUAGUAAUAAUCCCCUAAUAUACUUGCCAAAGGAGAGUUGCCCUACCACUGUUUGUUGAUUAUUUUAU	-53.1	23	27	36	45	131	50	38.1679	-40.5344	-1.062	.((((((.((((..(((((((.((((((.((((((.((((((((.((((....(.(((....))).)....)))).))))))))...)))))).)))))).)))))))..))))))))))...........	UGCCAAAGGAGAGUUGCCCUA	GGGCGUCUCUCCCUUGGCACG	6	5	0	2	17	15	0	7	11	10	1	2	7	6	0	4	26	22	0	0	5	4	1	1	47	40	3	0	41	38	1
hlu-miR399f	001965F	593121	593230	+	CCAGUGAUAGGGCUUCUCUUUCUUGGCACGUCUUUAGUGAUUUGAUCUAGCACUACGUACUAGUAAUAAUUUCAUUCUUGCCAAAGGAGAGUUGCCCUACGACUGUUUA	-35.9	22	23	25	39	109	45	41.2844	-32.9358	-0.797778	.((((..((((((..(((((..((((((.(.....(((((..(...((((.((...)).)))).....)..)))))).))))))..)))))..))))))..))))....	UGCCAAAGGAGAGUUGCCCUA	GGGCUUCUCUUUCUUGGCACG	5	5	0	2	15	15	0	0	10	10	0	0	7	6	0	0	23	22	0	0	4	4	0	1	42	40	0	2	39	38	0
hlu-miR319i	001986F	398842	399128	+	AGGUGAGGGAGAGCUUCCUUCAGCCCACUCAUGGAUAUGACAUAACGGGGUUGGUGAAAUAACUGCCGACUCAUUCAUUCAAGCACUCAGUAGAGAAAUGAUAAUAUCAGAGAGAGAGAGAGAGAGAGAGAAUAUUCAUAGAAUAUAUAUACACAUAAUUUUUUCUACUGUGGUUGUGUGAAUGAAGCGGGAGGUAUUUUGCAUCCCUCUUUCUCUGUGCUUGGACUGAAGGGAGCUCCUCCUUUCCAUUAUUAAUCUUGCCUCCAUUUUCUUGUGUUUCUAAACA	-90.2	64	52	81	89	286	116	40.5594	-31.5385	-0.777586	.((.((((..(((((((((((((.(((..((((((...((...((.((((...(..(((((.((.(((..((((((((.(((.(((..((((((((((((((...))))......................((((((...)))))).............))))))))))))).))).))))))))..))).)).)))))..)..)))).))))))))))..))).)))))))))))))..)))).)).......................................	UUGGACUGAAGGGAGCUCCUC	AGAGCUUCCUUCAGCCCACUC	270	132	16	3	245	168	6	0	273	166	19	0	241	106	2	1	602	403	30	1	282	99	2	0	550	365	43	0	378	254	35
hlu-miR398b	002011F	220567	220696	-	AGGUAGAGGAGUCUAACAGGGGUUGCCUGAGAACACAUGAAUAUAAUAUAAAUGUAUUAUUUCCAAUGUGAUUCGCUGUUUCAUGUGUUCUCAGGUCGCCCCUGCUGGGCUUCCCUCUACCGUUAGAUU	-65.6	30	26	31	42	129	56	43.4109	-50.8527	-1.17143	.((((((((((((((.(((((((.(((((((((((((((((.(((((((....))))))).......(((...)))...))))))))))))))))).))))))).))))))..))))))))........	UGUGUUCUCAGGUCGCCCCUG	GGGGUUGCCUGAGAACACAUG	4853	3572	1044	0	1876	1319	462	1	3628	2559	679	11	3134	1973	868	5	1674	1237	331	0	6709	3501	2652	1	4385	2643	1407	0	3414	1866	1287
hlu-miR171c	002012F	604411	604506	-	AAGAUGUUGGCAUAGUUCAAUCAAAUCAAAGCUCUCACUUAGAUAAUCAUCAUAUGGGUUCUUUUAUCUGAUUGAGCCGUGCCAAUAUCUAUUUA	-36	15	17	29	34	95	32	33.6842	-37.8947	-1.125	.((((.((((((..(.((((((((((.((((..(.(((...(((....)))..))).)..)))).)))))))))).)..)))))).)))).....	UGAUUGAGCCGUGCCAAUAUC	UGUUGGCAUAGUUCAAUCAAA	79	75	0	0	56	53	0	0	56	50	0	0	68	59	0	0	301	282	3	0	22	16	0	0	166	152	1	0	193	173	7
hlu-miR166c	002066F	457944	458065	-	UAGUUGAGGGGAAUGCUGUCUGGUUCGAAACCAUUCCUAGCUAUUAUUAUGUUAAUCAUAUAACACAAUUAUAAUUUGAAUGAUUUCGGACCAGGCUUCAUUCCCCUCAACUCAAACAAAU	-55	19	24	38	40	121	43	35.5372	-45.4545	-1.27907	.((((((((((((((..(((((((((((((.(((((..((.(((.(((.(((((......))))).))).))).)).))))).)))))))))))))..)))))))))))))).........	UCGGACCAGGCUUCAUUCCCC	GGAAUGCUGUCUGGUUCGAAA	21477	18960	214	1	8278	7147	106	1	16823	14790	116	1	13299	12186	89	0	10629	8856	93	2	7007	6537	35	0	16019	14004	132	2	7979	6947	102
hlu-miR827a	002103F	441896	441999	+	GAUGGAUAUGUUUGUUGAUGGUCAUGUAACUGAAGGUGAACAACAGCAUCAACACUCAACAUGUACACCUAAUGGUUAGAUGACCAUCAACAAACACUUUCAU	-43.7	19	20	36	28	103	39	37.8641	-42.4272	-1.12051	.(((((..(((((((((((((((((.(((((..(((((.(((...................))).)))))...))))).)))))))))))))))))..)))))	UUAGAUGACCAUCAACAAACA	UUUGUUGAUGGUCAUGUAACU	85	63	22	0	211	174	25	0	107	89	17	2	129	107	17	0	72	54	14	2	33	24	8	0	131	111	16	0	98	74	17
hlu-miR319d	002149F	363895	364066	+	AGGAGCUUCCUUCAGUCCAGUCCGAGGCACUUUAGAAGCUGACACUUAGCUGCUGACUCGUUGAUUCAAGAGCUCACCAACCAAAUUGAGAGCAAUUGGUGUGUUUUUGAUCCAACGAUGCGGGAGCUGAGUUCAGUUAACUUGUCACGUCUUGGACUGAAGGGAGCUCCC	-90.1	44	40	41	46	171	84	49.1228	-52.6901	-1.07262	.(((((((((((((((((((..((.((((..(((...(((((.((((((((.(((..((((((..((((((((.(((((.....((((....))))))))).))))))))..))))))..))).))))))))))))))))..)))).))..))))))))))))))))))).	UUGGACUGAAGGGAGCUCCC	GAGCUUCCUUCAGUCCAGUC	156	72	0	0	223	190	0	2	322	273	0	2	414	307	0	2	361	299	0	1	513	358	1	1	216	177	1	0	157	132	1
hlu-miR393a	002218F	496939	497063	+	AACUAGAGAAAGCAUCCAAAGGGAUCGCAUUGAUCCAUCCUUACUAUUCUCCAUCAUUAUAUAUAUUAUUCCCUCCCAUUGUUUCGGAUCGAUCAUGCUAUCCCUUUGGAUUCCUCCUUUGGUC	-37.81	17	33	30	44	124	50	40.3226	-30.4919	-0.7562	.(((((((...(.((((((((((((.((((.((((.((((..((....................................))...)))).)))))))).)))))))))))).)...))))))).	UCCAAAGGGAUCGCAUUGAUCC	AUCAUGCUAUCCCUUUGGAUU	21	7	0	2	9	2	0	0	24	8	5	1	15	1	3	1	23	7	6	0	13	3	4	1	11	1	6	0	12	3	2
hlu-miR477f	002261F	68545	68693	+	AUAAGGCUCGUAACCACCCUCAAAGGCUUCCAAUAUUCCAUGCAUAACAUAUAUGUCGAUUACUAUGUAUAGUUCAAGUACUACAUAUGUGUGUAUUGACUGAUAGCGUGGGGUAUUGGGAGUUCUUUGAGGAAGGUUGUAAGUCUUA	-65	33	24	42	49	148	57	38.5135	-43.9189	-1.14035	.(((((((..(((((..((((((((((((((((((((((((((.((.((.....((((((((((((((.((((......)))).))))).))).)))))))).))))))))))))))))))).)))))))))..)))))..)))))))	UCAAAGGCUUCCAAUAUUCCA	GGGUAUUGGGAGUUCUUUGAGG	2444	1907	56	1	671	575	7	0	1378	1083	17	2	492	360	12	0	191	118	3	0	270	141	9	2	1783	1450	14	1	962	764	7
hlu-miR477e	002261F	157491	157574	+	GAGCCUCUAAUCUCCCUCAAAGGCUUCUAAUAUUGUCAAUAUAUAUAUAUAUUGGAGGCCUUUUUGGGGGAUUGAAGUCUCUG	-37	17	15	21	30	83	32	38.5542	-44.5783	-1.15625	(((.((.(((((((((..((((((((((((((((((........))).)))))))))))))))..))))))))).)).)))..	AUCUCCCUCAAAGGCUUCUAA	GGAGGCCUUUUUGGGGGAUUG	26	21	0	0	7	5	1	0	18	9	4	0	2	1	1	0	12	4	5	0	2	0	0	0	50	31	11	0	26	12	9
hlu-miR396a	002308F	364365	364629	+	UAGUCUUGGUCAUGCUUUUCCACAGCUUUCUUGAACUUAUUAUUUUCUUCUGAUAUAUAAUUAAUUAAUUACAAUUUUUCUUUCUUUUUUUUUUUUUUUUUUUUUGUCUUCCCUUGAUCGAGAUCGAUGGAUCGUUCUCUUCUUUCUCUAAGAUUAAACCAUGGCCGGAAUUAUUUGAUUUUAUUAUACAAUAUUCUUAUUAUUAUCAUUAUAAUUAUUAUAAGCUCAAGAAAGCUGUGGGAGAACAUGGUGAUGUCAAGACUU	-61.1	34	39	66	125	264	73	27.6515	-23.1439	-0.836986	.(((((((((((((.(((((((((((((((((((.(((((..........(((((.(((((............................................(((.....((((((((((..((.(((....)))..))..))))...)))))).....))).(((((...(((((......)).))).))))).))))))))))...........))))).))))))))))))))))))).))))).....)))))))).	UUCCACAGCUUUCUUGAACUU	GCUCAAGAAAGCUGUGGGAGA	2536	2104	16	2	1984	1742	1	5	3935	3366	21	5	1086	887	5	1	2612	2153	33	0	236	161	16	1	4639	3909	40	3	2777	2397	18
hlu-miR396b	002308F	364365	364629	+	UAGUCUUGGUCAUGCUUUUCCACAGCUUUCUUGAACUUAUUAUUUUCUUCUGAUAUAUAAUUAAUUAAUUACAAUUUUUCUUUCUUUUUUUUUUUUUUUUUUUUUGUCUUCCCUUGAUCGAGAUCGAUGGAUCGUUCUCUUCUUUCUCUAAGAUUAAACCAUGGCCGGAAUUAUUUGAUUUUAUUAUACAAUAUUCUUAUUAUUAUCAUUAUAAUUAUUAUAAGCUCAAGAAAGCUGUGGGAGAACAUGGUGAUGUCAAGACUU	-61.1	34	39	66	125	264	73	27.6515	-23.1439	-0.836986	.(((((((((((((.(((((((((((((((((((.(((((..........(((((.(((((............................................(((.....((((((((((..((.(((....)))..))..))))...)))))).....))).(((((...(((((......)).))).))))).))))))))))...........))))).))))))))))))))))))).))))).....)))))))).	UUCCACAGCUUUCUUGAACUU	GCUCAAGAAAGCUGUGGGAGA	2536	2104	16	2	1984	1742	1	5	3935	3366	21	5	1086	887	5	1	2612	2153	33	0	236	161	16	1	4639	3909	40	3	2777	2397	18
hlu-miR171d	002327F	315862	315954	+	GAUAUUGGCCUGGUUCACUCAGACAGAAAAGUUGUGUGUAUAUAUAUAUAUAUAUUUAGUUGAUCUGGUUUGAUUGAGCCGUGCCAAUAUCU	-38.3	20	12	25	35	92	32	34.7826	-41.6304	-1.19688	(((((((((.(((((((.(((((((((..(..((.((((((((....)))))))).))..)..))).)))))).))))))).))))))))).	UGAUUGAGCCGUGCCAAUAUC	UAUUGGCCUGGUUCACUCAGA	81	75	0	0	55	53	0	0	56	50	0	0	65	59	0	0	298	282	0	0	22	16	0	0	162	152	0	1	185	173	0
hlu-miR828a	002373F	242718	242847	+	UUGUAACUUCUCUUGCUCAAAUGAGUAUUCCAGCUACUGUAGCUAUGUGCUUAUAUAUAUACAUGUGUGUGUAUGAAUUGGCUUCUGCUCUCUGAGAUACUCAUUUGAACAAGAAAUGUUACACAAAAG	-42.7	23	22	37	47	129	45	34.8837	-33.1008	-0.948889	.((((((...(((((.((((((((((((..(((.......(((((.....(((((((((((....)))))))))))..)))))........)))..)))))))))))).)))))...))))))......	UCUUGCUCAAAUGAGUAUUCCA	AGAUACUCAUUUGAACAAGAAA	326	287	2	0	175	157	0	0	302	255	3	0	16	13	1	1	66	42	1	0	0	0	0	0	140	109	4	0	160	139	3
hlu-miR167c	002408F	238756	238854	+	ACCUCCAACAGUUGAAGCUGCCAGCAUGAUCUACACUCUGCUAUAUAUAAAACUAAGAAGAGAGUAGAUCAUGUGGCAGUUUCAUCUGUUGAUGGGAA	-50.2	21	19	32	26	98	40	40.8163	-51.2245	-1.255	.((..((((((.(((((((((((.((((((((((.((((.((.............)).)))).))))))))))))))))))))).))))))..))...	UGAAGCUGCCAGCAUGAUCUA	GAUCAUGUGGCAGUUUCAUC	9383	8377	153	0	2407	2007	171	1	7112	6351	243	0	1832	1440	133	2	3085	2670	167	0	1203	531	348	0	4095	3456	335	0	2720	2253	268
hlu-miR827b	002414F	301992	302107	+	GGUGAUGGAUAUGUUUGUUGAUGGUCAUGUAACUGAAGGUGAACUACAGCAUCAACACUCAACAUGCACACCUAAUGGUUAGAUGACCAUCAACAAACACUUUCAUGAUACAUAA	-45.1	22	22	40	31	115	44	38.2609	-39.2174	-1.025	.((.(((((..(((((((((((((((((.(((((..(((((.......((((...........)))).)))))...))))).)))))))))))))))))..))))).))......	UUAGAUGACCAUCAACAAACA	UUUGUUGAUGGUCAUGUAACU	85	63	22	0	211	174	25	1	107	89	17	0	129	107	17	1	72	54	14	3	33	24	8	0	131	111	16	0	98	74	17
hlu-miR166d	002499F	340367	340499	-	CAGUUGAGGGGAAUGUCGUCUGGUUCGAGAUCUUUCUGUCAAACCUUCAAACUGAUAUACAUAUAUAUAUAUGGUCUUUCUGUGAUGAUCAUCUGAAGGAUUUCGGACCAGGCUUCAUUCCCCCCAACUAUA	-55.8	26	28	34	44	132	54	40.9091	-42.2727	-1.03333	.(((((.((((((((..(((((((((((((((((((..........(((....((....(((((....))))).....))..))).........)))))))))))))))))))..)))))))).)))))...	UCGGACCAGGCUUCAUUCCCC	GGAAUGUCGUCUGGUUCGAGA	21274	18960	11	0	8144	7147	1	1	16702	14790	10	4	13221	12186	4	0	10532	8856	9	1	6978	6537	3	0	15946	14004	27	1	7853	6947	8
hlu-miR395c	002779F	355523	355624	+	GGAGAAGUGUCUCCUGGAGCUCCUCUGAAGACUUCAGUUGAGGCUCUUUAGUAAAUUGCCCUAUUGAAGUGUUUGGGGGAGCUCCCGGUGCCACCUAUCCA	-49.4	28	24	20	29	101	52	51.4851	-48.9109	-0.95	(((...(((.(.((.((((((((((..((.((((((((.(.(((.............)))).)))))))).))..)))))))))).)).).)))...))).	UGAAGUGUUUGGGGGAGCUCC	AGCUCCUCUGAAGACUUCAGU	51	33	17	0	23	13	10	0	157	103	51	0	86	64	19	1	46	25	18	0	77	66	7	0	175	102	69	0	66	41	25
hlu-miR167e	002828F	188836	188956	+	CUCGUGCACCUCCAACAGUUGAAGCUGCCAGCAUGAUCUGCACUUUGCUAUAUAUAAAACUAAGAAGAGAGUAGAUCAUGUGGCAGUUUCAUCUGUUGAUGGGAAGCAUGACAGAAAAUA	-54.6	27	23	39	31	120	50	41.6667	-45.5	-1.092	.((((((.((..((((((.(((((((((((.((((((((((.((((.((.............)).)))).))))))))))))))))))))).))))))..))...)))))).........	UGAAGCUGCCAGCAUGAUCUG	GAUCAUGUGGCAGUUUCAUC	6790	5626	153	0	2629	2128	171	2	5153	4222	243	0	3104	2419	133	2	2211	1684	167	0	2505	1609	348	0	3489	2771	335	0	2226	1712	268
hlu-miR319e	002833F	466571	466784	-	AGAGAUUGUUUAAGUGAGCUUCCUUCAGUCCACUCAUGGAUGGGUAAGAGGGUUUGAAUUAUCUGCCGACUCAUUCAUUCAAACACAGUAGAGAAAGGGUCUAAUAUUUACUACUGUGGAUGUGUGAAUGAUGCGGGAGAUAAAAUUUCAUCUUUUUCUUCUCUUUGCUUGGACUGAAGGGAGCUCCCUUUUACUAUUUUCAUUAUUAUUAUA	-85.7	45	34	56	78	213	79	37.0892	-40.2347	-1.08481	.((((..((..(((.(((((((((((((((((..((.(((..((.(((((((..((((((((((.(((..((((((((.((..((((((((.(((...........))).))))))))..)).))))))))..))).))))))...)))))))))))))..))).))..))))))))))))))))).)))..))...))))............	UUGGACUGAAGGGAGCUCCC	GAGCUUCCUUCAGUCCACUC	222	72	3	1	317	190	4	0	450	273	29	0	604	307	7	2	506	299	21	0	621	358	3	0	376	177	42	0	268	132	37
hlu-miR166f	002949F	292313	292527	-	GGUGGGAAGCUUCUUUUGAGGUGAAUGUUGUCUGGCACGAGGUCACCAAUUUCAACUUUAUAAUUUAUUAAUUUUUGGCUGGUUAAUUAUUUACCGAUCAACCAUAUCAAAACUAUAUAUGAUUUUAUAUAUAUAUUUAUAGAUGUGUUUAUAUGGUUAAUAUUAGUGUCUUCGGACCAGGCUUCAUUCCCCUCAACUACUGCUUCGAUCAUCG	-64.9	37	35	57	85	214	72	33.6449	-30.3271	-0.901389	((((((((((.....((((((.(((((..((((((..(((((.(((.(((...((((.(((((...........(((..((((.........))))..))).((((((..((.((((((((......)))))))).))...)))))).))))).))))...))).))).)))))..))))))..))))).)))))).....)))))..))))).	UCGGACCAGGCUUCAUUCCCC	UGAAUGUUGUCUGGCACGAGG	21187	18960	6	2	8131	7147	1	1	16625	14790	11	0	13149	12186	3	1	10494	8856	4	0	6946	6537	4	0	15830	14004	6	0	7823	6947	6
hlu-miR166g	002949F	292321	292522	-	GAAGCUUCUUUUGAGGUGAAUGUUGUCUGGCACGAGGUCACCAAUUUCAACUUUAUAAUUUAUUAAUUUUUGGCUGGUUAAUUAUUUACCGAUCAACCAUAUCAAAACUAUAUAUGAUUUUAUAUAUAUAUUUAUAGAUGUGUUUAUAUGGUUAAUAUUAGUGUCUUCGGACCAGGCUUCAUUCCCCUCAACUACUGCUUC	-60	31	33	55	82	201	64	31.8408	-29.8507	-0.9375	(((((.....((((((.(((((..((((((..(((((.(((.(((...((((.(((((...........(((..((((.........))))..))).((((((..((.((((((((......)))))))).))...)))))).))))).))))...))).))).)))))..))))))..))))).)))))).....)))))	UCGGACCAGGCUUCAUUCCCC	UGAAUGUUGUCUGGCACGAGG	21187	18960	6	2	8131	7147	1	1	16625	14790	11	0	13149	12186	3	1	10494	8856	4	0	6946	6537	4	0	15830	14004	6	0	7823	6947	6
hlu-miR482b	002992F	439615	439832	+	AGGAAAAGGGAAUGAGUUUGCUGGAAGUUGUAGGUAUGGGGGGAUUGGGCAAGCUAUAUCUAUAUAUAUAUAUAUCCAUAUAUAUAUAUAACCAUAUAUGUAUAAUCUAUAUCUAUAUUUAAUGUAUAAUCUUUAUAUAUAUAUAUGAAAAAAAAAAAAUAGGAGCUUUUCCCAACACCUCCCAUACCAUUGAUUCCAGGCCUUCUUCCCUUUUCCC	-78.9	33	34	75	75	217	67	30.8756	-36.3594	-1.17761	.(((((((((((.(((....((((((...((.(((((((((((.(((((.(((((.....(((((((((((((....)))))))))))))..((((((((((((.........(((((.....))))).......))))))))))))................)))))..)))))..)))))))))))))...))))))..))).))))))))))).	UUUUCCCAACACCUCCCAUACC	UAUGGGGGGAUUGGGCAAGC	38952	34144	2	2	20873	18379	1	2	30638	26952	0	0	14401	12328	0	1	49185	42567	2	0	7362	5876	0	6	53060	46271	0	0	25711	22685	1
hlu-miR171e	003045F	325219	325321	+	GAUAUUGGCCUGGUUCACUCAGACAGAAAAGUUUUGUGUGUAUAUAUAUAUAUAUAUCAAUAUAUUUAGUUGAUCUGGUUUGAUUGAGCCGUGCCAAUAUCU	-37.1	20	13	29	40	102	33	32.3529	-36.3725	-1.12424	(((((((((.(((((((.(((((((((.......(((((((((....)))))))))(((((.......)))))))).)))))).))))))).))))))))).	UGAUUGAGCCGUGCCAAUAUC	UAUUGGCCUGGUUCACUCAGA	81	75	0	0	55	53	0	0	56	50	0	0	65	59	0	1	298	282	0	0	22	16	0	0	162	152	0	0	185	173	0
hlu-miR169n	003056F	202313	202509	+	AGGUUUUCAGUUUCUUGCAUGAGCAUAAUAGAGAGUGAACAUGAGCCAAGAAUGACUUGCCGGCUGAGUCAUUUUAUGUGUUGAUUUAAUUUAAAUAUCGACAAUAACUGACUCUUAAUCCGGCCGGCAAUCUUCGAGGCUCUGUUUGGCUCUCUAUAUUCCCAUGUGAGAUUUUAUAGAAAACCAAUCAUAAAAU	-74.7	38	35	58	65	196	73	37.2449	-38.1122	-1.02329	.(((((((.((.(((..((((.(.(((.(((((((((((((.(((((..(((.((.(((((((((((((((..((((.(((((((...........))))))))))).)))))).......))))))))))))))..)))))))))).))))))))))).).))))..)))....)).)))))))...........	UGAGCCAAGAAUGACUUGCCGGC	CGGCAAUCUUCGAGGCUCUGU	52	31	1	6	46	37	1	1	101	67	6	2	50	37	7	0	196	139	9	2	103	80	3	1	620	424	31	0	462	324	18
hlu-miR156c	003103F	298125	298266	+	GGUUUGACGCUGUUGACAGAAGAUAGAGAGCACAGAUGAUGAUAUGCAACCAAAAAAAGCCAAUAAUUUCGAGCUGCAUCUCACUCGUUUGUGCUCUCUAUGCUUCUGUCAUCACCUUCAGUCUCUCUGCCCAACUUCUUU	-52	26	35	37	43	141	61	43.2624	-36.8794	-0.852459	(((..((.((((.(((((((((((((((((((((((((((((.(((((..........................))))).))).))))))))))))))))).))))))))).......)))).))...)))..........	UUGACAGAAGAUAGAGAGCAC	GCUCUCUAUGCUUCUGUCAUCA	396	309	1	1	306	174	7	0	365	220	7	1	251	165	7	6	390	216	11	2	121	49	4	0	886	565	18	1	614	395	10
hlu-miR477a	003157F	190117	190279	+	UCAAGGCAUCGGUUGCUGACUCUCCCUCAAGGGCUUCUUAAUUAUGGCUCUAACUUAUAUCUAUACAAAACAAGGCCCAUGUGAGAAAUUUGAGAUGAUGAAAAGGUUUGGUGGCUUAAUUAAGGAGCCUGCGAGGGGGAGUACAGUAAGCUUUGCCUUGCC	-66.4	41	31	44	46	162	72	44.4444	-40.9877	-0.922222	.(((((((..(.((((((((((((((((..((((((((((((((.(((((((((((.((((....(((((((.......)))......))))....))))...))).)))).))))))))))))))))))..)))))))))).)))))).)..)))))))..	ACUCUCCCUCAAGGGCUUCU	GAGCCUGCGAGGGGGAGUAC	1047	748	0	0	515	401	0	0	1652	1183	0	8	168	124	1	2	1711	1327	1	0	259	228	0	1	2238	1734	1	2	1123	898	1
hlu-miR393d	003185F	306303	306452	+	AGGUGGAGACUUCCAAAGGGAUCGCAUUGAUCUAAUUAUAUUCGAUACUUGGUGAUGUGAUGAUCAACAGUAGUGAUAAUUCUAAAUUUGUUACUAUAUUUUAGUUCAUAUAAUUGGAUCAUGCAAUCCCUUGGGAAUUUUCCAUCGUA	-56.8	29	21	44	55	149	50	33.557	-38.1208	-1.136	.((((((((.((((.(((((((.((((.(((((((((((((..((.(((...((((......))))...((((((((((........)))))))))).....)))))))))))))))))))))).))))))).)))).))))))))...	UCCAAAGGGAUCGCAUUGAUCU	AUCAUGCAAUCCCUUGGGAAU	337	288	21	3	143	119	5	0	292	246	16	0	144	121	9	1	306	242	22	0	53	44	4	0	192	168	4	0	164	138	7
hlu-miR2111b	003199F	411951	412044	-	GUUAGGAUCUGGUAAUCUGCAUCCUGAGGUUUAGAAAUCACAAUUUUUUGUUGUGUAAUUAGGCCUUAGGUUGCAGAUUACCUCAUCCUUACU	-49.2	19	16	22	36	93	35	37.6344	-52.9032	-1.40571	((.(((((..(((((((((((.((((((((((((....((((((.....))))))...)))))))))))).)))))))))))..))))).)).	UAAUCUGCAUCCUGAGGUUUA	GGCCUUAGGUUGCAGAUUACC	14	8	1	2	2	2	0	0	14	9	3	0	3	1	1	0	18	10	0	0	1	0	1	2	8	5	1	0	2	0	1
hlu-miR403b	003368F	55073	55209	-	AGAAGGAGGAGGCAUAUUUCAGGUUUGUGUGUGAAUCUAAAGCAUUCUCAUUCAGGGACCAAUUUGAUUUUGGGGAUUUUGUAUUGGUGUGCGUUAGAUUCACGCACAAACUCGUAAUCUUCCUUUUUCGGUUAUU	-52.3	33	20	32	51	136	53	38.9706	-38.4559	-0.986792	.(((((((((((...(((.(..((((((((((((((((((.((((.((.((.(((((.((((.......))))...))))).)).)).)))).))))))))))))))))))..).)))))))))))))).......	UUAGAUUCACGCACAAACUCG	GGUUUGUGUGUGAAUCUAAAG	520	423	68	1	271	229	21	0	466	375	52	0	345	290	29	0	327	257	40	0	162	139	11	0	483	380	53	0	329	267	27
hlu-miR393b	003668F	308686	308810	-	AACUAGAGAAAGCAUCCAAAGGGAUCGCAUUGAUCCAUCCUUACUAUUCUCCAUCAUUAUAUAUAUUAUUCCCUCCCACUGUUUCGGAUCGAUCAUGCUAUCCCUUUGGAUUCCUCCUUUGGUC	-37.81	17	34	30	43	124	51	41.129	-30.4919	-0.741373	.(((((((...(.((((((((((((.((((.((((.((((..((....................................))...)))).)))))))).)))))))))))).)...))))))).	UCCAAAGGGAUCGCAUUGAUCC	AUCAUGCUAUCCCUUUGGAUU	22	7	0	0	10	2	0	0	24	8	5	0	18	1	3	1	24	7	6	0	13	3	4	1	11	1	6	1	13	3	2
hlu-miR477c	003709F	45986	46080	+	GGUAGCCGUCUUAUCACUCUCCCUUAAGGCUUCUAGAUUUUGGUGAAUGGCAAAAGCUGGGAGCCUUAAGGGGAGAGUGGCUAGAUUGGUGCCA	-53.5	29	18	21	26	94	47	50	-56.9149	-1.1383	((((.(.((((..(((((((((((((((((((((((.(((((.(....).))))).))))))))))))).))))))))))..)))).).)))).	ACUCUCCCUUAAGGCUUCUA	GGAGCCUUAAGGGGAGAGUGG	4407	3463	757	6	1180	872	250	0	4603	3748	654	1	855	433	377	97	6038	4467	1318	2	929	348	533	1	7220	5360	1588	1	3933	2754	960
hlu-miR160b	003805F	80028	80116	+	AGUAUGCCUGGCUCCCUGUAUGCCAUCUGCUGAGCCCAUCAGCAAAUUGGUGGCAUCGUUAGAUGGCGUGCGAGGAGCCAUGCAUGCC	-54.6	26	24	17	21	88	50	56.8182	-62.0455	-1.092	.((((((.(((((((.(((((((((((((.(((..(((((((....)))))))..))).))))))))))))).))))))).)))))).	UGCCUGGCUCCCUGUAUGCCA	GCGUGCGAGGAGCCAUGCAUG	340	330	0	0	132	126	0	1	233	225	0	1	186	171	0	0	172	165	0	0	139	134	0	0	106	99	0	1	103	96	0
hlu-miR159b	003864F	105964	106204	-	AGGGUUAUGGAGUGGAGCUCCUUGAAGUCCAAAAGAGGUUCUUUCCGGGUGGAUUGUGCUGCUGAGUUAUGGAUCCCACAGUUCUAUAUAUCUUCUCUUCAAUAGAAACACAAAAAAAAACUAAGUUAAAAAGAUGAUAGACUUGUGGCUUGCAUACCUCAGGAGCUCCAUUACUCCUUCGGUUAGAUCUUUCUUUGGAUUGAAGGGAGCUCUACCCUUUAUCCCAAAUCUAUUCAUAUC	-87	49	48	67	76	240	97	40.4167	-36.25	-0.896907	.(((....((.((((((((((((..((((((((..(((.(((..(((((.(((.((.(((.(((((.((((.(..((((((.(((((.((((((.(((.....)))............(((...)))...))))))))))).))))))..).)))).))))).)))..))....))))))))..))).)))..))))))))..)))))))))))))).....)))...............	UUUGGAUUGAAGGGAGCUCUA	GAGCUCCUUGAAGUCCAAAAG	46208	28819	64	1	23035	15653	59	0	50404	29612	38	0	34070	20412	37	0	34197	19516	51	0	19615	7323	9	0	43992	27782	73	0	22894	14730	73
hlu-miR482c	003892F	300433	300613	+	GGAGAACAAGGAGAGGAAAGGAUUUUCAGAAGCUUAUAGUGUGGGUGAGUAGGAAAGAUAAGAUUUUUACUCACUUGGUUUGAUCAAACAAAACAAGUGAAAGUGAAAAAAGAGUUGAUCUUUCCUACUCCACCCAUACCAUACGUUUCCGAUUAUUCCUCCCUCUCCUUAGUUUCUUCC	-80.2	36	34	57	53	180	70	38.8889	-44.5556	-1.14571	((((((((((((((((..((((...((.(((((.(((.(((((((((((((((((((((....((((((((((((((.((((......)))).)))))))..)))))))........)))))))))))).))))))))).))).))))).))....)))).))))))))).).)))))).	UCUUUCCUACUCCACCCAUACC	UGUGGGUGAGUAGGAAAGAUA	45565	43917	376	15	18353	17523	169	1	38095	36717	350	1	18854	18022	228	1	46664	44498	377	0	12466	11790	189	0	65941	62957	757	0	33096	31204	609
hlu-miR167d	003968F	4059	4162	-	UCGUGCACCACUAGCAGUUGAAGCUGCCAGCAUGAUCUAAACUUCCCUGUGCUCGAGGAAAGAUCGGAUCAUGUGGUAGCUUCACCUGUUGAUGGGUCACGUU	-51.7	27	25	23	28	103	52	50.4854	-50.1942	-0.994231	.((((..((((...(((.(((((((.(((.(((((((..(.(((((((.......))))))).)..)))))))))).))))))).)))...))))..))))..	UGAAGCUGCCAGCAUGAUCUA	GAUCAUGUGGUAGCUUCACC	9546	8377	170	4	2533	2007	362	0	7150	6351	239	0	2265	1440	490	1	3152	2670	240	1	918	531	284	1	4138	3456	425	1	2702	2253	268
hlu-miR171f	004012F	236135	236303	-	UUACUAACUUCAUAUGUGUUUGGCUGAAAAUGGUGGGAUAUUGGAAUGGUUCAAUCAAAUCAAAUCUCCCUAAGUGUUGGGGUCAUCUUUAUUUGAUUGAGCCGUGCCAAUAUCUCGACUGCUUUCCCUUCCCUUAAUGAGCUUCGAUUACAUUUUUCUUUAGUAUAU	-52.9	31	31	40	66	168	62	36.9048	-31.4881	-0.853226	.((((((......(((((...((((((((..(((((((((((((.(((((((((((((((.......(((((.....)))))........))))))))))))))).)))))))))).)))..)))).............)))).....)))))......))))))...	UGAUUGAGCCGUGCCAAUAUC	UAUUGGAAUGGUUCAAUCAAA	170	75	1	0	73	53	1	0	94	50	3	0	92	59	1	2	328	282	1	0	34	16	0	0	269	152	5	1	238	173	2
hlu-miR394d	004157F	117822	117989	+	CUCUAGGGUUUCUCAGGGGCCUUGUUGCAGAUCCAGUUUGGCAUUCUGUCCGCCUCCAUUAUUACUCUUUUUUAUGUAUUGGUACAUCGCAUUGGAGGCAGCCAGCAUGUCAAACUGACUCUGUAAAUUUCUCUCUGAGAAACUUGUAGAACGACAUAUCACAUAUU	-61.7	33	38	38	58	167	71	42.515	-36.9461	-0.869014	.((((((((((((((((((.....(((((((..(((((((((((.(((.(.(((((((...............(((((....))))).....))))))).).))).)))))))))))..))))))).....)))))))))))))).)))).................	UUUGGCAUUCUGUCCGCCUCC	AGGCAGCCAGCAUGUCAAACU	152	130	1	4	140	118	0	1	146	138	0	0	118	108	2	0	213	187	2	2	62	52	0	0	143	125	1	0	132	110	2
hlu-miR394b	004255F	140952	141125	-	GGGUUUAAUAAGGAGUUUCUCACAGAUUUUAUUGGCAUUCUGUCCACCUCCUUUUCUUUCUUUUAUUUUCUAUAUAUUCAUAUUCAUAUUCAUAUUACUAUAUGAUCCAAUAAUGGAGGAGGUGGGCAUACUGCCAACUGAGUUCUGUUGGUUUCUCUUUGUAAAACCCUCGU	-61.7	28	32	40	73	173	60	34.6821	-35.6647	-1.02833	((((((.((((((((...((.(((((.((((((((((.(.(((((((((((......................................((((((....))))))((((....))))))))))))))).).)))))).)))).))))).))...)))))))).))))))....	UUGGCAUUCUGUCCACCUCC	AGGUGGGCAUACUGCCAACU	83	79	0	0	59	57	0	0	83	78	0	0	80	69	0	0	182	176	1	0	16	15	0	0	149	143	1	1	100	97	1
hlu-miR319f	004298F	304992	305206	-	GGUGAUGAGAUAUGAAGAGAGCUUUCUUUAGUCCACUCAUGGGUGGCAGUAUGAUUCAAUUAGCUGCCGACUCAUUCAUCCAAAUACUGAGUUGAAUCAAAGACCGAAAACCCAGUAAAUGAGUGAAUGACGCGGGAGACAAAUUGUGUCUUAAGCUUCCUGUACUUGGACUGAAGGGAGCUCCCUUUCCUUUCCUGAUAUAUCUCUUUAUAUA	-76.6	47	42	61	64	214	89	41.5888	-35.7944	-0.860674	.((((.(((((((((((.(((((..((((((((((...(((((.(((..((.(((.(((((.(((.(((..(((((((..((..(((((.(((...((.......)).))).)))))..))..)))))))..))).)).).))))).))).)).))).)))))...))))))))))..))))).))))...........))))))).))))...	UUGGACUGAAGGGAGCUCCC	GAGCUUUCUUUAGUCCACUC	259	72	0	0	317	190	0	0	383	273	1	0	578	307	0	1	494	299	0	1	606	358	0	0	316	177	0	0	252	132	0
hlu-miR477b	004510F	295019	295165	-	UCUGAGAUUCCCAUGUAAGCCACUUUCGUUGUUCACUCUCCCUCAAGGGCUUCUAGGAGCUAUAUAUAUAGAUAUAGAUAUAUAGCUACAAAGAGCUGGAAACCCUUUGCGAGAGAGUGGACAAAAUGUGUCUUGAUCAUCUCAUC	-48.1	29	31	42	44	146	60	41.0959	-32.9452	-0.801667	..((((((.......((((.(((.....((((((((((((.(.((((((.((((((.((((((((((.((....)).))))))))))........)))))).))).))).).))))))))))))...))).))))...))))))..	ACUCUCCCUCAAGGGCUUCU	AAACCCUUUGCGAGAGAGUGG	1083	748	1	3	532	401	0	0	1596	1183	0	0	250	124	1	1	1594	1327	0	0	351	228	1	0	2402	1734	0	0	1313	898	1
hlu-miR408a	004658F	226689	226834	-	UUAAGAUGAAAAAGGGGGAUGUGAAACAGAACAAGACAGGGAACAGACAGAGCAUGGAUGGAGCUUUCGACAGAAUGUGAAGCCUGUUGUGGCUCUACUCAUGCACUGCCUCUUCCCUGGCUCACCCUGUGCCCUCUUCCCCCUU	-60.6	37	37	38	33	145	74	51.0345	-41.7931	-0.818919	...........((((((((.(.((.(((((..(((.(((((((.((((((.(((((.((.((((...(.(((((........))))).)..)))).)).))))).)))))).))))))).)))..))))).))..).))))))))	CAGGGAACAGACAGAGCAUGG	AUGCACUGCCUCUUCCCUGGC	367	92	83	10	200	73	30	3	238	46	77	7	311	174	34	3	91	14	21	2	671	453	11	2	556	248	27	7	453	197	48
hlu-miR171g	004725F	49282	49387	-	AGAAAGCGAUGUUGGUGAGGUUCAAUCCGAAGACGGAUUUACACGCAUCCCUAAUCUCGUAAAAUACGAUCUCAGAUUGAGCCGCGCCAAUAUCACUUUCGUUUU	-40.9	22	24	30	29	105	46	43.8095	-38.9524	-0.88913	.(((((.((((((((((.(((((((((.((....((((........))))......(((((...)))))..)).))))))))).)))))))))).))))).....	UUGAGCCGCGCCAAUAUCACU	CGAUGUUGGUGAGGUUCAAUC	77	50	3	0	49	39	1	0	65	53	7	0	53	45	2	0	160	107	15	0	39	35	3	0	241	176	17	0	190	132	14
hlu-miR159c	004761F	24390	24581	+	UUACAUGGAGCUCCUUUCGGUUCAAACUAAGGGAAGGAGUGAAAGGUACUGACACGGCUGCUGGUUCAUGGAUUCCUCUGAGCUGCGCAGGAUAAGUCACGCUGGUGCGCAGCUUAAGGGUUUGCAUGACUCAGGAGACGUGUUUGCCUUCUCCAUUAAACCUUACUUGGAUUGAAGGGAGCUCCUGUAUU	-95.3	54	40	43	54	191	94	49.2147	-49.8953	-1.01383	.((((.(((((((((((((((((((..(((((.((((((...((((((..((((((.((.(((..(((((.(..((..(((((((((((.....((.....))..)))))))))))..))..).)))))..))).)).)))))))))))))))).))...))))).)))))))))))))))))))))))..	CUUGGAUUGAAGGGAGCUCC	AGCUCCUUUCGGUUCAAACU	4176	3337	151	1	3027	2639	83	2	6093	5265	169	2	7167	6450	117	1	10862	9013	607	1	6034	5274	114	1	6055	3792	637	2	3750	2489	404
hlu-miR397a	004824F	301168	301286	+	GAAACGUCAUUGAGUGCAGCGUUGAUGAAGCUUCAACUUCAACUUCACCUUCAUUUCGAUCGGAAAAAAAUUAAUGAAAAUUAAAACUUCAUUGACGCUGCACUCAAUUAUGUUUCUA	-44	18	23	40	37	118	41	34.7458	-37.2881	-1.07317	(((((((.((((((((((((((..((((((.......................((((.....))))....(((((....)))))..))))))..)))))))))))))).)))))))..	UCAUUGAGUGCAGCGUUGAUG	UUGACGCUGCACUCAAUUAUG	587	480	5	2	345	250	11	1	403	317	4	1	246	172	9	0	219	134	3	1	237	192	6	0	538	344	4	0	445	288	5
hlu-miR166e	005035F	167398	167590	+	UUCUUUGAAAGUGAAUUAGGAUGAGAGGAAUGUUGUCUGGCUCGAGGACAUGGAGGUUGAUUCUCUAUAUUAUCGUGUUGUAUAAAUAUAGCUUGAAACCCUAAAUGAUUCUCGGACCAGGCUUCAUUCCCCCCAACCAAAAUUUUCUUCUUAUCCCAGAUCUAACCGUUCGAAGAUAGUCUAUUAUUCUUG	-52.4	37	37	52	66	192	74	38.5417	-27.2917	-0.708108	.((((((((...((.((.((((((((((((((..((((((..((((((.(((((((.....)))))))....(((.((((((....)))))).)))............))))))..))))))..))))))..................)))))))).)).))......))))))))................	UCGGACCAGGCUUCAUUCCCC	GGAAUGUUGUCUGGCUCGAGG	19986	18960	78	2	7613	7147	34	1	15785	14790	59	1	12706	12186	41	2	9424	8856	47	0	6802	6537	38	0	15039	14004	62	2	7377	6947	34
hlu-miR477d	005164F	10938	11032	+	GGUAGCCGUCUUAUCACUCUCCCUUAAGGCUUCUAGAUUUUGGUUAAUGGCAAAAGCUGGGAGCCUUGAGGGGAGAGUGGCUAGACUGGUGCCA	-55.4	29	19	20	26	94	48	51.0638	-58.9362	-1.15417	((((.(.((((..(((((((((((((((((((((((.(((((.(....).))))).))))))))))))).))))))))))..)))).).)))).	ACUCUCCCUUAAGGCUUCUA	GGAGCCUUGAGGGGAGAGUGG	3612	3463	0	3	918	872	0	0	3908	3748	0	0	462	433	0	2	4638	4467	0	0	377	348	0	1	5564	5360	0	0	2918	2754	0
hlu-miR172b	005648F	60540	60690	-	UUUGCUGGUGUGGCAUCAUCAAGAUUCACAUGCAUAUAAACGCCGGCGAAUCGAGAGAGUGAGAGAAAAUAUGGCUCUAAUCAUUCCAAAUUUUGUCGGUGCCGAAGCUGUUUAGAUAGUGAGAAUCUUGAUGAUGCUGCAUCGGCAAUG	-64.6	39	26	43	42	150	65	43.3333	-43.0667	-0.993846	.(((((((((..(((((((((((((((.(((.....(((((((((((..(((((.(((((.((((.........))))...........))))).)))))))))..)).)))))....))).)))))))))))))))..)))))))))..	AGAAUCUUGAUGAUGCUGCAU	GUGGCAUCAUCAAGAUUCACA	416	347	2	1	406	357	3	0	995	903	1	1	407	341	0	0	479	418	6	2	329	295	0	1	1208	1123	11	2	817	764	4
hlu-miR169k	005823F	65452	65650	+	ACAUGAAGAUAAAGAGUCUCGUUUGGUAGCCAAGGAUGACUUGCCUGCCUCCUUUCAAGAGGUUUCAAAUCAUCAUUAUAUAUACAUACAUAUAUAUAUAUUAUAUAUAUAUAAAUACUUGUAUUUUUUUUAUAAGAAACCGUUGAUGGGUUUCAGGCAGUCACCUUGGCUAAUUUGACAGGCUCUUUUUUCUCAUGC	-73.2	32	33	59	74	198	65	32.8283	-36.9697	-1.12615	.(((((..(.(((((((((.(((...(((((((((.(((((.(((((...(((.((((..((((((.........(((((((((.(((.((((....))))))).))))))))).....((((.......)))).)))))).)))).)))...)))))))))))))))))))....)))))))))))).)..))))).	UAGCCAAGGAUGACUUGCCUG	GGCAGUCACCUUGGCUAAU	113	83	2	0	61	45	1	0	192	141	8	0	21	18	0	0	543	451	10	2	23	16	0	0	790	611	27	1	649	499	33
hlu-miR169l	005823F	65799	66002	+	GAAGAGGGAGGGCCUUACAUGAAGAAGAGAGUGUGCUUAGUUCGAUAGCCAAGGAUGACUUGCCUGCAUUAUUCUUUUUCUUUUCAAUGGCUUUCAUGACACGUGGAAGUCGAUGAUUGGAUGAAUGUUCAGGCAGUCUCCUUGGCUACUCUGACGCCCUCUUUUCUCUCAUGUUAGGCCUUUCUCUCUUCCUAAUUUCCUUC	-98.2	46	45	41	71	203	91	44.8276	-48.3744	-1.07912	(((((((((((((((.(((((((((((((((.(((.((((...(.((((((((((.((((.(((((...(((((....(((..(((.(((((((((((...))))))))))).)))..))).)))))..)))))))))))))))))))).))))))).))))))))).)))))).))))))))).))))))............	UAGCCAAGGAUGACUUGCCUG	GGCAGUCUCCUUGGCUACU	130	83	18	1	65	45	1	0	227	141	31	1	24	18	0	0	557	451	18	1	31	16	4	1	791	611	16	1	670	499	28
hlu-miR159d	005857F	145683	145905	+	UUGGUGUAUUUUACAUGGAGCUCCUUUCGGUUCAAACUAAGGGGAGGAGUGAAAGGUACUGACACGGCUGCUGGUUCAUGGAUUCCUCUGAGCUGCGCAGGAUAAGUCACGCUGGUGCGCAGCUUAAGGGUUUGCAUGACUCAGGAGACGUGUUUGCCUUCUCCAUUAAACCUUACUUGGAUUGAAGGGAGCUCCUGUAUUACCAUUCUACCCCUAUCUUUC	-98.1	58	49	47	68	222	107	48.1982	-44.1892	-0.916822	.(((((.....((((.(((((((((((((((((((..(((((.((((((...((((((..((((((.((.(((..(((((.(..((..(((((((((((.....((.....))..)))))))))))..))..).)))))..))).)).)))))))))))))))).))...))))).))))))))))))))))))))))).))))).................	CUUGGAUUGAAGGGAGCUCC	AGCUCCUUUCGGUUCAAACU	4184	3337	151	2	3034	2639	83	2	6090	5265	169	3	7167	6450	117	1	10862	9013	607	1	6035	5274	114	1	6054	3792	637	1	3749	2489	404
hlu-miR160d	005860F	148104	148365	-	UCAUAUAUGGUUUUAUUAUUGCUCCUUUUUGUUUUGUUUUGGCAUCGUGAACAACAAUAUACAAGAGUAUGUGCCUGGCUCCCUGUAUGCCAUUUGCAGAGUCCACCGGAACAUCGAUGGCUUCCGUGGAUGGCGUAUGAGGAGCCAUGCAUAUUCAUGUAUCAUAUACAUGGUAAUCAUAUGUAUAUAUAUAUAUAUAUGAACACAUCCGCCUUUUAAUUACAUAAGGGGAAGCAUUAGCAAAAAAUUAAACAUGUAUUA	-83.5	49	45	78	89	261	94	36.0153	-31.9923	-0.888298	.(((((....((((..((.((((((((..(((........((((.((((..((...(((((((........(((.((((((((..((.(((((...((((..((((((......))))))..))))...))))).))..)))))))).)))...........(((((((((.........)))))))))..))))))).))..))))..))))........))).))))...)))).))..))))......))))).....	GCGUAUGAGGAGCCAUGCAUA	UGCCUGGCUCCCUGUAUGCCA	562	172	330	1	226	71	126	0	439	159	225	2	361	144	171	0	374	152	165	0	316	154	134	3	467	314	99	1	343	205	96
hlu-miR171h	005899F	221229	221334	-	AGAAAGCGAUGUUGGUGAGGUUCAAUCCGAAGACGGAUUUACACGCAUCCCUAAUCUCGUAAAAUACGAUCUCAGAUUGAGCCGCGCCAAUAUCACUUUCGUUUU	-40.9	22	24	30	29	105	46	43.8095	-38.9524	-0.88913	.(((((.((((((((((.(((((((((.((....((((........))))......(((((...)))))..)).))))))))).)))))))))).))))).....	UUGAGCCGCGCCAAUAUCACU	CGAUGUUGGUGAGGUUCAAUC	77	50	3	0	49	39	1	0	65	53	7	0	53	45	2	0	160	107	15	0	39	35	3	0	241	176	17	0	190	132	14
hlu-miR408b	006339F	202731	202874	-	AAAGAGGGGGAUGUGAAACAGAACAAGACAGGGAACAGACAGAGCAUGGAUGGAGCUUUCGACAGAAUGUGAAGCCUGUUGUGGCUCUACUCAUGCACUGCCUCUUCCCUGGCUCACCCUGUGCCCUCUUCCCCCUUUUCUUU	-62.9	36	38	34	35	143	74	51.7483	-43.986	-0.85	.((((((((((.(.(..((((....((.(((((((.((.(((.(((((..(((((((..((((((..(....)..)))))).)))))))..))))).))).)).))))))).))....))))...).).))))))))))....	CAGGGAACAGACAGAGCAUGG	AUGCACUGCCUCUUCCCUGGC	367	92	83	10	199	73	30	3	238	46	77	7	311	174	34	3	92	14	21	2	671	453	11	2	555	248	27	7	454	197	48
hlu-miR535b	007003F	90341	90483	+	GGUUGUUAUGACAACGAGAGAGAGCACGCUUGUGUUGAUAUUCAUGAAAAGGAUCAAAACGUGAGUGUACACAUGCGUGCUCUCCCCCGUUGUCAUACAAUCUUUCUUUUUCUCUUUUUUUUCUUACGUUGUUUCAAUCUAC	-52.7	27	29	33	53	142	56	39.4366	-37.1127	-0.941071	((((((.(((((((((.(.((((((((((.(((((..(((((((((.............)))))))))))))).)))))))))).).)))))))))))))))........................................	UGACAACGAGAGAGAGCACGC	GUGCUCUCCCCCGUUGUCAUA	5762	4858	532	1	5074	4473	381	2	5828	5009	484	0	8850	8370	297	0	5642	4696	677	0	6644	6341	144	1	17512	15815	1233	0	9767	8589	847
hlu-miR166h	007034F	182093	182195	+	CGGGGAACGUUGUCUGGCUCGAGGAUACACUUUUGAUUAUUUGAUCUGUAUUUUUGCAGUCGAUUUGAGUAGUGGGUCGUCGGACCAGGCUUCAUUCCCCCC	-41.3	28	22	17	35	102	50	49.0196	-40.4902	-0.826	.((((((.(..((((((..(((.((..((((((..(....((((.(((((....))))))))).)..)).))))..)).)))..))))))..).))))))..	UCGGACCAGGCUUCAUUCCCC	GGAACGUUGUCUGGCUCGAGG	20186	18960	105	2	7723	7147	54	1	15983	14790	106	0	12858	12186	76	3	9513	8856	36	0	6890	6537	73	0	15309	14004	60	0	7481	6947	56
hlu-miR397b	008198F	131212	131331	-	UGAAACGUCAUUGAGUGCAGCGUUGAUGAAGCUUCAACUUCAACUUCACCUUCAUUUCGAUCGGAAAAAAAUUAAUGAAAUUAAAACUUCAUUGACGCUGCACUCAAUUAUGUUUCUAU	-43.9	18	23	39	39	119	41	34.4538	-36.8908	-1.07073	.(((((...((((((((((((((..((((((((((((((((((((((.((.((.....))..))...)))))...)))))))))))))))))..))))))))))))))...)))))...	UCAUUGAGUGCAGCGUUGAUG	UUGACGCUGCACUCAAUUAUG	597	480	5	0	347	250	11	0	410	317	4	0	245	172	9	0	221	134	3	0	239	192	6	0	539	344	4	0	450	288	5
hlu-miR828b	009516F	4919	5048	-	UUGUAACUUCUCUUGCUCAAAUGAGUAUUCCAGCUACUGUAGCUAUGUGCUUAUAUAUAUACAUGUGUGUGUAUGAAUUGGCUUCUGCUCUCUGAGAUACUCAUUUGAACAAGAAAUGUUACACAAAAG	-42.7	23	22	37	47	129	45	34.8837	-33.1008	-0.948889	.((((((...(((((.((((((((((((..(((.......(((((.....(((((((((((....)))))))))))..)))))........)))..)))))))))))).)))))...))))))......	UCUUGCUCAAAUGAGUAUUCCA	AGAUACUCAUUUGAACAAGAAA	324	287	2	0	175	157	0	0	302	255	3	0	16	13	1	0	67	42	1	0	1	0	0	0	140	109	4	0	160	139	3
hlu-miR156d	010706F	12826	13007	+	CGAGAGCCAUUGGUUUGACGCUGUUGACAGAAGAUAGAGAGCACAGAUGAUGAUAUGCAACCAAAAAAAAGCCAAUAAUUUCGAGCUGCAUCUCACUCGUUUGUGCUCUCUAUGCUUCUGUCAUCACCUUCAGUCUCUCUGCCCAACUUCUUUAUCCUUUCUAUGAAUCUCAUUCUUACAC	-55.2	30	46	48	57	181	76	41.989	-30.4972	-0.726316	.((((..(((.(((..((.((((.(((((((((((((((((((((((((((((.(((((...........................))))).))).))))))))))))))))).))))))))).......)))).))...)))...................)))..))))..........	UUGACAGAAGAUAGAGAGCAC	GCUCUCUAUGCUUCUGUCAUCA	395	309	1	2	306	174	7	0	365	220	7	2	251	165	7	5	390	216	11	2	120	49	4	0	886	565	18	1	614	395	10
[truncated: 20 more columns]

## Sheet: Table S2
Table S2: Novel miRNAs identified in Humulus lupulus. miRNAs were predicted in hop draft genome sequences obtained from HopBase using the miRNA prediction pipeline (miR-PREFeR).
																			CER_Ctrl1				CER_Ctrl2				CER_Ctrl3				CER_Inoc1				CER_Inoc2				CER_Inoc3				WTR_Ctrl1				WTR_Ctrl2
miRNA ID	Seqid(chromosome)	start position	end position	strand	precursor sequence	MFE (kcal/mol)	G	C	A	U	Length of miRNA precursor	G+C	G+C %	AMFE %	MFEI	secondary structure	mature sequence	star sequence	reads mapped to precursor	reads mapped to mature	reads mapped to star	reads mapped to antisense region	reads mapped to precursor	reads mapped to mature	reads mapped to star	reads mapped to antisense region	reads mapped to precursor	reads mapped to mature	reads mapped to star	reads mapped to antisense region	reads mapped to precursor	reads mapped to mature	reads mapped to star	reads mapped to antisense region	reads mapped to precursor	reads mapped to mature	reads mapped to star	reads mapped to antisense region	reads mapped to precursor	reads mapped to mature	reads mapped to star	reads mapped to antisense region	reads mapped to precursor	reads mapped to mature	reads mapped to star	reads mapped to antisense region	reads mapped to precursor	reads mapped to mature	reads mapped to star
miRNA-1	000000F	2878786	2878890	-	GGGAAGAAUCAAUAUUGGUGAUGAACCCAUAGCCCAGUGAGCUACAGUCAAACUAGGAGGUUCAUCACGGGGCUUUGGGUUCAUCACCUAUGUUGAUUCUUCUG	-61.2	27	21	27	29	104	48	46.1538	-58.8462	-1.275	.((((((((((((((.(((((((((((((.(((((.((((...((..((......))..))...)))).))))).))))))))))))).)))))))))))))).	UGAUGAACCCAUAGCCCAGUG	CGGGGCUUUGGGUUCAUCACC	39	37	0	4	11	10	0	0	16	16	0	2	14	13	0	0	55	49	1	0	19	19	0	0	62	58	0	2	56	50	0
miRNA-50	000022F	92887	93051	+	GACGAUAUUGAGUGAAAAGCUAAGAAUAUUGAAUCUCGUCCAGCCGAGUAGAAAUAUCUUAGUAGUGGGUCUCAGGUCUUAAUAAUAAUUUUUUUUUGCUAAGUCUUAUAAUUUCUGUUCGACUGGUAGAGAUUCAAUCUUUUCUGCAGAUCACUCUUAUCGUA	-52.3	31	25	47	61	164	56	34.1463	-31.8902	-0.933929	.((((((..((((((...((..((((.((((((((((..((((.(((((((((((..((((((((.((..(...)..))................)))))))).......))))))))))).))))..)))))))))).))))..))...)))))).)))))).	UUUCUGUUCGACUGGUAGAGA	UCGUCCAGCCGAGUAGAAAUA	615	285	9	0	204	70	0	0	430	173	3	0	163	57	4	0	30	8	0	4	56	18	0	1	260	129	1	8	258	96	4
miRNA-56	000023F	1031001	1031381	+	CUUCACUUUAAGUUCUAUCGGUAGGGCUUUUACUAUUUCUCGACCCCUGAACAAUUUUUGGCGCGGUUUUUUUUUUUUAUGACCAUGUAUAUUGUAGCUAUUUAGAGCAUCCUGCAAAUUUUCAGAAAAUUCCGAAUAGUUUACAGUACCGAAAACUAGGUUCAAACAUGUUGUUUUUCACGCGCAUAAAAAAAAUUAGUCACACGUGCAACAACAUGUUUGAACCUAGUUUUUGAUACUGUAAACUAUUCGGAAUUUUCUGAAAAUUUUCAGGAUGUCCUAAAUAGCUACAACAUACACAGUCAUAAAAAAAAAUUACGCCGAAAACUGUUCACGAGUCGAGAACACUGAGAGCCCCACCGAUAGAGCUUAAAGUGAAA	-220.4	62	73	124	121	380	135	35.5263	-58	-1.63259	.(((((((((((((((((((((.(((((((((....((((((((.(.((((((.(((((((((..(((((((((...((((((..(((((.((((((((((((((..(((((((.(((((((((((((((((((((((((((((((((.((((((((((((((((((((((((((...((((.(..(((......)))....).)))).)))))))))))))))))))))))))).))))))))))))))))))))))))))))))))).)))))))..)))))))))))))).)))))..)))))))))))))))..))))))))).)))))).).))))))))...))))))))).))))))))))))))))))))).	GUAUAUUGUAGCUAUUUAGAGCAU	GUCCUAAAUAGCUACAACAUACAC	10	0	0	40	8	0	0	24	10	0	0	26	4	0	0	15	11	0	0	21	8	0	0	14	14	0	0	48	191	165	0
miRNA-63	000025F	1359479	1359906	-	CAAUUCUUCUAUAGGGGAUUCACUUUAAGCCCUACCAGUAGGGCUUUCAAUGUUUCUCGACCCGUGAACAGUUUUCAGCGCGAAUUUUUUUUAUAACCGUGUAUAUUGUAGCUAUUUAGAGCAUCCUGCAAAUUUUCAAAAAAUUUCGAAUAGUUUACAGUAUCGAAAACUAGGUUCAAACAUGUUGUUUUCUAUGCGCAUAAAAAAAGAAUAUAUUUAAAGUUAGUCACGAGUGCAACAACAUGUUUGAACCUAGUUUUCAGUACUGUAAACUAUUUGGAAUUUUCUGAAAAUUUGCAGGAUGUUCUAAAUAGCUGCAAUAUACACGGUCAUAAAAAAAAAUCGCACUGAAAACUGUUCACGAGUUGUAAAUACUGAGAGCCCUACCGGUAGGGCUUA…	-269.2	76	78	139	134	427	154	36.0656	-63.0445	-1.74805	.(((((((((.((((((.((((((((((((((((((.((((((((((((.(((((..((((.((((((((((((((((.((((.((((((((((.(((((((((((((((((((((((((((((((((((((((((((.((((((((((((((((((((((((.((((((((((((((((((((((((......(((((.................................))))))))))))))))))))))))))))).)))))))))))))))))))))))).))))))))))))))))))))))))))))))))))))))))))).)))))))))).)))).)))))))))))))))).)))).))))).)))))))))))).)))))))))))…	GUAUAUUGUAGCUAUUUAGAGCAU	GUUCUAAAUAGCUGCAAUAUACAC	32	0	0	14	26	0	0	11	205	185	0	15	18	0	0	12	13	0	0	6	42	0	0	4	67	0	0	25	37	0	0
miRNA-90	000044F	262090	262537	-	AAAAAAUACUAUUGGAAAUUUCUUUGGUAAGGCCUUCAAAAAAAGCCCUACUGGUGGGGCUUUUUUGUGUUUUCAACCCGUGAAUAGUUUUCGGUGCAAUUUUUUUUUAUGACAGUGUAUAUUGUAGUUAUUUAGAGCAUCCUGCAAAUUUUCAGAAAAUUCUGAAUAAUUUACAGUGCUGAAAACUAAGUUCAAACAUGCUAUUUUCCACGCGCAUAAAAAAAUUAGUUAUGCGUGCAACAACCUAUUUUUAUACUAGUUUUCGGUAUUGUAAGUUAUUCGGAAUUUUCUGAAAAUUUGCAGGAUGCUCUAAAUAACUACAAUGUACAUGGUCAUAAAAAAAUUCGCGCCGAAAACUAUUCACGGGUUGAAAACACAAAAGAAUCCUACCAGUAGGGC…	-266.2	72	74	145	156	447	146	32.6622	-59.5526	-1.82329	.(((((((.(((((((...((((.(((((.((.(((((((((.(((((((((((((((..(((((((((((((((((((((((((((((((((((((....((((((((((((.((((((((((((((((((((((((((((((((((((((((((((((((((((((((((((((((((((((((((.((..(((.(((..........(((((((((.........)))))))))........))).)))..)))))))))))))))))))))))))))))))))))))))))))))))))))))))))))))))))))))))))))).))))))))))))...)))))))))))))))))))))))))))))))))))))..))))))))))))))…	GUAUAUUGUAGUUAUUUAGAGCAU	GCUCUAAAUAACUACAAUGUACAU	76	45	0	12	13	0	0	21	14	0	0	3	9	0	0	4	17	0	1	16	46	0	0	4	34	0	2	64	16	0	1
miRNA-126	000069F	1976923	1977368	-	GAUAUGGAUAUGUAUAUGAAUUUUUUUUUAUAGGGCUUCAUUUUAAGCUUCCUAGUAUGACUUUCAGAGUUUUCGACCCGUAAAUAGUUUUUUGCGUGAAUUUUUUUUAUAACCGUGUAUAUUGUAGCUAUUUAGAGCAUCCUGCAAAUUUUUAGAAAAUUCUGAAUAGUUUACAGUACCGAAAACUAGAUUCAAACAUGUUGCUUUCUACGCACAUAAAAAAAAAAUUAGUCACGCGUGUAACAACAUUUUUGUACGGUAAACUAUUCAGAAUUUUAUGAAAUUUUGCAAUAUGCUCUAAAUAGCUAUAAUAUACACAGUCAAAAAAAAAUCGUGUCGAAAACUAUUAACGGAUCAAGAACACUGAAAGUCUUACCAGUAGGGUUUAAAAUAAAGCCC…	-180.7	62	62	165	156	445	124	27.8652	-40.6067	-1.45726	.((((..((((((((((((...((((((((((((((((.(((((((((((.((.(((.(((((((((.(((((.((.((((.((((((((((.((((((.((((((((...((.((((((((((((((((((((((((((..((((((.(((((.(((((((((((((((((((.((((.(((.......)))....((((((.((..(((((......................))))).))))))))....)))).))))))))))))))))))).))))).))))))..)))))))))))))))))))))))))).)).)))))))).)))))).)))))))))).)))).)).))))).))))))))).))).))..))))))))))).))))))…	GUAUAUUGUAGCUAUUUAGAGCAU	GCUCUAAAUAGCUAUAAUAUACAC	14	0	0	10	7	0	0	5	192	185	0	4	10	0	0	2	41	0	0	5	5	0	0	0	21	0	0	21	19	0	0
miRNA-143	000085F	87387	87736	-	UCCUAGUGAGGCUCUCAGUGUUUUUUGAUCCAUUCAUAGUUUUUAGCAUGAUUUUUUUUAUGAUCAUGUAUAUUGUAGCUAUUUAGAGCAUCCUACAAAUUUUAGAAAAUUUCAAAUAGUUUAUAGUACUGAAAACUAGGUUCAAACAUGUUGAUUUUUAGGCACAUAAAAAAAUUAGUCACGCGUACAACAACAUGUUUGAACUUAGUUUUCGGUAUUAUAAACUAUUUGAAAUUUUCUGAAAAUUUGCAAGAUGAUCUAAAUAGCUACAAUAUACACAGUCAUAAAAAAAAAAAUUCGCACAAAAAACUGUUCACGGGUUGAGAACACUGAGAGUCUUACCGGUAAG	-165.8	54	50	124	121	349	104	29.7994	-47.5072	-1.59423	.((.(((.((.(((((((((((.......((((..(.(((((((.(((...((((((((((((..((((((((((((((((((((((.(((((((((((((((((((((((((((((((((((((.(((.((((((((.((((((((((((((....(((..(((((((.........)))))))..))))))))))))))))).)))))))).))).)))))))))))))))))))))).))))))))))))))).))))))))))))))))))))))..)))))))))))).....)))...))))))).)..))))......))))))))))).)).)))))....	GUAUAUUGUAGCUAUUUAGAGCAU	GAUCUAAAUAGCUACAAUAUACAC	45	0	2	13	11	0	0	6	34	0	2	17	8	0	0	5	18	0	0	2	7	0	0	7	23	0	0	19	20	0	4
miRNA-161	000097F	1169808	1170193	+	AGGCUUUACUUUAAGCCCUAUCGGUAAAGUUCUCAGUGUUUCUUGACCCAUGAACAGUUUUCGGCGCGACUUUUUUUUUAUGACCAUGUAUAUUGUAGCUAUUUAGAGCAUCCUGCAAAUUUUCAGAAAAUUCCGAAUAGUUUACAGUACCGAAAACUAGGUUCAAAGAUGUUGUUUUCCACGAGCAUAAAAAAAUUAGUCACGAGUGCAACAACAUGUUUGAACUUAGUUUUCGGUAUUGUAAACUAUUCAGAAUUUUCUGAAAAUUUGUAGGAUAAUCUAAAUAGCUACAAUAUACACGGUCAUAAAAAAAAAUUGCGUCGAAAACUGUCCACGGGUUGUAAACACUGAGAGCCCUACCAUUAGGGCUUAAAGUGAAGCCCUA	-241	69	69	125	122	385	138	35.8442	-62.5974	-1.74638	.(((((((((((((((((((..((((..(((((((((((((..((((((.((.((((((((((((((((.(((((((((((((((.(((((((((((((((((((((..((((((((((((((((((((((((.(((((((((((((((((((((((((((((((((.((((((((...(((..(..(((.....)))....)..))).)))))))).))))))))))))))))))))))))))))))))).))))))))))))))))))))))))..))))))))))))))))))))).))))))))))))))))))))))))))))))).)).)))))).)))))))))))))..))))..)))))))))))))))))))...	GUAUAUUGUAGCUAUUUAGAGCAU	AAUCUAAAUAGCUACAAUAUACAC	27	0	1	19	9	0	0	11	16	0	0	15	19	0	0	2	18	0	0	24	10	0	0	8	17	0	0	80	255	165	0
miRNA-164	000100F	1377256	1377342	-	UGCUUGUGCAUGGACAGGCGGUGGAUCAAAUAUGAAUUCUUGUGAUAAGAGUUCAUAUUUGUUGCGCUGCCUGUUGUUGCUCAAGU	-47.9	24	13	18	31	86	37	43.0233	-55.6977	-1.29459	.(((((.(((..(((((((((((.(.((((((((((((((((...)))))))))))))))).).)))))))))))..))).)))))	UCAUAUUUGUUGCGCUGCCUGUUG	ACAGGCGGUGGAUCAAAUAUGAAU	8	1	1	4	3	0	0	2	4	2	1	4	1	0	0	1	16	12	0	3	1	0	0	1	10	4	4	4	4	1	0
miRNA-180	000111F	554337	554670	-	UAGGGCUCUCAGUGUUUACAACCCGUGAACAGUUUUCGAAGCGAUUUUUUUUAUGACCGUGUAUAUUGUAGCUAUUUAGAGCAUCCUGCAAAUUUUCAGGAAAUUCCGAAUAGUUUACAGUAUCGAAAACUAGGUUCAAACAUGUUGUUGCACGCGUGACUAAUUUUUUUUAUGCGUGUGGAAAACAACAUGUUUGAACCUAGUUUUCGGUACUGUAAACUAUUCGAAAUUUUCUGAAAAUUUGCAAGAUGCUCUAAACAGCUACAAUAUACAUGGUCAUAAAAAAAAGUCGCACUGAAAACUGUUCACGGGUCGAGAAGUACUGAGAGCCCU	-226.5	65	58	103	107	333	123	36.9369	-68.018	-1.84146	.((((((((((((((((.(.((((((((((((((((((..(((((((((((((((((((((((((((((((((.(((((((((((.(((((((((((((((((((.(((((((((((((((((((((((((((((((((((((((((((((((((((((..........))))))))))....))))))))))))))))))))))))))))))))))))))))))).))))))))))))))))))).))))))))))).))))))))))))))))))))).))))))))))))..)))))))))))))))))).).))).)))))))))))))	GUGUAUAUUGUAGCUAUUUAGAGC	UCUAAACAGCUACAAUAUACAUGG	19	0	0	14	17	0	0	6	33	0	0	14	23	0	0	4	34	0	0	9	148	120	0	6	46	0	0	21	51	0	0
miRNA-190	000117F	1337949	1338319	-	CACUUCAAGCCCUAUCGGUAGGACUUUCAGUUUUCUUGAUCCGUGAACAGUUUUCGACGCAACUUUUUUUAUGACUGUGUAUAUUGUAGCUAUUUAGAGCAUAUUGCAAAUUUUUCAGAAAACUCCGAAUAGUUUACAGUACCGAAAACUAGGUUCAAAUAUGUUGUUUUCCACACGCAUAAAAAAAUUAGUCACGCGUGCAACAACAUGUUUGAACCUAGUUUUCGGUACUGUAAACUAUUCAGAAUUUUCUGAAAAUUUGCAGGAUGCUCUAAAUAUCUACAAUAUACACGGUUAUAAAAAAAAUCGCACCGAAAACUAUUCACAGGUUAUAAAUAAUAAAAGCCCUACCGAUAUGACUUAAAGUCAA	-188	56	69	127	118	370	125	33.7838	-50.8108	-1.504	.((((((((((.(((((((((((((((((...........((((((((((((((((..((((((((((((((.((.(((((((((((((.((((((((((((..((((((((((.((((((((((((((((((((((((((((((((((((((((((((.((((((((....((((((((((.........)))))))))))))))))).))))))))))))))))))))))))))))))))))))))))))))))))))))))..)))))))))))).))))))))))))).)).))))))))))))))..))))))))))))))))...........))))))))))))))))).))))))))))...	GUAUAUUGUAGCUAUUUAGAGCAU	GCUCUAAAUAUCUACAAUAUACAC	24	0	0	32	24	0	0	5	21	0	0	5	203	194	0	0	60	0	0	6	13	0	0	35	95	0	0	25	6	0	0
miRNA-195	000119F	1209430	1209768	-	UUUCGGCACUGUAGAUUAUUCAGAAUUUCUUAAAAAAUUGUAGGAUGUCUACUAUAACUACAGUAUACAUCGUCAUAUAAAAAAAUGGGAUUAUAAUUUCUUCACACACUAAAAACAGAAACGCCCCUACCGGUGGGGACAAAAGGCAUGCCCCUAUUGUAGAAUUUUCCUAGGUAGGGGCAUUACUUUUGCCCCUACCGUAGGGAUGUUUUCUAUUUUUGGUACUUGGAGAAAUUAUGACUCUUUUUUUUUGUAUGAGAGCGUACAUGAUCGUUAUAAUAGCAAUCCCACAAAUUUUUGGGAAAUUUUGAAUAAUUUACAUUGUCGAAUCAUAAUUC	-149.5	59	57	105	117	338	116	34.3195	-44.2308	-1.28879	.(((((((.(((((((((((((((((((((((((((.((((.((((..(((.((((((..((((((...((.(((((((((((((.((..((((((((((((((...((((((((.(((((((.((((((.(((((((.((((((..(((((((((((.(((.......))))))))))))))..)))))).))))))))))))).)).))))).))))))))...))))))))))))))..)).)))))))))))))))..)))).))...)))))).)))..)))).)))).))))))))))))))))))))))))))).))))))).........	GGAAAUUUUGAAUAAUUUACAUUG	CUGUAGAUUAUUCAGAAUUUCUUA	37	16	1	2	34	7	1	0	50	22	0	1	15	7	0	1	39	19	0	1	10	6	1	0	77	31	4	6	44	20	3
miRNA-199	000122F	147292	147649	-	GGAGCUUUAGGGAUCUCAGUGUUUCUUGACCCGUGAACAGUUUUUUGUACGAUUUUUUUUAUGACCGUGUAUAUUGUAGCUAUUUAGAGCAUCUUGGAAAUUUUCAGAAAAUUCUAAAUAGUUUACAAUACCGAAAACUAGGUUCAAACAUGUUGUUUUCCACGCGCAUAAAAAAAUUAGUCACGUGUGCAAUAACAUGUUUGAGUCUAGUUUUCGGUACUGUAAACUAUUCGGAAUUUUCUAAAAAUUUGUAAAAUGCUCUAAAUAGCUGCAAUAUACACGGUCAUAAAAAAACAAAUCGCGCCGAAAACUAUUCACGGGUCAAGAACACUAAGAGUCCCACCAGUAAAGCUUAAA	-197.8	62	61	120	114	357	123	34.4538	-55.4062	-1.60813	.(((((((((((((((.((((((.(((((((((((((.(((((((.(..(((((((((((((((((((((((((((((((((((((((((((.(((.(((((((.(((((((((..(((((((((((.(((((((((((((..((((((((((((((...((((((..(((.....)))....)))))).))))))))))))))..))))))))))))).)))))))))))..))))))))).))))))).))).)))))))))))))))))))))))))))))))))))))...))))))..).))))))).))))))))))))))))))).))).)))).....))))))))...	GUGUAUAUUGUAGCUAUUUAGAGC	UCUAAAUAGCUGCAAUAUACACGG	21	0	0	22	5	0	0	49	26	0	0	11	12	0	0	9	14	0	0	13	142	120	1	6	35	0	0	13	13	0	0
miRNA-222	000141F	1681679	1682013	-	UAAGUUCUACCAGUAGGGCUCUCAGUUCUCAACCCGUGAACAGUUUUCAGCGAUUUUUUUUAUGAUCGUGUAUAUUGUAGCUAUUUAGAGCAUCCUGCAAAUUUUUAGAAAAUUUGAAUAGUUACAGUACCAAAAACUAAGUUCAAACAUGUUAUUGCACGCGAUAUUAUGUGUGUAAACAUGUUUGAACCUAGUUUUCGGUACUAUAAAGUAUUCAGAAUUUUCUGAAAAUUUGCAGGAUGCUCCAAACAACUACAAUAUACACGGUCAUAAAAAAUCGUACUGAAAACUAUUUACAGGUCGAGAACACUGAAAAACCCCACCAAUAAAACUU	-159.6	52	60	116	106	334	112	33.5329	-47.7844	-1.425	.(((((((((..(((((((((((((((((((((((((.((((((((((((((((((((..(((((.(((((((((((((((((((((((((((((((((((((((.((((((((((((((.((((((((((((((((((((((((((((((((....(((.(........).)))..))))))))))))))))))))))))))))))))..)))))).)))))))).))))))))))))))))))))))))))))))))))))))).)))))))))))))..)))))))))))).)))))))))))..)))).))))))))))..)))))))))	GUGUAUAUUGUAGCUAUUUAGAGC	UCCAAACAACUACAAUAUACACGG	9	0	0	10	16	0	0	5	125	101	0	14	9	0	0	4	25	0	0	5	6	0	1	6	26	0	0	15	17	0	0
miRNA-228	000144F	815880	816106	-	AAUGAACGUAUAUAUUGUAGUUGUUUAGAGCAUUCUGUAAAUUUUCAAAAAUUUCGAAUAGUUUACAGUACCGAAAACUAGGUUCAAACAUAUUUUCCACGCUCAUAAAAAAAAUUAGUCACGCAUGCAACAACAUGCUUGAACUUAAUUUUCAGUACUGUAAAUUAUUCAGAAUUUUCUGAAAAUUUGCAGAAUGCUCUAAAUAGCUACAAUAUACACGGUCAUA	-101.9	30	36	85	75	226	66	29.2035	-45.0885	-1.54394	.((((.(((.(((((((((((((((((((((((((((((((((((((((((((..((((((((((((((((.(((((.((((((((..............(((.((.......)).)))...(((((......))))).)))))))).))))).))))))))))))))))..)))))).))))))))))))))))))))))))))))))))))))).))).)))).	GCUCUAAAUAGCUACAAUAUACAC	AUAUAUUGUAGUUGUUUAGAGCAU	17	0	1	10	6	0	0	13	38	0	2	2	17	0	0	2	14	0	0	4	20	0	0	4	11	0	0	9	14	0	1
miRNA-238	000154F	39442	39841	-	AUAGGGGUUUCACUUUUAGCUUUAAUGGUAGGGCUCUCAGUGUUUACAAUUGGUGAACAGUUUUCAGCGCGAAUUUUUUUAUGACCGUGUAUAUUGUAGCUAUUUAGAGCAUUCUGCAAAUUUUCAAAAAAUUCCGAAUAGUUUACAGUACCGAAAACUAGGUUCAAACAUGUUGUUGCACGCGUGACUAAUUUUUUUUAUGCGCGUGGAAAAUAAUAUGCUUGAAUCUAGUUUUCAGUAUUGUAAACUAUUCGAAAUUUUCUGAAAAUAUGCACGAUGCUCUAAAUAGCUACAAUAUACACGGUUAUAAAAAAAGUCGCGCCGAAAACUGUUCAUGAGUCAAGAAACACUAAAAGCCCUACCAAUAAGGCUUAAAGUGAAGUCCCUGAAAAAAAAAUU	-229.1	72	64	134	129	399	136	34.0852	-57.4185	-1.68456	.(((((..((((((((.(((((((.((((((((((.(.(((((((...(((.(((((((((((((.((((((.((((((((((((((((((((((((((((((((((((((((.((((.(((((((.((((((.(((((((((((((((((.(((((((((((((((.(((((((((.((((((((..(((......)))))))))))...))))))))).))))))))))))))).))))))))))))))))).)))))).))))))).)))).)))))))))))))))))))))))))))))))))))))))).)))))).))))))))))))).)))....))))))).).)))))))))).))))))).))))))))..)))))...........	GUAUAUUGUAGCUAUUUAGAGCAU	GCUCUAAAUAGCUACAAUAUACAC	119	0	67	28	12	0	0	50	13	0	0	7	6	0	0	6	15	0	0	11	7	0	0	7	12	0	0	11	39	0	0
miRNA-259	000178F	1367912	1368310	-	CCUAUAGGGGCUUCACUUUAAGCCCUACCGGUAGGGCUCUCAGUGUUUACAACCCGUGAACACUUUUCGGCGCGAUUUUUUUUUAUGACCGUGUAUAUUGUAGCUAUUUAGAGCAUCCUGCAAAUUUUCAGAAAAUUUCGAAUAGUUUACAGUACCGAAAACUAGGUUCAAACAUGUUGUUGCACGCAUGACUAAUUUUUUUUAUGCACGUGGAAAACAUGUUUAAACUUAGUUUUCGGUACUGUAAACUAUUCAGAAUUUUCUGAAAAUUUGCAAGAUGCUUUAAAUAGCUACAAUAUACACGGUCAUAAAAAAAAAUUCGCGUCGAAAACUGUUCACGGGUCGAGAAACACUGAAAACCCUACCGAUAGAGCUUAAAGUGAACCCCUAUAGAAAAA	-259.2	71	76	128	123	398	147	36.9347	-65.1256	-1.76327	.(((((((((.((((((((((((.(((.((((((((...(((((((((...(((((((((((.((((((((((((((((((((((((((((((((((((((((((((((((((((((.(((((((((((((((((((..(((((((((((((((((((((((((((((.(((((((((.((.(((((((((..........))))))..))).))))))))))).)))))))))))))))))))))))))))))..))))))))))))))))))).)))))))))))))))))))))))))))))))))))))))))).)))))))))))).)))))))))))....)))))))))...)))))))).))).))))))))))))))))))))).....	GUGUAUAUUGUAGCUAUUUAGAGC	UUUAAAUAGCUACAAUAUACACGG	27	0	2	24	18	0	0	13	74	0	0	11	16	0	0	6	23	0	1	6	6	0	0	7	59	0	0	14	89	63	0
miRNA-268	000187F	124081	124398	-	UUCAGUGUUUCUCGAUCCGUGAACAUUUUUUGGUGUGAUUUUUUUAUGACUGUAUAUAUUGUAGCUAUUUAGAGCAUCCUGCAAAUUUUCAGAAAAUUUCGAAUAGUUUACAGUACCGAAAACUAGGUUCAAACAUGUUGUUUUCCAAACGCAUAAAAAAAAUUAGUCACGCGUGUAACAACAUGUUUGAACUUAGUUUUCGGUACUGUAAACUAUUCAGAAUUUUCUGAAAAUUUGCAGAAUGCUCUAAAUAGCUACAAUAUACACAGUCAUAAAAAAAAUUACACCGAAAACUAUUCGCGGAUUAAGAACACUGA	-193.4	49	51	110	107	317	100	31.5457	-61.0095	-1.934	.((((((((.((..(((((((((.(.(((((((((((((((((((((((((((.(((((((((((((((((((((((.((((((((((((((((((((..((((((((((((((((((((((((((((((((((((((((((......((((..................))))..))))))))))))))))))))))))))))))))))))))))))..)))))))))))))))))))).))))))))))))))))))))))).)))))))).))))))))))))))))))).).)))))))))..))))))))))	GCUCUAAAUAGCUACAAUAUACAC	AUAUAUUGUAGCUAUUUAGAGCAU	29	0	0	11	42	0	0	3	40	0	0	19	5	0	0	1	19	0	0	3	14	0	0	2	24	0	0	5	22	0	0
miRNA-276	000193F	240406	240777	-	AGGGUAGGUAACCACUUGGUACCCUGUGUUUUUUCAAAGUAUCAUUUUGGUACCAUCUAUUUUAUACAAUGCUCAUAUGGUACCAUGUAUUUUAAAAUCGUACAUAUUUGGUACCCUAAACUCAAAUUUCAUUAAUACAAUUUUACCAAUUUAAUCAAACUGCUAUCAAUUAUGUAAGUUUGAUCAUAUAACUGAUGACAGUUUGAUCAUAUUGACAAAAUUUUAUCUAUCAAAUCUAAGUCUAGGGUAUCAAAUAUGUAUAAUUUUAAAAUAAUAGGGUACCAUAUGAGCAUUAUUGAAAACAAAUGGUACAAAAAUAAUACUUUACAAAAAUAUAAGGUACCAAAUAAGUAAAUUUCCUAUUCAGUUAU	-135	45	53	139	134	371	98	26.4151	-36.3881	-1.37755	.(((((((.....((((((((((.(((((((((..(((((((.(((((.(((((((...(((((...(((((((((((((((((...(((((((((((..((((((((((((((((((.(((.(.((((.((..(((.((((((..((((...(((((((((.(((((.((((((.(......).)))))).))))).)))))))))...))))..)))))).)))..)).)))).).))).))))))))))))))))))..)))))))))))....)))))))))))))))))..)))))....))))))).))))).)))))))..))))))))).)))))))....)))......)))))))......	AUAUAACUGAUGACAGUUUGAUCA	AUCAAACUGCUAUCAAUUAUGUAA	23	0	0	13	6	0	0	6	18	0	1	69	7	0	0	3	14	0	0	11	6	0	0	31	46	0	0	12	13	0	0
miRNA-282	000197F	718058	718229	-	AAAGAAGUAUGGGAGACCCGUCGUAGGAAAGAUGGCACUGGCUACUGCCUGUAAUUGCAGACGUUGUAAAUAUAUAUUUAUACAUAUAUAUAUAUAUGAAGCAUUCGGAUUCAUGAAUGAAGGUAUAGGCAGUGCCAUCUUCUUACGCCAUGAUUCCCAUUGUCUUCUUAA	-64	36	29	53	53	171	65	38.0117	-37.4269	-0.984615	.((((((.(((((((.(..(.((((((((.((((((((((.(((.(((((.............(..((.((((((((........)))))))).))..)..((((((......)))))).)))))))).)))))))))))))))))).)..).)))))))...))))))..	CGUCGUAGGAAAGAUGGCACU	UGCCAUCUUCUUACGCCAUG	10	4	1	0	9	4	0	0	3	3	0	0	7	4	0	0	33	17	0	0	19	9	2	2	42	18	1	0	45	13	0
miRNA-283	000197F	853970	854125	-	AAAGGGGCUACUGUCGCAGGAGAGAUGGCGCCUAAUAGUGUGUGUAUGACAGUACAGAUCAAAUUAAGUGUUAUCAUUUGAUGAUAUAUAGUCCAUACAAUAAUAGGCUCCAUCUCCCCGCGACUGAAGCCCCUUCUACUUUCUUCAUCAAUACG	-62.3	32	34	45	44	155	66	42.5806	-40.1935	-0.943939	.((((((((.(.(((((.((.(((((((.(((((.((.((((((...(((.(((...((((..(((((((....))))))))))).))).))))))))).)).))))).))))))))).))))).).))))))))....................	UCUCCCCGCGACUGAAGCCCC	GGCUACUGUCGCAGGAGAGAUG	70	43	5	0	48	37	0	0	57	30	5	1	46	25	2	0	25	16	0	0	59	35	5	0	102	60	6	0	59	34	3
miRNA-317	000226F	961193	961600	-	CAAUUCUUCUAUAAGGGCUUCACUUUAAGCUCUACUGGUGGGGCUCUCAGUGUUCUCGAUCCGUGAACAGCUUUCGGCGCAAUUUUUUUAUGACCGUGUAUAUUGUAGCUAUUUAGAGCAUCCUGCAAAUUUUCAAAAUAUUCUGAAUAGUUUACAGUACCGAAAACUAGGUUCAAACAUGUUGCUUUCCCGCGCAUAAAAAAAAUUAGUCACGCGUGCAACAACAUGUUUGAACCUAGUUUUCAGUAUUGUAAAUUAUUCAGAAUUUUAUGAAAAUUUGCAAGAUGCUCUAAAUAGCUACAAUAUACAUGGUCAUAAAAAAAAUCGCGCUAAAAUUAUUUCACGGGUCGAGAACACUGAGAGCCCCACCAGUAGGGCUUAAAGUGAAGCCCCUAUAGG…	-279.4	74	80	128	125	407	154	37.8378	-68.6486	-1.81429	.((((((.((((((((((((((((((((((.((((((((((((((((((((((((((((.(((((((....(((..(((((((((((((((((((.(((((((((((((((((((((((((((((((((((((((.((.((((((((((.((((((.(((((((((((((((((((((((((((((..(.((((..(((......)))..)))).)...))))))))))))))))))))))))))))).)))))).)))))))))).)).))))))))))))))))))))))))))))))))))))))).)))))).)))))))))))))..)))....))))))).)))))))))))))))))))))))))))).)))))))))))))))))))))).…	GUAUAUUGUAGCUAUUUAGAGCAU	GCUCUAAAUAGCUACAAUAUACAU	122	0	0	18	13	0	0	6	12	0	0	34	23	0	8	6	10	0	0	19	16	0	3	2	17	0	0	14	16	0	0
miRNA-330	000241F	1289434	1289706	-	CGGCGCAAUUUUUUUUAUGACCGUGUUACGUGUAUAUUGUAGCUAUUUAGAGCAUUUUGCAAAUUUUCAGAAAAUUCCGAAUAGUUUACAGUACCGAAAACUAGGUUCAAACAUAUUGUUGCACGCGUGACUAAUUUUUUUUAUGCGCGUAGAAAACAACAUGUUUAAACCUAGUUUUCUGUACUUUAAAAUAUUCGGAAUUUUCUGAAAAUUUGCAGGAUGCUCUAAAUAGCUACAAUAUACACGGUCAUAAAAAAAAGUCGCGCCAAAAA	-152.1	45	44	91	92	272	89	32.7206	-55.9191	-1.70899	.(((((..((((((((((((((((((.......((((((((((((((((((((((((((((((((((((((((((((((((((.((((.(((((.((((((((((((.((((((.(((((..(((((((..(((......))))))))))....))))).)))))).)))))))))))).))))).)))).))))))))))))))))))))))))))))))))))))))))))))))))))))))))))))))))))))...))))).....	UCUGAAAAUUUGCAGGAUGCUCUA	GAGCAUUUUGCAAAUUUUCAGAAA	49	0	0	2	21	0	0	3	18	0	0	14	18	0	0	1	52	0	0	3	3	0	0	10	10	0	2	1	15	0	0
miRNA-334	000244F	667416	667859	-	AUAGGACAAUUCUUCUAUAGGAGUUUCACUUUAAGCCCUACCAGUGGGGCUCUCAGUGUUUCUCGACCCGUGAACAAUUUUCGGCGCGAUUGUUUUUUACCGUGUAUAUUGUAGCUAUUUAGAGCAUCCAACAAAUUUUCAGAAAAUUCUUAAUAGUUUACAGUACAAAAAACUAGGUUCAAACGUGUUGUUUUCCACGCUCAUAAAAAAAAUUAGUCACGAGUGCAACAACAUGUUUGAACUUAGUUUUCGGUACUGUAAACUAUUUGGAAUUUUCUAAAAAUUUGCAGGAUGUUCUAAAUAGCUACAAUAUACACGGUCAUAAAAAAAAAUACGCCGAAAACUGUUCAAGGGUCGAGAAUACUGAGAGCCCUACCGGUAGAGCUUAAAGUAAAGCCU…	-247.3	75	80	150	138	443	155	34.9887	-55.8239	-1.59548	.((((..(((((((((((((..((((.(((((((((.(((((.(((((((((((((((((.((((((((.((((((.(((((((((..(((.(((((((((((((((((((((((((((((((((((((..((((((((.((((((((((.(((((((((((((((..((((((((((((((((((((((((.....(((((..................))))).))))))))))))))))))))))))..))))))))))))))).)))))))))).))))))))..)))))))))))))))))))))))))))))))...)))))).))).))))))))).)))))).))))))))))))))))))))))))).))))).))))))))).))))..…	GUAUAUUGUAGCUAUUUAGAGCAU	GUUCUAAAUAGCUACAAUAUACAC	38	0	0	36	142	109	0	8	41	0	0	16	12	0	0	10	24	0	0	10	19	0	5	11	31	0	0	28	44	0	19
miRNA-358	000265F	352087	352473	-	AGGGCUUCACUUUAAUACUACCGGUAGGGCACUCAGUGUUUACAACUCGUGAACAGUUUUCAGCGCGAUUUUUUUUUAUGACCGUGUAUAUUGUAGCUAUUUAGAGCAUCUUGUAAAUUUUCAGAAAAUUCUGAAUAGUUUACAGUAUCGAAAAACUAGGUUCAAACAUGUUGUUGCACGCGUGACUAAUUUUUUUUAUGCGCGUGGAAAACAAUAUGUUUGAACCUAGUUUUCGGUACUGUAAACUAUUCGGAAUUUUCUGAAAAUUUUGCAGGAUGCUCUAAAUAGCUACAAUAUACACGCUCAUAAAAAAAAAGUCGCCCCGAAAACUGUUCACAGGUCAAGAAACACUGAAAGCCCUACCGAUAGGGCUUAAAGUGAAGCCU	-245.2	73	70	121	122	386	143	37.0466	-63.5233	-1.71469	.((((((((((((((..(((.(((((((((..(((((((((...((..(((((((((((((.(.(((((((((((((((((.((((((((((((((((((((((((((((((((((((((((((((((((((((((((((((((((((((((((.((((((((((((((((((((.((((((((..(((......)))))))))))...))))))))))))))))))))))))))))))))))))))))))))))))))))))))).))))))))))))))))))))))))))))))))))).)))).))))))))))))).).)))))))))))))..))....)))))))))..))))))))).)))...))))))))))))))	GUGUAUAUUGUAGCUAUUUAGAGC	UCUAAAUAGCUACAAUAUACACGC	48	0	1	23	29	0	1	14	92	0	0	13	24	0	0	62	35	0	1	27	20	0	1	0	43	0	0	47	95	63	1
miRNA-363	000265F	702353	702520	+	GACGAUAUGGAGUGAAGCUAAGAACAUUGAAUCUCGACCAGCCGAGUAGAAAUAUGUCAGUAGUCGGUCUCAAGUCUUAAUAAUAAUUUUUUUUUUUUGCUAAGUCUUAUAAUUUCUGUUCGACUGGUAGAGAUUCAAUCUUUUCUGCAGAUCACUCUUAUCGUAUC	-52.3	31	28	47	61	167	59	35.3293	-31.3174	-0.886441	.((((((.(((((((.((..((((.((((((((((.(((((.(((((((((((..(.(....).)......(((.((((.(((.((.......)).))).)))).)))...))))))))))).))))).)))))))))).))))..))...)))))))))))))...	UCUCGACCAGCCGAGUAGAAA	UCUGUUCGACUGGUAGAGAUU	1774	878	208	0	519	245	97	0	956	389	176	1	296	77	79	0	112	71	14	3	154	38	32	0	632	325	107	8	456	169	121
miRNA-431	000356F	1279342	1279703	-	CCAUUUGGUACCCUGUGUUUUUGCAAAGUAUCAUUUUGGUAUCAUCUGUUUUCAAUAAUGCUCAUAUGGUACCCUGUAUUUUCAAAUCGUACAUAUUUGGUACCCUAAACUCAAAUUUAAUUAAUAAAAUUUUACCAAUUUAAUCAAACUGCUGUCAAUUAUGUAAGUUCCAAAUUUAAAUUUAAUUACUUAAUUACAUAUAACUGAUGACAGUUUGAUCAUAUUGACAAAAUUUUAUCUAUCAAAUCUGAGUCUAGGGUAUCAAAUAUGUAUAAUUAUAAAAUACAAGGUACCAUAUGAGCAUUAUUGAAAACAGAGGGUACUAAAAUAAUACUUUGCAAAAACAUAGGGUACCAAAUGA	-182.6	45	53	133	130	361	98	27.1468	-50.5817	-1.86327	.((((((((((((((((((((((((((((((.(((((((((((.(((((((((((((((((((((((((((((.((((((((..(((..((((((((((((((((((.(((((.((((.((..((((((((((..((((...(((((((((..((((..(((((((......((((.......))))......)))))))....))))..)))))))))...))))..))))))))))..)).)))).))))).))))))))))))))))))..)))..)))))))).))))))))))))))))))))))))))))).))))))))))).)))))))))))))))))))))))))))))).	AAUAAUGCUCAUAUGGUACCCUGU	AAGGUACCAUAUGAGCAUUAUUGA	36	0	3	13	81	40	0	4	32	0	0	5	15	0	0	3	21	0	0	10	76	64	0	1	29	0	0	7	25	0	4
miRNA-449	000377F	1219769	1220164	-	UUAUAGGGGUUUCACUUUAAGCCUUACUGGUGGGACUCUCAGUGUUCUCAACUCGUGAAUAGUUUUUGACGCCGAUUUUUUUUAUAAUCGUGUAUAUUGUAGCUAUUUAAAGCAUCCUGCAAAUUUUCAGAAAAUUCUGAGUAGUUUACAGUACCGAAAAACUAAGUUUAAACAUGUUGCAACGUGACUAAUUUUUUUUAUGCGUGUGGAAAGCAACAUGUUUGAACCUAGUUUUUGGUACUGUAACUAAUCGGAAUUUUCUGAAAAUUUGCAGGAUGCUCUAAAUAGUUAUAACAUAUACGGUCAUAAAAAAAAAAAUCACGCCGAAAACUGUUAACAGGUCGUGAAACACUGAGAGCCCCACCGGGUAGGGCGCUUAAAGUGAAGCUCCUAUA	-210.4	77	66	123	129	395	143	36.2025	-53.2658	-1.47133	.((((((((((((((((((.((((((((((((((.((((((((((((.(.((..((.(((((((((((.((..((((((((((((.(((((((((.(((((((((((((.((((((((((((((((((((((((((((((.(((((.((((((((.((((((((.(((((((((((((((.(((((..(((......)))..))))).....))))))))))))))).))))))))))))))))))))).)))))))))))))))))))))))))))))).))))))))))))).))))))))).)))...))))))))).)).))))))))))).))..)).).).))))))))))).)))))).))))))))...))))))))))))))))))	UCUGAAAAUUUGCAGGAUGCUCUA	AAGCAUCCUGCAAAUUUUCAGAAA	59	0	0	22	18	0	0	7	45	0	0	11	23	0	0	10	17	0	0	12	19	0	0	11	30	0	3	18	24	0	0
miRNA-464	000386F	317653	318071	-	UAGGGAAUAUACUCAUUUGGUACCCUGUGUUUUUGCAAAGUAUCAUUUUGGUACCCUCUGUUUUCAAUAAUGCUCAUAUGGUACCUUGUAUUUUAAAAUCGUAUAUAUUUGGUACCCUAAAUUCAGAUUUGAUAGAUAAAAUUUUGUCAAUAUGAUCAAACUGUCAUCAGUUAUAUGUAAUUAUGUAAUUAAAUUUAAAUUUGUAACUUACCUAAUUGACAGCAGUUUGAUUAAAUUGACAAAAUUUUAUUUAUCAAAUCUGAGUUUAUGGUACCAAAUAUGUACGAUUUUAAAAUACAAGGUAUCAUAUGAGCAUUAUUGAAAACAAAUGGUACCAAAAUGAUACUUUACAAAAACAUAGGAUACCAAAUGAGUAUAUUCCCUUAAAACUAAGUGUCC…	-237.5	54	58	154	152	418	112	26.7943	-56.8182	-2.12054	.(((((((((((((((((((((.((((((((((((.(((((((((((((((((((...((((((((((((((((((((((((((((((((((((((((((((((((((((((((((.((((((((((((((((((((((((((((((((((.((((((((((((..(((((((...(((((((((.((((.......))))))))).)))).)))))))..)))))))))))).)))))))))))))))))))))))))))))))))).))))))))))))))))))))))))))))))))))))))))))))))))))))))))))...))))))))))))))))))).)))))))))))).)))))))))))))))))))))...............…	CAAUAUGAUCAAACUGUCAUCAGU	UGACAGCAGUUUGAUUAAAUUGAC	135	64	0	17	30	0	0	19	33	0	1	38	18	0	0	9	18	0	0	6	8	0	0	1	85	53	0	31	35	0	0
miRNA-492	000440F	764054	764441	-	AGGGUAGGUAACCAUUUGGUACCCUGUGUUUUUGCAAAGUAUCAUUUUGGUACCCCUCUGUUUUCAAUAAUGCUCAUAUGGUACCCUGUAUUUUAAAAAUCGUAUAUAUUUGGUACCCUAAACUCAAAUUUAAUUAAUAAAAUUUUACCAAUUUAAUCAAAUUGCUGUUAGUUAUGUAAGUUCCAAAUUUAAAUUUAAUUACUUAAUUACAUAUAACUGAUGACAGUUUGAUCAUAUUGAUAAAAUUUUAUCUAUCAAAUUGAGUCUAGGGUAUCAAAUAUGUAUAAUUUUAAAAUACAGGGUACCAUAUGAGCAUUAUUGAAAACAGAGGGUACUAAAAUGAUACUUUGCAAAAACAUAGGGUACCAAAUGAGUAAAUUCCCAUUU	-207.5	54	53	138	142	387	107	27.6486	-53.6176	-1.93925	.(((....((..(((((((((((((((((((((((((((((((((((((((((((.((((((((((((((((((((((((((((((((((((((((((...(((((((((((((((((((.((((((.(((.((..(((((((((((.((((...(((((((((..(((((((((((((......((((.......))))......)))))))..))))))..)))))))))...)))).)))))))))))..)).))))))))).)))))))))))))))))))..)))))))))))))))))))))))))))))))))))))))))))))))))))))))))))))))))))))))))))))))))))))..))....)))....	AAUAAUGCUCAUAUGGUACCCUGU	AGGGUACCAUAUGAGCAUUAUUGA	156	88	0	7	17	0	0	4	41	0	0	72	14	0	0	0	65	48	0	5	5	0	0	1	33	0	0	12	100	0	0
miRNA-503	000453F	1111331	1111740	-	AAUUCUUCUAUAGGGGGUUCAUUUUAAGCUUUACUGGUGGGGCUCUCAGUGUUUCUCGACUCGUGAACAGUUUUCGCACGCGAAUUUUUUUAUGACCGUGUAUAUUGUAGCUAUUUAGAGCAUCUUGUAAAUUUUCAAAAAAUUUCAAAUAAUUUAUAGUACCAAAAACUAGGUUUAAACAUGUUGCUUUCCACGCGCAUAAAAAAAAAUUAGUCACGCGUGCAACAACAUGUUUGAAAUUAGUUUUCAAUACUGUAAACUAUUUGGAAUUUUCUGAAAAUUUACAGGAUGCUCUAAAUAGUUUCAAUAUACACGGUCAUAAAAAAAAUUCACGACGAAAACUGUUCACAAGUCGAGAACACUGAGAGCCCCACCGGUAGGGCUUGAAGUGAAGCCCCU…	-256.6	73	71	135	130	409	144	35.2078	-62.7384	-1.78194	.(((((((((((((((.((((((((((((((((((((((((((((((((((((.(((((((.((((((((((((((..((.((((((((((((((((((((((((((.(((((((((((((((((((((((((((((.(((((((((((((.(((((((((...((((((((.(((((((((((((.....((((((..(((.......)))....))))))...))))))))))))).))))))))...))))))))).))))))))))))).))))))))))))))))))))))))))))).)))))))))))))))).)))))))))).)).)))))))))))))).))))))))))))))))))))))))))))))))))))))))))).)))))…	GUAUAUUGUAGCUAUUUAGAGCAU	GCUCUAAAUAGUUUCAAUAUACAC	123	0	0	20	14	0	0	6	48	0	0	11	18	0	0	11	32	0	0	25	3	0	0	4	37	0	0	20	36	0	0
miRNA-512	000472F	416852	417254	-	GGGAAUAUACUCAUUUGGUACCCUGUGUUUUUGCAAAGUAUCAUUUUGGUAUCUGUUUUCAAUAAUGCUCAUAUGGUACCCUGUAUUUUAAAAUCGUACAUAUUUAGUACUCUAAACUCAGAUUUGAUAGAUAAAAUUUUGUCAAUAUGAUCAAACUGUCAUCAGUUAUAUGUAAUUAUGUAAUUAAAUUUAAAUUUGUAACUUACAUAAUUGACAGCAAUUUAAUUUUUAAUUAAAUUGAUAAAAUUUUAUCUAUCAAAUCUGAGUUUAGGGUACCAAAUAUGUACGAUUUUAAAAUAUAAGGUACCAUAUAAGCAUUAUUGAAAAUAGAGGGUACCAAAAUGAUACUUUGCAAGAACAUAAGGUACCAAAUAAUGAUAUUCUCUUAAAACUUUUAUA…	-201.4	52	49	149	152	402	101	25.1244	-50.0995	-1.99406	((((((((....((((((((((.((((((((((((((((((((((((((((((((((((((((((((((.((((((((((.((((((((((((((((((((((((.((((((((((((((((((((((((((((((((((((((((.((((..(((((....)))))...(((((((((((((.(((((....)))))....)))))))))).)))...............)))).)))))))))))))))))))))))))))))))))))))))).)))))))))))))))))))))))).)))))))))).))))))))))))))))))...)))))))))))))))))))))))))))).))))))))))....))))))))..............…	AAUAAUGCUCAUAUGGUACCCUGU	AAGGUACCAUAUAAGCAUUAUUGA	41	0	2	48	49	40	0	6	31	0	2	9	18	0	0	3	15	0	0	7	72	64	0	6	37	0	2	24	34	0	1
miRNA-515	000478F	42579	42729	+	AGGUGUCCAGCAUCGCAUGAUGUGACAUGCGAUAAUUGAUUCAAUUUAAUAUUGGGUCUCACAUAUUUAAAUUUACAAUAAAAUAUGUGAAAUUCAAUAUUAAAAUGCACCAAUAACCGUAUGCCGCAUCAUGUGGUGUUGGGCAUCACA	-70.8	27	25	51	47	150	52	34.6667	-47.2	-1.36154	.(((((((((((((((((((((((.((((((...((((...((.(((((((((((((.((((((((((............)))))))))).))))))))))))).))...))))...)))))).)))))))))))))))))))))))...	AUUUAAUAUUGGGUCUCACAUAUU	UAUGUGAAAUUCAAUAUUAAAAUG	20	7	1	4	17	9	0	0	22	12	0	4	18	10	0	2	21	5	0	1	9	3	0	2	29	19	0	3	21	11	0
miRNA-534	000497F	477840	477967	-	AUAGGUCAUCACUAUAGACAUACAUAUUUCCCUCUUCUUUCGAUAGGUCGUCACAACAUGUCGUCGCUAUAGGGUUCCUCGACGAAAAAGAAGAGGGAAAUAUAUAUGUCUAUAGUGACGACCUAAU	-61.9	24	26	40	37	127	50	39.3701	-48.7402	-1.238	.((((((.((((((((((((((.(((((((((((((((((.(((.....)))........((((((....(((...))))))))).))))))))))))))))).)))))))))))))).))))))..	UCACUAUAGACAUACAUAUUUCCC	GAAAUAUAUAUGUCUAUAGUGACG	59	21	10	0	121	53	15	0	167	62	28	2	110	47	32	0	60	16	10	0	46	19	12	0	60	29	10	0	41	17	5
miRNA-584	000569F	339143	339581	-	AUAUAGGACAAUUUUUUUAUAGGGGCUUCACUUUAAGCCCUACCGAUAGGGCUUUCAGUGUUUCUCUACCCGUGAACAGUUUUCGACGCGACUUUUUUUAUGACCGUGUAUAUUGUAGCUAUUUAGAGCAUCCUGCAAAUUUUUAGAAAAUUCCGAAUAGUUUACAGUACCGAAAAUUAAGUUGAAACAUGUUGUUUUCCACGAGCAUAAAAAAUAUUAGUCACGUGUGCAACAGCAUGUGUGAACCUAGUUUUCGGUACUGUAAAUUAUUCAGAAUUUUCUGAAAAUUUGCAGGAUGCUCUAAAUAGCUACAAUAUACACGGUCAUAAAAAAUUCGCGCCGAAAACUGUUCACAGGUUGUAAACACUGAAAGCCCUACCGGUAGGGCUUAAAGUGAGC…	-281.1	82	80	135	141	438	162	36.9863	-64.1781	-1.73519	.((((((..((((((((((((((((((.(((((((((((((((((.(((((((((((((((((..(.(((.((((((((((((((.(((((..((((((((((((((((((((((((((((((((((((((((((((((((((((((((((((.(((((((((((((((((((((((((.(((.(.((((((((((...((((....(((......)))....))))...)))))))))).).))).))))))))))))))))))))))))).)))))))))))))))))))))))))))))))))))))))))))))))))))))))))))).))))).)))))))))))))).))).).))))))))))))))))).))))))))))))))))))))…	GUAUAUUGUAGCUAUUUAGAGCAU	GCUCUAAAUAGCUACAAUAUACAC	45	0	0	41	26	0	0	7	25	0	0	12	22	0	0	11	31	0	0	5	20	0	0	4	35	0	0	70	14	0	0
miRNA-596	000581F	374340	374589	-	GAUUUUUUUAUGACUGUGUAUAUUGUAGCUAUUUAGAGCAUCCUGCAAAUUUUCAGAAAAUUUCGAAUAAUUUACAGUACCGAAAAUUAGGUUCAAACGUAUUGUUUUCCACGUGCAUAAAAAAAAGGUAGUCACGCGUGCAACAACAUGUUUGAACUUAGUUUUUGGUACUGUAAAUUAUUCGGAAUUUUCUGAAAAUUUACAAGAUGCUCUAAAUAGCUACAAUAUAGACGAUUAUAAAAAAAAUCG	-135.8	40	34	89	86	249	74	29.7189	-54.5382	-1.83514	(((((((((((((.(((.((((((((((((((((((((((((.((.((((((((((((((((((((((((((((((((((((((((((((((((((((((.(((((...((((((...................)))))).))))).)))))))))))))))))))))))))))))))))))))))))))))))))))))).)).)))))))))))))))))))))))).))).)))).))))))))).	GUAUAUUGUAGCUAUUUAGAGCAU	GCUCUAAAUAGCUACAAUAUAGAC	11	0	0	7	12	0	0	17	23	0	0	10	201	194	0	2	24	0	0	5	0	0	0	0	51	0	0	5	15	0	0
miRNA-615	000625F	648532	648938	-	CGUGGAUAACAAUAUGUUUAAACCAAGUUUUCGGUACUGUAAAUUAUUUGGAAUUUUUUGAAAACCGCGUUGAUGCUCUAAAUAAUUACAAUAUACACGGAUAUAAAAAAAAAAUUCACCGAAAAUUGUUCAAAGGUCGAGAACACUGAGAGCCCCACCACCGAUUGGGCUUAAAGUGAAGCCUCUAUAUGAGAAUUCUCUUAUAUAUAUAUAUGUGUGACAAUUCUCUUAUUUAAGCCCUACUGGUGGGACUCUCAGUGUUCCCGACCCGUGAACAGUUUUCGGUGCGAUUUUUUUUUAUGAUCAUGUAUAUUGUAGCUAUUUAGAGCAUCCUGCAAAUUUUCAGAAAUUCAUAAUAGUUUACAGUACCGAAAACUAAAUUCAAACAUGUUAUUAUUG…	-190.8	67	69	133	137	406	136	33.4975	-46.9951	-1.40294	.((.(((((.(((((((((......(((((((((((((((((((((((..((((((((.(((((..(((..(((((((((((((.((((((((((((.((.((((((((((((...((((((((((((((((..(((((.((((((((((((.(((((((......(((((((((..((....)).....(((((((.((.((((((....)))))).)).)))))))...)))))))))...))))))).)))))))))))).)))))..))))))))))))))))...)))))))))))).)).)))))))))))).))))))))))))).)))...)))))))))))))..)))))))))))))))))))))))......))))))))).))))).…	GUAUAUUGUAGCUAUUUAGAGCAU	GCUCUAAAUAAUUACAAUAUACAC	13	0	0	13	11	0	0	15	30	0	0	6	11	0	0	3	18	0	0	5	2	0	0	0	24	0	0	27	25	0	3
miRNA-617	000625F	770352	770553	+	UUAUUUGGAUUAGUGGUAAGUCCAUUGAUUCUUAAAAAGGAGGUGGAGGGUUCAAUUCCUCAUCAUCACAUUAUUUGGUAAUAAUAAAAUGGGGCUAAAAGCAGAUAAAAUAUAUUAUUGCUAAAAAAUGUGAGGAUGAGAAAUUGAAACUCCCACCUUCUCUUUAACAAUCAUUGGACUCACCACCAAUCCAAAUAUAUU	-92.7	34	31	73	63	201	65	32.3383	-46.1194	-1.42615	.((((((((((.(((((.((((((.(((((.(((((.(((((((((.((((((((((.((((((.(((((((.(((((((((((((.......((.....))..........))))))))))))).))))))).)))))).))))).)))))))))))))).))))).))))).)))))).))))).))))))))))....	UGAGAAAUUGAAACUCCCACCUUC	AGGUGGAGGGUUCAAUUCCUCAUC	2	0	0	3	0	0	0	4	3	0	0	3	6	0	0	0	140	36	6	3	1	0	0	1	200	56	11	4	101	26	2
miRNA-637	000647F	201861	202143	-	CGAACAGUUUUCAGCGCGAUUUUAUUUUAUGGCCGUGUAUAUUGUAGCUAUUUAGAGCAUCUUGCAAAUUUUCAGAAAAUUCUGAAUAGUUUACAGUACUGAAAAUUAUAUUCAAAUAUGUUGUUGCAUGCGUGACUAAUUUUUUUUAUGCGCAUAAAAAUAACAUGUUUGAACCUAUUUUUCGGUAUUGUAAACUAUUCAGAAUUUUCUGAAAAUUUGCAGAAUGCUCUAAAUAGCUACAAUAUACACUGCCAUAAAAAAAUUGUGCCGAAAACUGUUCAC	-168.2	43	42	93	104	282	85	30.1418	-59.6454	-1.97882	.(((((((((((.((((((((((..((((((((.((((((((((((((((((((((((((..(((((((((((((((((((((((((((((((((((((((((((.((..(((((((((((((((..(((((((..(((......))))))))))...)))))))))))))))..)).)))))))))))))))))))))))))))))))))))))))))))..)))))))))))))))))))))))))).)))))))))))))))))).)))))))))))..	GUAUAUUGUAGCUAUUUAGAGCAU	GCUCUAAAUAGCUACAAUAUACAC	12	0	0	8	120	109	0	3	67	0	0	7	39	0	0	5	11	0	0	6	3	0	0	0	28	0	0	2	16	0	0
miRNA-640	000647F	771301	771679	-	AGCUUCACUUUAAGUCCUACUGGUAGGGCUCUCAGUGUUUCUCUACCCGUGAACAGUUUUCAGCACGACUUUUUUUUAUAACCGUGUAUAUUGUAGCUAUUUAGAGCAUCCUGCAAAUUUUCAGAAAAUUUCGAAUAGUUAACAGUACCGAAAACUAAGUUCAAACAUGUUGUUUUCUACGCGUAUAAAAAAAAUUAGUCAUGCGUAUAACAAUAUGUUUGAACUUAGUUUCGGUACUGCAAGCUAUUCGGAAUUUUUUGAAAAUUUGCAGGAUGAUCUAAAUAGCUACAAUAUACACAGUCAUAAAAAAAAUCGCGCCGAAAACUAUUCACGGAUUAUAAACACUGAGAGCCCUACCGACAAGGCUUAAAGUGAAGU	-227.2	64	69	126	119	378	133	35.1852	-60.1058	-1.70827	.(((((((((((((.(((..((((((((((((((((((((......(((((((.(((((((.((.(((.((((((((((.((.((((((((((((((((((((((.((((((((((((((((((((((((((((((((((..(((((((((((.((((((((((((((((((((...(((((((.(((......)))...))))))).)))))))))))))))))))))))))))))))..)))))))))))))))))))))))))))))))))).)))))))))))))))))))))).)).))))))))))))).)).))))))).))))))).....))))))))))))))))))))...))))))))))))))))	GUAUAUUGUAGCUAUUUAGAGCAU	GAUCUAAAUAGCUACAAUAUACAC	211	185	0	15	28	0	0	13	27	0	2	11	14	0	0	9	12	0	0	9	8	0	0	7	20	0	0	23	28	0	4
miRNA-645	000655F	752813	752971	+	CUUCACCGUCAUCAUCAUCCUCCUCUUCGUCUUCAUCUUCGGCGGCUUCUUCGUCUUCCAACGGUAGCGACGGAGGCGAGAGCAGUAGCGCCGCUAGCGGAAGCGCCAGCAGUGACGGAGGUGACGGUGAAGAGGAGAAUGGCGAAGAGGUGGAUAAC	-71.6	50	42	34	32	158	92	58.2278	-45.3165	-0.778261	.((((((.((.((..(((.(((((((((..(.(((((((((...((((..((((((.((..((....))..)))))))))))).....(((.(((.(((....))).))).))).))))))))).)..))))))))).)))..)).))))))))....	CCUCUUCGUCUUCAUCUUCGG	GGAGGUGACGGUGAAGAGGAG	36	26	1	2	17	14	0	4	37	24	0	3	28	16	0	2	71	23	0	2	12	9	1	1	38	20	2	1	23	11	0
miRNA-665	000686F	382414	382556	-	GUCAGCUGUCCCCUAGAGUUUCCUCGAACACUUCACUGGGAACUUUUAUCAAACCAUAGAUUGUGAAGGGUGCAAUGAUGAUAAGCCCACUGAAGUGUUUGGGGGAACUCUGGUUGCCAUCUGACUUUGAUUAACAAUAACA	-56	32	30	39	41	142	62	43.662	-39.4366	-0.903226	(((((.((.(..(((((((((((((((((((((((.((((.....((((((.(((.............)))....))))))....)))).)))))))))))))))))))))))..).)).))))).................	GUUUCCUCGAACACUUCACUG	CUGAAGUGUUUGGGGGAACUC	63	8	13	0	27	3	4	0	181	35	20	9	23	5	0	0	88	19	12	0	37	4	2	0	150	36	50	0	65	13	12
miRNA-699	000746F	615407	615814	-	CAAUUUUUUUAUAGGCGCUUCACUUUAAGUCUUAUUGGUAGGACUCUUAGUAUUUCUCGAUCCGUGAAUAGUUUUCAGCGCGACUUUUUUUAUGACCGUGUAUAUUGUAGCUAUUUAGAGCAUCCUGCAAAUUUUUAGAAAAUUCCGAAUAGUUUACAUUACCGAAAACUAGGUUCAAACAUGUUGUUUUCUACGCGUAUAAAAAAAAUUAGUCACGCGUGCAACAUGUUUGAACCUAGUUUUCGGUAUUGUAAACUAUUCAGAAUUUUCUGAAAAUUUGCAGGAUGCUCUAAAUAGCUACAAUUUACACGGUCAUAAAAAAUAAUCGCGCCGAAAACUAUUCACGAGUUGUAAAUACUAAGAGCCCUACCGACAGGGCUUAAAGUGAAGCCCUUAUAG…	-264.8	69	71	130	137	407	140	34.398	-65.0614	-1.89143	.((((((((((((((.(((((((((((((((((.((((((((.((((((((((((..(((..((((((((((((((.((((((..(((((((((((((((((.((((((((((((((((((((((((((((((((((((((((((.((((((((((((.((((((((((((((((((((((((((((.....((((((.(((......)))...)))))))))))))))))))))))))))))))))).)))))))))))).)))))))))))))))))))))))))))))))))))))))))).)))))))))))))))))...)))))).))))))))))))))..))).)))))))))))).)))))))).))))))))))))))))).)))))))…	GUAUAUUGUAGCUAUUUAGAGCAU	GCUCUAAAUAGCUACAAUUUACAC	50	0	0	16	41	0	0	9	34	0	0	8	16	0	0	7	30	0	0	0	17	0	0	7	54	0	1	83	18	0	0
miRNA-744	000839F	772568	772995	-	AUGGACAAUUCUUCUAUAGGGGCUUCACUUUAAGCCCUAUCGAUGGGGCUCUCAGUGCUUCUCGACCCUUGAACAGUUUUCGACGCAAUUUUUUUUUUACCGUGUAUAUUGUAGCUAUUUAGAGCAUCCUGCAAAUUUUUAGAAAAUUCCGAAUAGUUUACAGUACUGAAACUAGGUUCAAACAUGUGAUUUCCAAGCGCAUAAAAAAAAUUAGUCACGCAUGUAACAAUAUGUUUGAACUUAGUUUUCGGUACUGUAAACUAUUUAGAAUUUUCUGAAAAUUUGCAGGAAGCUCUAAAUAGCUACAACAUACACAGUCAUAAAAAAAAUCGCGCUAAAAACUGUUCACAGGACGAGAACACUGAAAGUCCCACCAAUAUAGCUUAAAGUGAAGCUCCU…	-222.9	68	82	146	131	427	150	35.1288	-52.2014	-1.486	.(((..((((.((((((((((((((((((((((((..(((.(.(((((((.((((((.((((((.((..(((((((((((...(((.(((((((((..((.((((((.(((((((((((((((((.(((((((((((((((((((((((..((((((((((((((((((((((((((((((((((((......((.(((..(((......)))....))).)).....)))))))))))))))).))))))))))))))))))))..))))))))))))))))))))))).))))))))))))))))).)))))).))...))))))))).)))...)))))))))))..)).)))))))))))).))))))).).)))..))))))))))))))))))…	GUAUAUUGUAGCUAUUUAGAGCAU	GCUCUAAAUAGCUACAACAUACAC	19	0	0	19	121	109	4	9	31	0	0	10	10	0	1	3	16	0	0	9	2	0	0	3	39	0	5	14	14	0	1
miRNA-767	000874F	55955	56362	-	CAAUUCUUCUAUAGGGACUUCACUUUAAGCCCUACCGGUAGGGCUUUCAGUGUUUCUCGACCUGCGAACAGUUUUCGGCGCGAUUUUUUUUUAUGACCGUGUAUAUUGUAGCUAUUUAGAGCAUCCUGCAAAUUUUCAAAAAAUUCUGAAUAGUUUACAGUAACGAAAACUAGGUUCAAACGUGUUGUUUCCACUCGCAUAAAAAAAAUUAGUCAUGCGUGCAACAACAUGUUUGAACCUAGUUUUCGGUACUGUAAACUAUUCGGAAUUUUCUGAAAAUUUGCAGGAUGCUCUAAAUAGCUACAAUAUACACGGUCAUAAAAAAAUCGCACCGAAAACUGUUCACGGGUUGUAAACACUAAGAGCCCUACCGAUAGGGCUUAAAAUAAAGCCCCUAUA…	-275.4	74	80	128	125	407	154	37.8378	-67.6658	-1.78831	.((((((.(((((((((((((((((((((((((((((((((((((.(((((((((..(.(((.((((((((((((((((((((((((((..(((((((((((((((((((((((((((((((((((((((((((((((((((((((.(((((((((((((((.((((((((((((((((((.(((((((..((..(((((((..........))))))))).))))))).)))))))))))))))))).))))))))))))))).))))))))))))))))))))))))))))))))))))))))))))))))))))))))))))))))))))))))))))))))).))).).))))))))).))))))))))))))))))))))))))))))))))))…	GUGUAUAUUGUAGCUAUUUAGAGC	UCUAAAUAGCUACAAUAUACACGG	24	0	0	19	8	0	0	13	26	0	0	43	22	0	0	7	15	0	0	8	24	0	0	6	37	0	0	14	73	63	0
miRNA-769	000875F	313321	313659	-	UUGGGGCUCUCAGUGUUCUCAACCCAUGAACAGUUUUCAGCGCGAUUUUUUUUAUGAUCGUGUAUAUUGUAGCUAUUUAGAGCAUCCUGUAAAUUUUCAGAAAAUUCCGAAUAGUUUACAAUACCGAAAACUAAGUCCAAACAUGUUGUUGCACGCGUGACUAAUUUUUUUUAUGCGCGUGGAAAACAACAUGUUUGAACCUAGUUUUCAGUACUGUAAACUAUUCGGAAUUUUCUGAAAAUUUGCAAGAUACUCUAAAUAGCUACAAUAUACAUGGUCAUAAAAAAAAUUGCGCCGAAAAUUGUUCACGGGUCGAGAAACAUUAAGAACCCCACCAG	-203	59	62	109	108	338	121	35.7988	-60.0592	-1.67769	.(((((.(((.(((((((((.((((.((((((((((((.(((((((((((((((((((((((((((((((((((((((((((.(((.(((((((((((((((((((((((((((((((((.(((.((((((((.((.(((((((((((((.((((((((..(((......)))))))))))...))))))))))))).)).)))))))).))).))))))))))))))))))))))))))))))))).))).))))))))))))))))))))))))))))))))))))))))))).)))))))))))).)))).))).)))))).))).)))))....	GUGUAUAUUGUAGCUAUUUAGAGC	UCUAAAUAGCUACAAUAUACAUGG	56	0	0	5	20	0	0	3	147	101	3	6	32	0	0	8	32	0	0	10	9	0	0	3	43	0	0	12	32	0	0
miRNA-832	001003F	180548	181057	-	UUGUAUAUAUAUAUAUAUAUAUAUUUAUAUAUAUAGGGAAAUUCUCCUAUAGAGGCUUCACUUUUAAGCCUUACCGGUAGGGCUCUUAGUGUUGACAACCCUUGAACAGUUUUCGGCGAGAUUUUUUUUUUUAUGAUCAUGUAUAUUGUAGCUAUUUAGAGCAUCCUGCAAAUUUUCAGAAAUUUCCGAAUAGUUUACAGUACCGAAAACUAGGUUCAAACAUGUUGUUGCACCCGUGACUAAUUUUUUUUAUGCGCGUGGAAAACAACAUGUUUGAACCCAGUUUUCAGUGCUGUAAACUAUUUGGAAUUUUCUAAAAAUUUGCAGGAUGCUCUAAAUAGCUACAAUAUAUACGGUCAUAAAAAAAAUCGAGUUAAAAACUGUUCACGGAUCGAGAAA…	-269.7	84	73	177	175	509	157	30.8448	-52.9862	-1.71783	.(((((((((((((((((((((((.(((((.((((((..((((...((((((.(.(((((((((.((((((...(((((((((((((((((((......((.(((((((((((..((..(((((((((...(((((((.(((((((((((((((((((((((((((((((((((((.(((((.((((((((((((((((((((.(((((((.(((((((((((((((((...((((((..(((......)))..)))).))..))))))))))))))))).))))))).)))))))))))))))))))).))))).))))))))))))))))))))))))))))))))))))).))))))))))))))))..))..))))))))))).)).......))…	GUAUAUUGUAGCUAUUUAGAGCAU	GCUCUAAAUAGCUACAAUAUAUAC	60	0	0	22	11	0	0	6	92	0	0	17	14	0	0	5	25	0	0	4	20	0	0	10	33	0	0	53	47	0	3
miRNA-878	001070F	167841	167957	-	ACGAGCUGAUGUUGCGUCCUUCCAAUUGGUCGGCAGCCUGCAAAAGCUAUAAGCUGACUGCAUGAUAGCUUUUGCAGGCUUCCUACCAAUCAGAAGGCGCCACAUGACUCGUGUUA	-62.2	28	30	28	30	116	58	50	-53.6207	-1.07241	(((((.(.((((.(((.(((((..((((((.((.((((((((((((((((..((.....))...)))))))))))))))).)).))))))..)))))))).)))).))))))....	AUUGGUCGGCAGCCUGCAAAAGCU	CUUUUGCAGGCUUCCUACCAAUCA	68	56	2	3	32	28	0	1	44	32	1	0	68	57	0	1	42	33	2	0	55	44	0	1	66	53	5	0	42	35	0
miRNA-888	001103F	439247	439582	-	AGUAGAGCUCUCAGUGUUUCUCGACCCGUGAACAGUUUUCAAUGCGAUUUUUUUUUACCGUGUAUAUUGUAGCUAUUUAGAGCAUUCUGCAAAUUUUUCAUAAAAUUCCGAAUAGUUUACAGUACCGAAAACUAAGUUCAAACAUGAUGUUACACGCGUGUCUAAUUUUUUUAUGCGUGUGGAAAGCAACAUGUUUGAACUUAGUUUUUGGUACUGUAAACUAUUCAGAAUUUUCUGAAAAUUUGCAGGAUGCUCUAAAUAGCUACAAUAUACACGGUAAAAAAAAAAUCGCAUUGAAAACUGUUCACGGGUCGAGAAACACUGAGAGCUCUACC	-245.6	60	57	106	112	335	117	34.9254	-73.3134	-2.09915	.((((((((((((((((((((((((((((((((((((((((((((((((((((((((((((((((((((((((((((((((((((((((((((((((.((.(((((((.(((((((((((((((((((((((((((((((((((((.(((((((((((((...........))))))))))....))).))))))))))))))))))))))))))))))))))))).))))))).))))))))))))))))))))))))))))))))))))))))))).))))))))))))))))))))))))))))))))))))))))))))))))))))))).	GUAUAUUGUAGCUAUUUAGAGCAU	GCUCUAAAUAGCUACAAUAUACAC	55	0	0	7	122	109	0	10	21	0	0	8	19	0	0	42	27	0	0	12	19	0	0	7	25	0	0	11	28	0	0
miRNA-898	001128F	543	724	+	AUUAAAGCUUAAAUUUAACAAUAAAGACUUUGGCUUGAUGGUUAAACUGAUUUAUAUGAAUCUUAAUGACAUGGUUUCAAAUCCCAGUAAGUGUAAUUUUAUUUAAAGGUAUAUGAAUUAGCUUAAUCAUCAAAGCCAACAUCUUUAUUUUUAAUGGUGCUUUAAAUAAUAUCAAUUACUC	-46.8	23	22	66	70	181	45	24.8619	-25.8564	-1.04	.(((((((......((((.((((((((..((((((((((((((((.((((((((((((........(((.......)))....((..((((((......))))))..)))))))))))))).))))))))).)))))))..)))))))).))))....)))))))................	AAUAAAGACUUUGGCUUGAUGGU	CAUCAAAGCCAACAUCUUUAUUUU	277	240	15	0	99	74	11	1	224	196	10	1	52	46	4	0	38	16	9	2	8	8	0	0	123	85	15	1	120	92	11
miRNA-910	001144F	368103	368260	-	CUUCACCGUCAUCAUCAUCCUCCUCUUCGUCUUCAUCUUCGGCGGCUUCUUCGUCUUCCAACGGUAGCGACGGAGGCGAGAGCAGUAGCGCCGCUAGCGGAAGCGCCAGCAGUGACGGAGGUGACGGUGAAGAGGAGAAUGGCGAAGAGGUGGAUAA	-71.6	50	41	34	32	157	91	57.9618	-45.6051	-0.786813	.((((((.((.((..(((.(((((((((..(.(((((((((...((((..((((((.((..((....))..)))))))))))).....(((.(((.(((....))).))).))).))))))))).)..))))))))).)))..)).))))))))...	CCUCUUCGUCUUCAUCUUCGG	GGAGGUGACGGUGAAGAGGAG	42	26	1	1	21	14	0	1	38	24	0	2	37	16	0	1	63	23	0	1	25	9	1	0	38	20	2	0	25	11	0
miRNA-930	001174F	706466	706555	+	GCGUCCUUCCAAUUGGUCGGCAGCCUGCAAAAGCUAUAAGCUGACCGCAUGAUAGCUUUUGCAGGCUUCCUACCAAUCAGAAGGCGCCA	-51.4	21	26	22	20	89	47	52.809	-57.7528	-1.09362	(((.(((((..((((((.((.((((((((((((((((..((.....))...)))))))))))))))).)).))))))..))))))))..	AUUGGUCGGCAGCCUGCAAAAGCU	CUUUUGCAGGCUUCCUACCAAUCA	66	56	2	0	33	28	0	0	43	32	1	1	72	57	0	0	38	33	2	0	48	44	0	1	66	53	5	1	41	35	0
miRNA-935	001192F	619498	619871	-	GGGCAGGUAACCAUUUGGUACCCUGUGUUUUUGCAAAGUAUCAUUUUGGUACCAUCUGUUUUCAAUAAUGCUCAUAUGGUACCCUGUCUUUUAAAAUCGUACAUAUUUGGUACCCUAAACUCAAAUUUAAUUAAUAAAAUUUUACCAAUUUAAUCAAACUGUUAUCAAUUAUGUAAGUUCCAAAUUUAAAUUUAAUUACUUAAUUACAUAUAACUGAUGACAGUUUGAUCAUAUUGACAAAAUUUUAUCUAUCAAAUAUGUAUAAUUUUAAAAUACAAGGUACCAUAUGAGCAUUAUUGAAAACAGAGGGUACCAAAAUGAUACUUUGCAAAAACAUAGGGUACCAAAUGAGUAAAUUCCCUAUAAAAAUUAA	-180.1	46	55	140	132	373	101	27.0777	-48.2842	-1.78317	(((.(..((..((((((((((((((((((((((((((((((((((((((((((.(((((((((((((((((((((((((((((.(((.(((((((((..(((((((((((((...((((......))))....((((((((((..((((...(((((((((((((((..(((((((......((((.......))))......)))))))....)))))))))))))))...))))..)))))))))).)))))))))))))..))))))))).))).))))))))))))))))))))))))))))).))))))))))))))))))))))))))))))))))))))))))..))..).)))............	AAUAAUGCUCAUAUGGUACCCUGU	AAGGUACCAUAUGAGCAUUAUUGA	83	0	0	12	63	40	0	5	31	0	0	10	37	0	0	3	18	0	0	11	70	64	0	9	41	0	0	5	22	0	4
miRNA-968	001264F	429418	429731	+	UAGAGGAGUGCUAACAAAAACCUCCUAUUUCAAUCUCUUAGUCAACUUCCGCCCCAAAAACACAUGUCAGAUUUUUUUUUCAUAGCGUGUUAGUUGUAGUUACGACAUCCUUUGAAUAGUUUACUGUGUCCAAAAUAUGUUUGUAUUUUGGUUUUUGUUUGGGCACGGUAAACUAUUCAGAAUCUUUCAAAAAUUUGCAGGAAGGAUGUCGUAACUACAACAAAUGCUGUCAUAAAAAAAAUUCGACAUGUGCUUUUGGGGGCGGAGGUUAACUAAGAGGUUGAAGUAGGAAUUUGACCGUAGCACUCCUCUU	-167.7	62	54	92	105	313	116	37.0607	-53.5783	-1.44569	.((((((((((((.....((..((((((((((((((((((((.((((((((((((.((((((((((((..(((((((((..(((((((....((((((((((((((((((.(((((((((((((((((((((((......(((.....)))......)))))))))))))))))))))))..((((.(((....))).)))).))))))))))))))))))..)))))))...)))))))))..)))))))).)))).)))))))))))).))))))))))))))))))))..)).....)))))))))))).	UCAAUCUCUUAGUCAACUUCCGCC	CGGAGGUUAACUAAGAGGUUGAAG	43	12	9	1	20	4	3	66	30	14	0	9	27	14	4	0	28	13	4	1	8	3	3	0	71	31	12	1	32	11	7
miRNA-969	001264F	429439	429710	+	CUCCUAUUUCAAUCUCUUAGUCAACUUCCGCCCCAAAAACACAUGUCAGAUUUUUUUUUCAUAGCGUGUUAGUUGUAGUUACGACAUCCUUUGAAUAGUUUACUGUGUCCAAAAUAUGUUUGUAUUUUGGUUUUUGUUUGGGCACGGUAAACUAUUCAGAAUCUUUCAAAAAUUUGCAGGAAGGAUGUCGUAACUACAACAAAUGCUGUCAUAAAAAAAAUUCGACAUGUGCUUUUGGGGGCGGAGGUUAACUAAGAGGUUGAAGUAGGAA	-146.3	54	44	79	94	271	98	36.1624	-53.9852	-1.49286	.((((((((((((((((((((.((((((((((((.((((((((((((..(((((((((..(((((((....((((((((((((((((((.(((((((((((((((((((((((......(((.....)))......)))))))))))))))))))))))..((((.(((....))).)))).))))))))))))))))))..)))))))...)))))))))..)))))))).)))).)))))))))))).)))))))))))))))))))).	UCAAUCUCUUAGUCAACUUCCGCC	CGGAGGUUAACUAAGAGGUUGAAG	43	12	9	1	20	4	3	66	30	14	0	8	27	14	4	0	28	13	4	0	8	3	3	0	71	31	12	1	32	11	7
miRNA-971	001270F	423282	423483	+	CGAUUGUUGUUAUAUGACACCUUAGGAGUCCAGCAUCGCAUGAUGUGACAUGCGAUAAUUGAUUCAAUUUAAUAUUGGGUCUCACAUAUUUAAAUUUACAAUAAAAUAUGUGAAAUUCAAUAUUAAAAUGCAUCAAUAACCGUAUGCCACAUCAUGUGAUGUUGGGCAUCACAUGGUGCCUUAUAGCAAUAUUCUUACCUU	-89.7	33	34	65	69	201	67	33.3333	-44.6269	-1.33881	.((.((((((((((.(.((((....((((((((((((((((((((((.((((((...((((((.((.(((((((((((((.((((((((((............)))))))))).))))))))))))).)).))))))...)))))).)))))))))))))))))))).))....)))).).)))))))))).)).......	AUUUAAUAUUGGGUCUCACAUAUU	UAUGUGAAAUUCAAUAUUAAAAUG	11	7	1	1	9	9	0	0	13	12	0	2	12	10	0	1	8	5	0	1	5	3	0	0	21	19	0	1	15	11	0
miRNA-1020	001329F	434040	434334	-	UGACCUGUGAACAGUUUUUGGCGCGAUUUUUUUUUAUGAUCAUGUAUAUUGUAGCUAUUUAGAGCAUCCUGCAAAUUUUCAGAAAUUUCGAAUAGUUUACAGUACCGAAAACUAGGUUCAAACAUGUUGAUUUCCACGUGCAUAAAAAAAUUAAUCACGCAUACAACAACAUGUUUGAACUUAGUUUUCGGUACUAUAAACUAUUCGGAAUUUUAUGAAAAUUUGCAGGAUGUUCUAAAUAGCUACAAUAUACAUGGUCAUAAAAAAAACUGCACCGAAAAUUGUUUACGGGUC	-183.6	48	46	100	100	294	94	31.9728	-62.449	-1.95319	.((((.((.((((.((((.(((((...((((((((((((.(((((((((((((((((((((((.(((((((((((((((((.(((((.((((((((((((((((((((((((((.((((((((((((((...(..(((((...............)))))..)...)))))))))))))).)))))))))))))))))))))))))).)))))..))))))))))))))))).))))))))))))))))))))))).))))))))))))..))))).)))).)))).)).))))	GUAUAUUGUAGCUAUUUAGAGCAU	GUUCUAAAUAGCUACAAUAUACAU	25	0	0	11	11	0	0	9	37	0	0	9	6	0	0	1	17	0	0	12	3	0	0	4	38	0	3	33	20	0	0
miRNA-1021	001331F	595870	596276	-	GCUUCUUUUGAAGCUUUACUAGUGAGACUCUCAGUGUUAUCGACUCAUGAAUAGUUUUUGGCACGAUUUUUUUUAUGACCGUGUAUAUUGUAGCUAUUUAGAGCAUCCUGCAAAUUUUCAGAAAAUUCCGAAUAGUUUACUGUACUGAAAACUAAGUUCAAACAUGUUGUUGCACGCUUCACUAAUUUUUUUAUGCGAGUGGAAAACAACAUGCUUUAACUUAGUUUUCGAUACUAUAAACUAUACAGAAUUUUCUGAAAAUUUGCAAGAUGCUCUAAACAAUUACAAUAUACACGGUCAUAAAAAAAAAUUCGUGCAAAACACUAUUCACGGGUUGAGAACACUGAAGAGCCCCAACAGUAAGGCUUAAAGUGAAGUUAAAGAAUUGUUGUUGCGAAA…	-186.1	69	65	138	134	406	134	33.0049	-45.8374	-1.38881	.((((..((.((((.((((((.((((((((((((((((.((.((.((((((((((.(((.((((((((((((((((((((((((((((((((..((((((((((((((((((((((((((((((((((((.(((((((((.((((.((((((((((((.((((((((((((.(((...(((((((.....))).)))))))...)))))))))))).)))))))))))).)))).))))))))).))))))))))))))))))))))))))))))))))))..))))))))))))))))))))))))))..)))))).))).)))))))))).)).)).))))))).))))))))).)))))).)))).))..))))......................…	GUGUAUAUUGUAGCUAUUUAGAGC	UCUAAACAAUUACAAUAUACACGG	24	0	0	12	16	0	0	4	35	0	0	10	8	0	0	21	43	0	0	8	127	120	0	4	15	0	0	5	8	0	0
miRNA-1028	001345F	316760	317108	-	GUACCCUGUGUUUUUGCAAAGUAUCAUUUUGGUAUCCUAUGUUUUCAAUAAUGCUCAUAUGGUACCCUGCAUUUUAAAAUCGUAUAUAUUUGGUACCCUAAAUUCAAAUUUAAUUAAUAAAAUUUUACCAAUUUAAUCAAACUGCUGUCAAUUAUGCAAGUUCCAAAUUUAAAUUUAAUUACUUGAUUACAUAUAACUGAUGACAGUUUGAUCAUAUUGACAAAAUUUAAUCUAUCAAAUCUGAGUCUAGGGUAUCAAAUAUGUAUAAUUUUAAAAUACAGGGUACCAUAUGAGCAUUAUUGAAAACAGAUGGUACCAAAAUAAUACUUCAAAAAAACAUAGGGUACA	-157.2	43	50	130	125	348	93	26.7241	-45.1724	-1.69032	(((((((((((((((...((((((.(((((((((((...((((((((((((((((((((((((((((((.((((((((((..((((((((((((((((((.(((((.((((.((..((.(((((((..((((...(((((((((..((((.((((((((((...((((....))))....)))))......))))).))))..)))))))))...))))..))))))).))..)).)))).))))).))))))))))))))))))..)))))))))).))))))))))))))))))))))))))))))...))))))))))).))))))...))))))))))))))).	AUAUAACUGAUGACAGUUUGAUCA	AUCAAACUGCUGUCAAUUAUGCAA	17	0	0	17	12	0	0	12	22	0	0	30	13	0	0	6	21	0	0	5	8	0	0	3	43	0	0	18	23	0	1
miRNA-1034	001351F	303913	304303	-	CCUGUAGGGAUUUCACUUUAAACCUUGUCGGUAGGGCUCUCAGUGUUUACAACCCGUGAAUAGUUUUCGGCGCGAUUUUUUUUAUAACCGUGUAUAUUGUAGCUAUUUAGAGCAUCCUACAAAUUUUCAGAAAAUUCUGAAUAGUUUACAGUACCGAAAACUAGGUUCAAACAUGUUGUACGCAUAACUAAUUUUUUUUAUGCUCGUGGAAAACAACAUGUUUGAACCUAGUUUUCGGUACUGUAAAUUAUUUGGAAUUUUUUGAAAAUUUGCAGGAUGCUCUAAAUACCUACAAUAUACACGGUCAUAAAAAAAUCACGUCAAAAACUGUUCAUGGGUCGAGAAACACUAAGAGCCCUACCGGUAAGGCUUAAAGUGAAGCCCUAUAGA	-245.7	71	69	123	127	390	140	35.8974	-63	-1.755	.((((((((.(((((((((((.((((..((((((((((((.(((((((...((((((((((((((((.((((.(((((((((.((.((((((((((((((((.(((((((((((((((.((((((((((((((((((..((((((((((((((((((((((((((((((((((((((((((((((((..........))))))..)).....))))))))))))))))))))))))))))))))))))))))..)))))))))))))))))).))))))))))))))).)))))))))))))))).))))))))))).)))).))))))))))))))))....))))))).))))))))))))..)))).))))))))))))))))))).	UUGUAGCUAUUUAGAGCAUCCUA	GGAUGCUCUAAAUACCUACAAUA	44	0	0	26	20	0	0	9	31	0	1	8	23	0	0	16	22	0	0	4	14	0	0	4	45	0	0	19	55	30	0
miRNA-1061	001395F	449818	450195	-	AAAAAUAAUCAUUGUGGUAAUGACAUUAUUUUGUAAGAUGGGUGGAGAAGUAUUUGCUUUCUUUUUUCCUUAUAGGUUCACUAAUUUCUUUUAUUACUAAAUUUAGUAAAUAUGUGAAUGAUAAUCAUUACCACACAAAUGAUUCUCAUUCACCACCCUAACGAUACUUUUACUUAAGGUGAGUGAGAAUCAUUUGUAUGGUAAUGGUUCUCUUUCAUAUGUUUACUAAAAUUUAUUAAUAGGAGAAUUUGGUAGGGCCUACCUAAACUAAGGAGAAAAGAAUGAGAAUGCUUCUCCUUUUAUUUCCUAAAAGAAUGCCAUUACCGGUAAUGAUUAUUUUAUCUUUUUAUUAAUAUUUUUCUACUUAAAAACAAAAA	-153.7	54	50	126	147	377	104	27.5862	-40.7692	-1.47788	.(((((((((((((((((((((.((((.(((((..(((((((.((((((((((((...((((((((((((((((((((((((((.(((((((((((.(((((((((((((((((((((.((.(((((((((((.((((((((((((((((((((.......................)))))))))))))))))))).))))))))))).)).)))))))))))))).))))))).))))))))))).))))).))))))).......))))))))))))))...)))))))))))).)))))))..))))).)))).))))))).)))))))))))))).....................................	AUUACCACACAAAUGAUUCUCAUU	UGAGAAUCAUUUGUAUGGUAAUGG	232	129	3	1	121	62	2	1	145	77	2	0	151	81	2	0	107	43	5	0	43	17	1	0	244	104	3	1	155	53	1
miRNA-1065	001400F	87613	87998	-	UAGGAUUUCACUUUAAGCCCUACCGGUAGGGCUCUCAGUGUUCUCAACCCGUUAACAGUUUUUGAUACGAUUUUUUUUAUGACCGUGUAUAUUGUAGCUAUUUAGAGCAUCCUGCAAAUUUUCAGAAAAUUCCGAAUGAUUUACAGUACUGAAAACUAAGUUCAAAUAUUUUGUUUCACGCGUAACUAAAUUUUUUUAUUCGUAUGGAAAUCAACAUUUUGAACCUAAUUUUCGGUACGGUAAACUAUUUGGAAUUUUCUGAAAAUUUACAGUAUGCUCUAAAUAGCUACAAUAUACAUGGUCAUAAAAAAAAAAUCACAUCAAAAACUGUUCACAAAUCGAGAAUACUAAGAGCCUCAUCGAUAGGGCUUAAAGUGAAGCCUUG	-198.5	60	66	128	131	385	126	32.7273	-51.5584	-1.5754	.(((.(((((((((((((((((.((((..((((((.(((((((((.....((.(((((((((((((..((((((((((((((((((((((((((((((((((((((((((.(((.(((((((((((((((((((((((.(((((.((((((((((.((.(((((((.......(((((..((....((((....))))..))..)))))........))))))).)).)))))))))).))))).))))))))))))))))))))))).))).)))))))))))))))))))))))))))))))))..)))))))))..))))))))))))).)).....))))))))).))))))..)))).))))))))))))))))))))..	GUGUAUAUUGUAGCUAUUUAGAGC	UCUAAAUAGCUACAAUAUACAUGG	12	0	0	15	12	0	0	46	34	0	0	5	15	0	0	3	34	0	0	10	131	120	0	3	12	0	0	4	18	0	1
miRNA-1101	001491F	582464	582684	-	CAGAAUGAAGAUCUUUUGUCAGAUUAUUGUGUCUCGUAAUGUGUCAAACUAAUAUAAUACUGACAUUUAAUUUAAUUUUUUUUCAUUAAAAAACUAUUACAUCCCCUAUUAAUAUGAAGUGUCAAAAUUAAAUAAGGUGUUAGUAUUAUAUUGGUUGGACAUAUUAUGAGACACAAUAAUCUGACAGAGUAUGUUGAUUCUCAUAUAUUUACGAAUAAAA	-89.6	30	25	81	84	220	55	25	-40.7273	-1.62909	.(((((.((.((.((((((((((((((((((((((((((((((((.((((((((((((((((((((((.((((((((((.((((((...........................))))))....)))))))))).)))))))))))))))))))))).)))))))))))))))))))))))))))))))).)).)).)))))...................	AUUAUAUUGGUUGGACAUAUUAUG	UAAUGUGUCAAACUAAUAUAAUAC	60	23	1	4	39	20	0	0	75	36	1	1	44	14	1	1	39	7	0	3	9	0	0	2	66	21	1	0	63	25	2
miRNA-1102	001491F	584810	585171	-	AGCCAUUUGGUAUCCUGUGUUUUAUCGAAAUACAUAUUUAGUACCCUGUGAUUUCAAUAAUGCUUAUUUGAUAUCUUGUAAUUUAAAAUUAUACAUAUUUGGUACUUUACACUUAAAUUUAAAUAAUAAAAUUUUAUUAAUAUGACCAAAUUGCUCUCAAUUUUAUGUAAUUAAAUUUGAGUUUGAAACUCAUUAUUGGGACAGUUUGGUCAUAUUCAUAAAAUUUUAUUGAUUUUUUUUUUAGUCCAAGGUACCGAAUAUGUACAAUUUCAUUUUACAGGAUACUAGAUGAGUAUUAUUGAAAACAUAGGGUACUAAGUAUAUAUUACGAUAAAACACAUAAUAUCAAAUGAGUAUUUAU	-156.1	45	40	127	149	361	85	23.5457	-43.241	-1.83647	.((((((((((((..((((((((((((.((((.(((((((((((((((((.(((((((((((((((((((.((((((((((..(.(((((.(((((((((((((((((..(((.(((...(((((((((((((((((.(((((((((((((((.(((((((...(((...((((((....))))))....))).)))))))))))))))))))))).))))))))))))).))))...))).)))..))))))))))))))))).))))).)..)))))))))).))))))))))))))))))).))))))))))))))))).)))).))))))))))))..)))))))))).))......	ACCCUGUGAUUUCAAUAAUGCUUA	AGUAUUAUUGAAAACAUAGGGUAC	124	65	16	4	53	26	3	2	115	62	12	2	43	8	7	2	75	44	0	1	22	7	0	0	108	56	0	7	87	45	0
miRNA-1125	001540F	37575	37716	+	CUAAGCAAAUCCAGCCAUAGGGCAUCCACUCAUUGGCAAGCAAUAUUUCUGUUCUAAUAUGGGCAGUUUCUAAUAUAUAUUAAGUGUCAUAUGCCUUGCCAAGAGGAGUUGCCCUGUAGCUGUUUUGGCUUAUUAUUUUUU	-48	27	27	36	51	141	54	38.2979	-34.0426	-0.888889	.(((((.((..((((.((((((((.(..(((.((((((((((......((((((......))))))....((((....)))).........)).)))))))))))..).)))))))).))))..)).))))).........	UGCCAAGAGGAGUUGCCCUGU	AGGGCAUCCACUCAUUGGCAAG	2	1	0	0	1	1	0	0	1	1	0	0	3	3	0	0	19	16	1	0	4	3	1	15	12	11	0	1	11	11	0
miRNA-1127	001540F	92379	92526	+	CUAAGCAAAUCCAGCCAUAGGGCAUCCACUCAUUGGCAAGCAAUAUUUCUGUUCUGAUAUGGGCAGUUUCUAAUAUAUAAUUAAGUGUCAUAUGCCUUGCCAAGAGGAGUUGCCCUGUAGCUGUUUUGGCUUAUUAUUUUUUUUAUA	-48	28	27	38	54	147	55	37.415	-32.6531	-0.872727	.(((((.((..((((.((((((((.(..(((.((((((((((......((((((......))))))........((((......))))....)).)))))))))))..).)))))))).))))..)).)))))..............	UGCCAAGAGGAGUUGCCCUGU	AGGGCAUCCACUCAUUGGCAAG	3	1	0	0	1	1	0	0	1	1	0	0	3	3	0	0	19	16	1	0	4	3	1	15	12	11	0	1	11	11	0
miRNA-1134	001556F	121606	121976	-	UCACUUUAAGUCCUACCAGUGGGGCUCUCAGUGUUCUCGAUCUUUGAACAGUUUUCGGUGCAAUUUUUUUUUAUGACAAUGUAUAUUGUAGCUAUUUAGAGCAUCGGCGCGAUUUUUAGAAUAUUCUGAAUAGUUUACAGUACCGAAAAACUAGGUUCAAACAUGUUUUGCAUGCGUGACUAAUUUUUUUUAUGCCCAUGGAAAGUAACAUGUUUGAACUUAGUUUUCGGUACUGUAAAUUAUUUAUAAUUUUAUGAAAAUUUGCAGGAUGCUCUAAACAGUUACAAUAUACACAAUCAUACAAAAAUCGCACCGAAAACUGUUCACGGGUCAAGAACACUGAGAACCCCACCGAUAAAGCUUAGAGUGG	-190.8	67	64	114	125	370	131	35.4054	-51.5676	-1.45649	.((((.((((..((((((((((((((((((((((((((((.(..((((((((((((((((((((((((...((((((.((((((((((((.((((((((((((((..(((.(((((......(((...((((.((((((((((((((((.(((.(((((((((((((((.((((.(....(((......)))..).)))).))...))))))))))))).))))))))))))))))))).))))...)))......)))))..))).)))))))))))))).)))))))))))).)))))).))))))))))))))))))))))))..).))))))))))))))))))))))))))))..)))).)))).	GUAUAUUGUAGCUAUUUAGAGCAU	GCUCUAAACAGUUACAAUAUACAC	47	0	0	30	17	0	0	15	28	0	0	27	16	0	0	18	24	0	0	25	8	0	0	4	197	150	0	25	23	0	1
miRNA-1144	001574F	237829	238222	-	UUAGGGUAGGUAACUAUUUGGUAUCUUGUGUUUUUGCAAAGUAUUAUUUUGGUACCCUCUGUUUUCAAUAAUGCUCAUAUGGUACCCUGUAUUUUAAAAUUGUACAUAUUUGGUACCCUAAACUCAAAUUUAAUUAAUAAAAUUUUACCAAUUUAAUCAAACUGCUGUCAAUUAUGUAAGUUCCAAAUUUAAAUUUAAUUACUUAAUUACAUAUCAAUGAUGACAGUUUGAUCAUAUUGACAAAAUUUUAUCUAACAAAUCUGAGUUUAGGGUAUCAAAUAUGUAUAAUUUUAAAAUACAAGGUACCAUAUGAGCAUUAUUGAAAAUAGAGGGUACAAAAAUGAUACUUUGCAAAAACAUAGGAUACCAAAUGAGUAAAUUCCCUAUUUUUUA	-201.9	51	50	143	149	393	101	25.6997	-51.374	-1.99901	.(((((....((..((((((((((((((((((((((((((((((((((((.(((((((((((((((((((((((((((((((((((.(((((((((((((((((((((((((((((((((((((((.((((.....((((((((((..((((...(((((((((..((((..(((((((......((((.......))))......)))))))....))))..)))))))))...))))..)))))))))).....)))).))))))))))))))))))))))))))))))))))))))).))))))))))))))))))))))))))))))))))).))))))))))))))))))))))))))))))))))))..))....))))).......	AAUAAUGCUCAUAUGGUACCCUGU	AAGGUACCAUAUGAGCAUUAUUGA	169	88	0	9	21	0	1	19	37	0	2	7	12	0	0	5	67	48	0	10	9	0	0	13	40	0	0	17	21	0	0
miRNA-1165	001621F	84651	85085	-	AAUAUAUAUAUCAUAAUUUUUUUAUUGGGUUUUACUUUAAGUCCUAAUGAUGGAGCUCUCAGUAUUUUUUUAAUCUGUAAACAAUUUUUGGAGUGAUUUUCUUUAUAAACAUGUAUAUUGUAGCUAUUUAGAGCAUCUACAAAUUUUCAGAAAAUUCUGAAUAGCUUACAGUACCGAAACCUAGGUUCAAAUAUGUUACACGUGUGACUAAUUUUUUUUAUGUGCGUGGAAAGCAACAUAUUUUAACCUAGUUUUCGGUACUGUAAAAUAUUCAAAAUUUUCUAAAAAUUUGCAGAUGCUCUAAACAACUACAAUAUACAUGGUCUUAAAAAAAAUCGCGUCAAAAACUGUUCACGGGUCGAGAACACUAAAGAACCCAACCGGUAGAGCUUAAAGUGA…	-169.8	61	63	156	154	434	124	28.5714	-39.1244	-1.36935	.((((((((((.(((((((((.(((.(((((((((((((((..(((..(.(((.(.(((.(((...((((..((((((.((((.((((((..((((((((.((((....((((((((((((((...((((((((((((.((((((((.((((((((.((((((..((((((((((((((.(((((((.(((((((((.((((..((..(((......)))))..))))......))))))))).))))))).))))))))))))))..)))))).)))))))).)))))))).))))))))))))...))))))))))))))....)))).))))))))..)))))).)))).))))))..)))).)))..))).)))).)...)))..))))))))))…	GUAUAUUGUAGCUAUUUAGAGCAU	GCUCUAAACAACUACAAUAUACAU	23	0	0	10	11	0	0	3	11	0	1	5	12	0	0	5	12	0	0	1	11	0	0	2	162	150	0	10	11	0	2
miRNA-1178	001644F	297200	297517	-	CGGCGCUAUUAGUGUUCUUAAUCUGUAAACAAUUUUCGGCGCAAUUUUAUUUAUGACCGUGUAUAUUGUAACUAUUUAAAGCAUCCUGUAAAUUUUUAGAAAAUUCCGAAUAGUUUACAGUACCGAAAACUAGGUUCAAACAUGUGUUGCACGCGUGGAAAACAACAUGUUUGAAUCUAGUUUUCGAUAAUGUAAACUAUUCGGAAUUUUCUGAAAAUUUGCAGAAUGCUCUAAAUAGCUACAAUAUACACGGUCAUAAAAAAAAAUCACGCCGAAAACUAUUUACAGGUCAAGAAACACUGAGAGCCCCACCAAUA	-169.8	51	56	113	97	317	107	33.7539	-53.5647	-1.58692	.((.(((.(((((((((((.(((((((((.(.(((((((((..(((((.(((((((((((((((((((((.(((((((.(((((.((((((((((((((((((((((((((((((((((.((.((((((((((((((((((((((.((.((....)).))....)))))))))))))))))))))).)).)))))))))))))))))))))))))))))))))).))))).))))))).)))))))))))))))))))))..)))))..))))))))).).))))))))).))).)))))))).))).)).......	GCUCUAAAUAGCUACAAUAUACAC	GUAUAUUGUAACUAUUUAAAGCAU	13	0	1	10	17	0	0	3	22	0	0	95	19	0	0	7	12	0	1	4	16	0	0	2	35	0	1	11	12	0	0
miRNA-1183	001659F	261708	262073	-	AAGUCCUAUCAGUAGGACUCUCAAUGUUUCUUAACUCGUGAACAGUUUUCGGCGAGACUUUUUUUAUGACAGUGUAUAUUGUAGCUAUUUAGAGCAUCCUACAAAUUUUCAGAAAAUUCUGAAUAGUUUACAGUACUGAAAAUUAGGUUCAAACAUGUUAUUUUCCACGUGUAUAAAAAAAAUUAGUCAUGCGUGCGACAACACAUUUGAACCUAGUUUUCGGUACUGUAAACUAUUAGGAAUUUUCUGAAAAUUUGCAGGAUGCUCUAAAUAGCUACAAUAUACAUAAUCAUAAAAAUAAAUCGUGCCGAAAACUGUUAACAGAUUGAGAACACUGAGAGCUCUACCGAUAGGACUAAAAAUGA	-199.4	61	59	129	116	365	120	32.8767	-54.6301	-1.66167	.(((((((((.((((..((((((.((((.(((((((.((.((((((((((((((.((...(((((((((..(((((((((((((((((((((((((((((.(((((((((((((((((((.((((((((((((((((((((((((((((((((..((((....(((((((((.(((......)))...))))))).)).))))..)))))))))))))))))))))))))))))))).))))))))))))))))))).)))))))))))))))))))))))))))))..)))))))))....)).)))))))))))))).)))).))))))))).))))))..)))).)))))))))........	UCUGAAAAUUUGCAGGAUGCUCUA	GAGCAUCCUACAAAUUUUCAGAAA	59	0	0	28	21	0	0	4	36	0	0	7	16	0	0	7	10	0	0	8	12	0	0	2	40	0	0	13	74	0	0
miRNA-1217	001726F	489027	489217	+	GAUAUUUGCGGCAAAAAGUAUUCAAGUUUUAUGAAUUUGCAUUUAAGUGCCAAUUUUUUAUUUUGCGGCAAAAGUACCAAAGUUCAACUUAAAAAAAAAACGAUGCAUUGUGUACUUUUUCCGUCAAAAAAAUAAUUUGGGUACUUAGUGCAAUAUUUUGUAUAACUUGGGUACUUUUGCCGCAAAUAUC	-73.8	31	26	64	69	190	57	30	-38.8421	-1.29474	((((((((((((((((.(((((((((((.((..((.(((((((.(((((((.(((.(((.((((((((.(((((((((((.((((................)).)).))).)))))))).))).)))))))).)))...))))))))))))))...))..)).)))))))))))))))))))))))))))	ACUUGGGUACUUUUGCCGCAAAUA	UUUGCGGCAAAAAGUAUUCAAGUUU	57	24	8	0	38	15	2	0	33	11	3	0	18	6	0	0	20	6	1	1	4	0	0	0	8	1	0	1	16	5	0
miRNA-1256	001813F	251827	251976	-	GGCACCCAUUGCCCUCGUUCCCCAGCAGCCAUGAAACCUCCUUCACUAUAGCUACCGCACUUCUCGGACCAGGCCCUCUCCAGUCCGACAAGUGCGAUGGCUAGUGAAAUAGGUUUCAUGGCUGCUGGGGAACGAGGGCAAUGGUUGUC	-113.3	38	47	31	33	149	85	57.047	-76.0403	-1.33294	((((.((((((((((((((((((((((((((((((((((..((((((..(((((.(((((((.((((((..((......)).)))))).))))))).)))))))))))..)))))))))))))))))))))))))))))))))).))))	UUCCCCAGCAGCCAUGAAACC	UUUCAUGGCUGCUGGGGAACG	87	47	1	74	38	27	0	34	63	29	11	54	48	30	2	42	10	1	0	7	54	41	1	52	24	13	0	21	12	5	0
miRNA-1257	001813F	251831	251973	+	ACCAUUGCCCUCGUUCCCCAGCAGCCAUGAAACCUAUUUCACUAGCCAUCGCACUUGUCGGACUGGAGAGGGCCUGGUCCGAGAAGUGCGGUAGCUAUAGUGAAGGAGGUUUCAUGGCUGCUGGGGAACGAGGGCAAUGGGU	-116.7	45	35	31	31	142	80	56.338	-82.1831	-1.45875	.((((((((((((((((((((((((((((((((((.((((((((((.(((((((((.((((((..(.......)..)))))).))))))))).)))..))))))).))))))))))))))))))))))))))))))))))..	UUCCCCAGCAGCCAUGAAACC	UUUCAUGGCUGCUGGGGAACG	74	47	1	87	34	27	0	38	53	29	11	63	42	30	2	48	7	1	0	10	52	41	1	54	21	13	0	24	6	5	0
miRNA-1280	001890F	170695	171080	-	AGGGCUUCACUUUAAGCCCUAUCGGUAGGGCUCUCAGUGUUUCUUGAUCCGUGAACAAUUUUCGGUACGAUUUUUUUUAUGACCGUGUAUAUUGUAGCUAUUUAGAGCAUCCUGCAAAUUUUCAGAAAAUUCCAAAUAGUUUACAAUACCGAAAACUAGGUUCAAACAUGUUGUUUUCCACGCGCAUAAAAAAAAUUAGUCACGCGUUGCAACAACAUGUUUGAACCUAGUUUUCGGUACUGUAAACUAUUCAGAAUUUUCUGAAAAUUUGCAGGAUGCUCUAAAUAGCUACAAUAUACAUAGUCAUAAAAAAAAAUCGCGCCGAAAACUGUUCACGGGUUGAGAACACUGAGAGCCCUACCGGUAAGGCUUAAAGUGAAGCCCC	-273.5	71	76	122	116	385	147	38.1818	-71.039	-1.86054	.(((((((((((((((((.((((((((((((((((((((((.((..(((((((((((.(((((((..((((((((((((((((..(((((((((((((((((((((((((((((((((((((((((((((((..(((((((((((.(((((((((((((((((((((((((((((..(.(((((..(((......)))....))))).).))))))))))))))))))))))))))))).)))))))))))..)))))))))))))))))))))))))))))))))))))))))))))))..))))).)))))))))))..))))))).)))))))))))..)))))))))))))))))))))))).))))))))))))))))).	GUGUAUAUUGUAGCUAUUUAGAGC	UCUAAAUAGCUACAAUAUACAUAG	21	0	0	6	21	0	0	47	36	0	0	8	22	0	0	3	50	0	0	5	143	120	0	0	36	0	0	4	24	0	0
miRNA-1294	001953F	374482	374921	-	CAGGACAAUUUUUCUAUAGGGGCUUCACUUUAAGCCCUAUCGAUGGGGCUACCAGUGUUUCUCAACCCGUGAAUAGUUUUCGGCGCAAUUUUUUUAUGACCGUGUAUAUUGUAGCUAUUUAGAGCAUCCUACAAAUUUUCAGAAAAUUCCGAAUAGUUUACAAUACCAAAAACUAGGUUCAAACAUGUUACUUUCCACUCGCAUAAAAAAAAUUAGUUACGCGUGCAACAUGUUUAAACUUAAUUUUCGGUACUGUAAACUAUUCGGAAUUUUCUGAAAAUUUGUAGGAUGCUCGAAAUAGCUACAAUAUACACAGUCAUAAAAAAAUCGCACUAAAAAUUAUUCUCAGGUCGAGAACACUGAGAGCCCCACUGGUAGGACUUAAAGUGAAGCCCUAUG…	-229.6	69	88	147	135	439	157	35.7631	-52.3007	-1.46242	.(((..(((((((((((((((.((((((((((((.(((((((.(((((((..(((((((.(((.(((.(.((((((((((..(.((.(((((((((((((.(((((((((((((((((((.(((((((((((((((((((((((((((((((((((((((((.((((.((((.((((((.(((((((((......(((.((..(((......)))....)).))).))))))))).)))))).)))).)))).))))))))))))))))))))))))))))))))))))))))).))))))))))))))))))).))))))))))))).)).)..)))))))))).).))).))))))))))..))))))).))))))).)))))))))))))))))))…	GUAUAUUGUAGCUAUUUAGAGCAU	GCUCGAAAUAGCUACAAUAUACAC	130	0	0	11	13	0	0	5	31	0	0	10	12	0	0	10	50	0	0	10	13	0	0	3	36	0	0	9	32	0	0
miRNA-1301	001965F	345828	345988	+	CUAAGCAAAUCCAGCCAUAGGGCAUGUCCUCUGUGGCAAGCAAUAUUAAUGUUUACAUUCUAAUAUAUGGGCAUAGUUUCCAAUAUUAGGUAUCAUUAAUUAGUAUGUAUGCCUUGCCAAGAGGAGUUGCCCUGUAGCUGUUUUGGCUUAAUAUAUUCUU	-62.1	31	28	44	57	160	59	36.875	-38.8125	-1.05254	.(((((.((..((((.((((((((..((((((.(((((((((((((((((........((((((((.((((.......))))))))))))........))))))))...)).)))))))))))))..)))))))).))))..)).)))))..........	UGCCAAGAGGAGUUGCCCUGU	AGGGCAUGUCCUCUGUGGCAAG	2	1	0	0	2	1	0	0	1	1	0	0	3	3	0	0	19	16	2	0	3	3	0	14	15	11	3	0	11	11	0
miRNA-1302	001965F	476042	476221	+	ACUCUUACUUCACUAAGCAAAUCCAGUCAUGGGGCAUCCACUCUUUGGCAAGCAAUAUUUUUUAUUGUAAUAUGGGCAGUUUCCGGCCAAUAUAUUAUUAGGUGUCAUUAAACGAUAUCGAUGACUUGCCAAGAGGAGUUGCCCUGUAGCUGUUUUCGCUUAUUAUUUUUAUAGAGGUA	-54.4	35	33	47	64	179	68	37.9888	-30.3911	-0.8	.((((........(((((.((..(((..((((((((.(..(((((.((((((((............(((((((((((........)))..))))))))..((((((.......))))))..)).)))))))))))..).))))))))..)))..)).)))))..........))))...	UGCCAAGAGGAGUUGCCCUGU	GGGGCAUCCACUCUUUGGCAAG	1	1	0	1	1	1	0	2	1	1	0	3	4	3	1	0	22	16	4	0	3	3	0	15	16	11	2	1	16	11	4
miRNA-1304	001965F	597362	597478	+	AAGCCACAGGGCAUCCACUCAUUGGCAAGCAAUAUUUCUGUUCUGAUAUGGGCAGUUUCUAAUAUAUAUUAAGUGUCAUAUGCCUUGCCAAGAGGAGUUGCCCUGUAGCUGUUUUG	-41.5	26	23	29	38	116	49	42.2414	-35.7759	-0.846939	.(((.((((((((.(..(((.((((((((((......((((((......))))))....((((....)))).........)).)))))))))))..).)))))))).)))......	UGCCAAGAGGAGUUGCCCUGU	AGGGCAUCCACUCAUUGGCAAG	1	1	0	0	1	1	0	0	1	1	0	0	3	3	0	0	19	16	1	0	4	3	1	14	12	11	0	1	11	11	0
miRNA-1383	002194F	328953	329357	-	AAAGAGAAUAUACUCAUUUGGUACAUUGUGUUUUUGCAAAGUAUCAUUUUGGUACCCUCUGUUUUCAAUAAUGCUCAUAUGGUACCCUGUAUUUUAAAAUCAUACAUAUUUGGUACCCUAAACUCAGAUUUGAUAGAUAAAAUUUUGUCAAUAUGAUCAAAUUGUCAUUAGUUAUAUGUAAUUAUGUAAUUAAAUUUAAAUUUGUAACUUACAUAAUUGACAACAGUUUAAUUAAAUUGACAAAAUUUUAUCUAUCAAAUCUGAGUUUAGGGUACCAAAUAUGUACGAUUUUAAAAUACAGGGUACCAUAUGAGCAUUACUGAAAACAAAGGGUACCAAAAUGAUACUUUACAAAAAUAUAAGGUACCAAAUGAGUAUAUUCCCUUAAAAAAAUUAUAA…	-233.4	51	51	157	145	404	102	25.2475	-57.7723	-2.28824	.(((.(((((((((((((((((((.(((((((((((.(((((((((((((((((((((.((((((((.(((((((((((((((((((((((((((((((((.((((((((((((((((((((((((((((((((((((((((((((((((((.((((.(((((((..(((((..((((((((((((.((((.......))))))))).))))))))))))..))))))).)))).)))))))))))))))))))))))))))))))))))))))))))))))))).))))))))))))))))))))))))))))))))).)))))))).))))))))))))))))))))).))))))))))).))))))))))))))))))).))).............…	UUGGUACCCUAAACUCAGAUU	UCUGAGUUUAGGGUACCAAAU	108	54	10	60	32	0	6	7	16	0	0	11	15	0	0	7	16	0	0	15	18	0	0	2	55	0	0	22	38	0	0
miRNA-1427	002293F	488542	488747	-	AAAGAAAAGGAGAAAAUGGAGUCACGAUAUGGAGUGAAAAGCUAAGAAUAUUGAAUCUCGACCAGCCGAGUAGAAAUAUCUCAGUAGUUGGUCUCAGGUCUUAAUAAUAAUUUUUUUUUGCUAAGUCUUAUAAUUUCUGUUCGACUGGUAGAGAUUCAAUCUUUUCUGCAGAUCACUCUUAUCGUACCAGGAGAAUGCCUUUAUG	-57.4	42	31	66	66	205	73	35.6098	-28	-0.786301	.....(((((......(((....((((((.(((((((...((..((((.((((((((((.(((((.(((((((((((...((((...))))....(((.((((.(((.((....)).))).)))).)))...))))))))))).))))).)))))))))).))))..))...))))))))))))).)))........)))))...	UCUCGACCAGCCGAGUAGAAA	UCUGUUCGACUGGUAGAGAUU	1609	878	208	0	473	245	97	0	892	389	176	0	258	77	79	0	116	71	14	3	110	38	32	2	647	325	107	10	466	169	121
miRNA-1436	002321F	259202	259528	-	AUUCUUAGUAUUUCUCGACUCGUGAACAUUUUUCAGCGCGAUUUUUUUUUAUGACCGUGUAUAUUGUAGCUAUUUAGAGCAUCCUACAAAUUUUUAGAAAAUUCUGAAUUAUUUACAGUAGCGAAAACUAAGUUCAAACAUGUUGCUUUCCACGCGCAUAAAACAAAUUAGUCACAGGUGCAACAACAUGUUUGAAUUUAGUUUCGGUACUGUAAACUAUUCAGAAUUUUUUGAAAAUUUACAAGAUGCUCUAAAUAGCUACAAUAUACACAGUCAUAAAAAAAAUCACGUCAAAAACUGUUCACGAUUCGAGAGCACUAAGAGCC	-164.4	48	57	113	108	326	105	32.2086	-50.4294	-1.56571	.((((((((..(((((((.(((((((((.((((..(((.((((((((((.(((((.(((((((((((((((((((((((((((....((((((((((((((((((((((..(((((((((.(((((.((((((((((((((((((.((.....((((.....((......)).....))))))))))))))))))))))))))))).)))))))))..))))))))))))))))))))))....))))))))))))))))))))))))))).))))))))))))))).)))..)))).))))))))).))))))).))))))))..	GUGUAUAUUGUAGCUAUUUAGAGC	UCUAAAUAGCUACAAUAUACACAG	33	0	0	2	8	0	0	0	106	0	0	7	14	0	0	6	19	0	4	14	10	0	0	5	21	0	0	19	75	63	0
miRNA-1460	002368F	160634	160785	-	CUUAUCUUGAGGACGAGCAGCAACACGAGCCAUGUGACAUUUUUCAACUGGUUGAUAGCUAGAAAAAUCAGCCGAAUAUACAAUUUUGUGGGCUGCCGACCAAUUGAAAAAUGCCAAGUGACUCGUAUUACUGCCCGUCAUCGAGAUGAGC	-61.7	34	33	46	38	151	67	44.3709	-40.8609	-0.920896	((.((((.((.(((((((((((((((((((((..((((((((((((((((((.(..(((....((((((.((.......))))))))....)))..).))))))))))))))))))..))))))))))))))))))))).)).)))).)).	AGUGACUCGUAUUACUGCCCGUCA	ACGAGCAGCAACACGAGCCAUGUG	47	14	2	4	37	12	2	4	64	16	0	3	57	23	3	2	28	5	1	0	26	6	1	5	27	6	2	0	28	7	3
miRNA-1474	002391F	97072	97473	-	AAUUCUCCUAUAGGGGUUUCACUCUAAGCCCUACUGGUGGGGCUCUCAGUGUUCUCGACCCAUGAGUAGUUUUCGGAGCGAUUUUUUUUAUGACAAUGUAUAUUGUAGCUAUUUAGAGCAUCUUGCAAAUUUUCAGAAAAUUUGUAAUAGUUUACAGUACCGAAAACUAAGUUCAAACAUAUUGCAUGAGUGACUAAUUUUUUUAUGCGCGUGGAAAGCAACAUGUUUGAACCUAGUUUUCGGUAUUGUAAACUAUUCAGAAUUUUCUGAAAAUUUGUAGGAUGCUCUAAAUAGCUAUAAUAUACACGGUCAUCAAAAAAUCGCAUCAAAAACUAUUUACGGGUCGAUAAACAUUGAGAGCCCCACCAGUAAGGCUUAAAGUGAAGGCCCUAUAGAAGA…	-248.3	76	68	127	130	401	144	35.9102	-61.9202	-1.72431	.(((((.((((((((.(((((((.((((((.((((((((((((((((((((((.(((((((.(((((((((((.(..((((((((((..(((((..(((((((((((((((((((((((((((((((((((((((((((((((..((((((((((((((((((((((((.((((((((((.((((....(((..(((.....)))..))).......)))).)))))))))).))))))))))))))))))))))))..)))))))))))))))))))))))))))))))))))))))))))))))..))))).))))))))))..).))))))))))).)))))))..)))))))))))))))))))))).)))))).))))))).)))))))).)))…	GUAUAUUGUAGCUAUUUAGAGCAU	GCUCUAAAUAGCUAUAAUAUACAC	41	0	0	17	8	0	0	10	23	0	0	11	22	0	0	1	22	0	0	25	13	0	0	5	182	150	0	8	31	0	0
miRNA-1511	002523F	38740	38972	+	AUGGAUUGGAUUUUGUUACAUUUAGAGACAAAUCCCGUUAUGUACUUUGGUCUUGGUUUAUGAAUUUAAGUUUAGAUUUGAUGUACUUUGUGCUUGGUUUUAUGUACUUGAGCUUAAAUUGAUUGACACCAAGCCCAAAACACAUUAAACCUAAAUUUAAGUACAUAAUACUAAGUCCAAAGUACAUAACGAGAUUUGUUUCCAAAGGUACAAAAUCCGAUUCCAAUUACAU	-99.4	37	35	76	84	232	72	31.0345	-42.8448	-1.38056	.(((((((((((((((.((.(((.((((((((((.(((((((((((((((.(((((((((((.((((((((((((.((((((((..((((.(((((((.(((.....................))).))))))).))))..)))))))).)))))))))))).))))).)))))).))))))))))))))).)))))))))).))).))))))))))))).)))).......	AAGUACAUAACGAGAUUUGUUUCC	AGACAAAUCCCGUUAUGUACUUUG	60	16	3	1	29	7	2	2	51	5	6	1	50	8	7	0	57	19	4	12	16	5	0	0	118	19	15	2	94	12	14
miRNA-1516	002530F	234669	235030	-	AUAAGUUCUAUCGGUGGAGCUCUCAGUGUUCUUGACCUUUGAAUAGUUUUCGACGCGAAUUUUUUUUAUUACUGUGUAUAUUGUAGCUAUUUAGAGCAUCAACGCGAUUUUCAGAAAAAUCCGAAUAGUUUACAGUACCGAAAACUUGGUUCAAACAUGUUGUUGCACUCGCGACUAAUUUUUUUUAUGCACGUGGAAAUCAAUAUGUUUGAACCUAGUUUUCGGUACUGUAACUAUUCGAAAUUUUCUGAAAAUUUGCAGGAUGCUCUUAAUAGCUACAAUAUACAUGUUCAUAAAAAAAAUCGCGCCGAAAAUUGCUCAUGGGUCGAAAAACACUGAGAGCCCUACCGUUAGGACUUAA	-196	66	63	109	123	361	129	35.7341	-54.2936	-1.51938	.(((((((((.((((((.((((((((((((.(((((((.(((.(((((((((.(((((.((((((((((.((.((((((((((((((((((.((((((((...(((((((((((((((...(((((((((.(((((((((((((((.(((((((((((((((((((....)))))......(((((((....)))))))..)))))))))))))).))))))))))))))))))))))))...))))))))))).))))..)))))))).))))))))))))))))))))..))))))))))))))).))))))))).))).)))))))..)))))))))))).)))))).))))))))).	GUAUAUUGUAGCUAUUUAGAGCAU	GCUCUUAAUAGCUACAAUAUACAU	59	0	0	22	13	0	0	16	38	0	1	21	20	0	0	16	26	0	0	10	6	0	0	8	60	0	0	18	20	0	0
miRNA-1520	002535F	231024	231420	-	GGGAAUAUACUCAUUUGGUACCCUGUGUUUUUGCAAAGUAUCAUUUUGGUGCCCUCUGUUUUCAAUAAUGCUCAUAUGGUACCCUGUAUUUUAAAAUCGUACAUCUUUGGUACCCUAAACUCAGAUUUGAUAGAUAAAAUUUUGUCAAUAUGAUCAAACUGUCAUCAGUUAUAUGCAAUUAUGUAAUUAAAUUUAAAUUUGUAACUUACAUAAUUGACAGCAGUUUGAUUAAAUUGAAAAAAUUUUAUUUAUCAAAUCUGAGUUUAGGGUACCAAAUAUGUAUGAUUUUAAAAUACAGGGUACCAUAUGAGCAUUAUUGAAAACAGAGGGUACCAAAAUGAUACUUUGCAAAAACAUAGGAUACCAAAUGAGUAUAUUCCCUUUCCAGAAUAUUAG	-259.2	60	56	138	142	396	116	29.2929	-65.4545	-2.23448	((((((((((((((((((((.(((((((((((((((((((((((((((((((((((((((((((((((((((((((((((((((((((((((((((((((((((.((((((((((((((((((((((((((((((((((((((.(((((.((((((((((((...........(((((((((((((.(((((....)))))....))))))))))).)))))))))))))).))))).)))))))))))))))))))))))))))))))))))))).))))))))))))))))))))))))))))))))))))))))))))))))))))))))))))))))))))))))))))))))))).))))))))))))))))))))...............	AAUAAUGCUCAUAUGGUACCCUGU	AGGGUACCAUAUGAGCAUUAUUGA	156	88	0	39	18	0	0	4	61	0	0	10	19	0	0	2	104	48	0	3	2	0	0	0	101	0	0	49	57	0	0
miRNA-1601	002864F	35820	36118	-	UCAGUGUUGUCAGCUUGUGAUCGAUGCGAUUUUUUUAUGACUGUGUAUAUUGUAGCUAUUUAGAGCAUUCUGCAAAUUUUCAGAAAAUUCCAAAUAGUUUACAGUACCAAAAACUAGGUUCAAACAUGUUAUUACACGCGUCGAAGAAAACAACAUGUUUGAACCUAGUUUUCGGUACUGUAAAUCGUUCGGAAUUUUCUAAAAAUUUACUAGAUGUUCUAAACAACUACAAUAUACACGGUCAUAAAAAAAUCAUGUCGAAAACUAUUCAUAAGUCGAGAACACUGAUUUAAAGUGA	-144.3	48	47	105	98	298	95	31.8792	-48.4228	-1.51895	((((((((.((.(((((((((((((..((((((((((((((((((((((((((((...(((((((((((..(.(((((((.((((((((((.((..((((((((((((.(((((((((((((((((((((.....................))))))))))))))))))))).))))))))))))..)).)))))))))).))))))).)..)))))))))))...))))))))))))))))))))))))))))..))))).......)))))))).)).))))))))..........	GUAUAUUGUAGCUAUUUAGAGCAU	GUUCUAAACAACUACAAUAUACAC	34	0	0	4	22	0	0	6	27	0	0	2	206	194	0	4	23	0	1	4	4	0	0	2	47	0	0	4	32	0	0
miRNA-1605	002872F	215715	216129	-	GGGAAUUUUUUUAUAGGAUUUUACUUUAGCCCUACCGGUGGGGCUUUCAGUGUUCUCGACUCGUGAAUAGUUUUCUGCACGAUUUUUUUUAUGACCGUGUAUAUUGUAGCUAUUUAGAGCAUCCUGCAAAUUUUCAGAAAAUUCCGAAUAAUUUACAAUACCGAAAACUAAGUUCAAACAUGUUGUUGCACGUGUGACUAAUUUUUUUUAUGCGCGUGAAAAACAAUAUGUUUGAACCUAGUUUUCGGUACUGUAAACUAUUAAGAACUUUAUGAAAAUUUGCAGAAUGCUCUAAAUAGCUACAGUAUACACGGUCAUUAAAAAAAUCGCACCGAAAACUAUUCACAGGUUGAGAAACACUGAGAGCCUACCGAUAUGGCUUAAAGUGAAGCCCUUAUA…	-226.1	72	71	134	137	414	143	34.5411	-54.6135	-1.58112	((((((((((((..(((..((((((((((((.((.(((((((.(((((((((((((((((..(((((((((((((.(..((((((((((.((((((((((((((((((((((((((((((((.(((((((((((((.(((.(((..((((.((((((.((((((((((((.((((((((((((((((.((((((((..(((......)))))))))))...)))))))))))))))).)))))))))))).)))))).))))..))).))).))))))))))))).)))))))))))))))))))))))))))))))).))))))))))..).)))))))))))))..)))))).)))))))))))))))))).)).))).)))))))))..)))....…	GUGUAUAUUGUAGCUAUUUAGAGC	UCUAAAUAGCUACAGUAUACACGG	40	0	1	57	21	0	0	9	52	0	0	9	11	0	0	8	46	0	1	9	128	120	0	5	47	0	0	15	19	0	0
miRNA-1614	002884F	359105	359503	-	CUAUAGGGGCUUCGCUUUAAGCUCUAUAUCGGUGGGGCUCUCAGUGUUUUCGAUCCGUGAACAGUUUUCAGCGCGAUUUUUUUUAUGGCCGUGUAUAUUGUAGCUAUUUAGAGCAUCCUGCAAAUUUUCAGAAUAUUUCGAAUAAUUUACAGUACAAAAAACUAAGUCCAAACAUGUUGUUGCACACGUGACUAAUUUUUUUUAUGCAUGUGGAAAACAACAUGUUUGAAACUAGUUUUCGGUCCUGUAAACUAUUCAGAAUUUUCUGAAAAUUUGCAGGAUGCUCUAAACAACUACAAUAUAUACGGUCAUAGAAAAAAAUUGUGCCGAAAGUUGUUCAUGGGUCGAGAACACUGAAGAGCCCCAUCAAUAAGGCUUAAAAUGAAAUCCCUAUAUAA	-226.5	74	69	125	130	398	143	35.9296	-56.9095	-1.58392	.(((((((..((((.(((((((.((.(((.(((((((((((((((((((((((((((((((((..((((.(((((((((((((((((((((((((((((((((...(((((((((((((((((((((((((((.(((..(((((.(((((((.((..(((((((..(.(((((((((((((...((((((..(((......)))..))))))...))))))))))))).)..)))))))..)).))))))).)))))..))).)))))))))))))))))))))))))))...))))))))))))))))))).)))))))))))))).))))..)))))))))))))))))))))).))))))))))).)))))))))))).))))..)))))))...	GUAUAUUGUAGCUAUUUAGAGCAU	GCUCUAAACAACUACAAUAUAUAC	43	0	0	20	119	109	0	6	25	0	0	10	12	0	0	5	20	0	0	14	13	0	0	4	34	0	0	12	27	0	0
miRNA-1703	003126F	259365	259758	-	AGGGAAUAUACUCAUUUGGUACCCUGUGUUUUUGCAAAGUAUCAUUUUGGUACCUUCUAUUUUCAAUAAUGCUCAUAUGGUACCCUGUAAUUUAAAAUCGUACAUAUUUGGUAUCCUAAAUUCAGAUUUGAUAGAUAAAAUUUUGUCAAUAUGAUCAAACUGUCAUCAGUUAUAUGUAUUAUGUAAUUAAAUUUAAAUUUGUAACUUACAUAAUUGACAGCAGUUUGAUUAAAUUGACAAAAUUUUAUCUAUCAAAUCUGAGUUUAGGGUACCAAAUAUGUACAAUUUUAAAAUACAGGGUCUCAUAUAAGCAUUAUUGAAAACAGAGGGUACCAAAAUGAUACUUUGCAAAAACAUAGGGUACCAAAUAAGUAUAUUCCCAUAAAAAAAUAA	-237.1	54	52	147	140	393	106	26.972	-60.3308	-2.23679	.(((((((((((.(((((((((((((((((((((((((((((((((((((((((((((.((((((((((((((.(((((..((((((((.((((((((.(((((((((((((((((((((((((((((((((((((((((((((((((((.((((((((((((..((((((((.((..(((((.((((.......)))))))))..)).))))))))..)))))))))))).))))))))))))))))))))))))))))))))))))))))))))))))))).)))))))).))))))))..))))).)))))))))))))).))))))))))))))))))))))))))))))))))))))))))))).)))))))))))............	CAAUAUGAUCAAACUGUCAUCAGU	UGACAGCAGUUUGAUUAAAUUGAC	107	64	0	18	21	0	0	4	70	0	0	17	18	0	1	8	16	0	0	11	7	0	1	13	96	53	0	11	72	0	0
miRNA-1705	003128F	328704	328952	-	AGUUUUUUUUAUGACUGUGUAUAUUGUAGCUAUUUAGGGCAUCCUGCAAAUUUUCAGAAAAUUCCAAAUAGUUUACGGUACCAAAAACUAGGUUCAAACAUGUUGUUGCACGCGUGACUAAUUUAUUUUAUGCGUGUGGAAAGUUACAUAUUUGAACUUAGUUUUCGGUACUGUAAACCAUUCGGAAUUUUCUGAAAAUUUGCAGGAUGCUCUAAAUAGCUACAAUAUACAUGGUCAUAAAAAAAAUC	-150.8	43	36	80	89	248	79	31.8548	-60.8065	-1.90886	.((((((((((((((((((((((((((((((((((((((((((((((((((((((((((((((((.(((.((((((((((((.(((((((((((((((.((((..(..(((((((((..........)))))))))..)......)))).))))))))))))))).)))))))))))).))).)))))))))))))))))))))))))))))))))))))))))))))))))))))))))))))))).	UCUGAAAAUUUGCAGGAUGCUCUA	GGGCAUCCUGCAAAUUUUCAGAAA	43	0	0	15	9	0	0	3	61	0	0	6	15	0	1	4	9	0	0	4	6	0	0	2	24	0	0	18	19	0	0
miRNA-1719	003215F	181731	182097	-	AUCAUUUGAUAUCCUGUGUUUUUGCAAAGUAUCAUUUUGGUGCCCUCUGUUUUCAAUAAUGCUCAUAUGGUACCCUGUAUUUAAAAAUCGUACAUAUUUUGUACCAUAAACUCAAAUUUAAUUAAUAAAAUUUUACCAAUUUAAUCAAAUUGUUGUCAAUUAUAUAAGUUAUGAAUUUAAAUUUAAUUACUUAAUUCAUAUAACUGAUGACAAUUUGAUCAUAUUGACAAAAUUUUAUCUAUCAAAUCUGAGUCUAGGGUAUCAAAUAUGUAUAAUUUUAAAAUACAGGGUACUAUAUGAGCAUUAUUGAAAACAGAAGAUACUAAAAUGAUACUUUGCAAAAACAUAGGGUACUAAAUGAGUAAA	-170.9	44	45	139	138	366	89	24.3169	-46.694	-1.92022	.(((((((.(((((((((((((((((((((((((((((((((.(.(((((((((((((((((((((((((((((((((((((.(((((..(((((((((.(((((.((.(((((.((((.((..((((((((((..((((...((((((((((..(((.((((((.(((((..((((.......))))...))))).)))))).)))..))))))))))...))))..))))))))))..)).)))).))))).)).))))).)))))))))..))))).))))))))))))))))))))))))))))))))))))).).))))))))))))))))))))))))))))))))).))))))).....	AAUAAUGCUCAUAUGGUACCCUGU	AGGGUACUAUAUGAGCAUUAUUGA	124	88	0	15	18	0	0	3	39	0	0	8	13	0	0	14	57	48	0	7	3	0	0	3	35	0	0	21	10	0	4
miRNA-1758	003356F	195658	196008	-	GGUAUCAUGUGUUUUUGCAAAGUAUCAUUUUGGUACCAUCUGUUUUCAAUAAUGCUCAUAUGGUACCCUGUAUUUUAAAAUUGUAUAUAUUUGGUACCCUAAACUCAAAUUUAAUUAACAAAAAUUUAUCAAUUUAAUCAAACUGCUGUCAAUUAUGUAAGUUCCAAAUUUAAAUUUAAUUACUUAAUUACAUAUAACUGAUGACAGUUUGAUCAUAUUGACAAAAUUUUAUGUAUCAAAUUUGAGUCUAGGGUAUCAAAUAUGUAUAAUUUUAAAUUACAUGGUAUCAUAUGAGCAUUAUUGAAAACAGAUGGUACCAAAAUGAUACUUCGCAAAAACAUAGGAUACCA	-180.3	44	46	129	131	350	90	25.7143	-51.5143	-2.00333	((((((.(((((((((((.((((((((((((((((((((((((((((((((((((((((((((((((.((((.((((((((((((((((((((((((((((.((((((((((.((..((((((((((.(((((...(((((((((..((((..(((((((......((((.......))))......)))))))....))))..)))))))))...)))))..))))))).))))).)))))))))).)))))))))))))))))))))))))))).)))).)))))))))))))))))))))))))))))))))))))))))))))))).))))))))))).)))))).	AAUAAUGCUCAUAUGGUACCCUGU	AUGGUAUCAUAUGAGCAUUAUUGA	81	0	0	9	72	40	0	3	13	0	0	6	5	0	0	0	36	0	0	7	66	64	0	2	54	0	1	27	28	0	0
miRNA-1769	003401F	47444	47802	-	GGUACCUUAUAAUUUUGCAAAGUAUCAUUUUGGUGCCCUUUGUUUUCAAUAAUGCUCAUAUGAUACCCUGCAUUUUAAAAUUAUACAUAUUUGAUACCCUAGAUUCAGAUUUGAUAGAUAAAAUUUUGUCAAUAUGAUCAAACUGUCAUCAGUUAUAUGUAAUUAAGUGAUUAAAUUUAAAUUUGGAACUUACAUAAUUGACAGCAAUUUGAUUAAAUUGGUAUAAUUUUAUUAAUUAAAUUUGAGUUUAAGAUAACAAAUAUGUACGAUUUUAAAAUACAAGUACCAUAUAAACAUUAUUGAAAAUAAAGAGUACCAAAAUAAUAUUUUACUAAAAUACAGGGUACCAAAUGAUUAC	-117.9	43	41	140	134	358	84	23.4637	-32.933	-1.40357	((((((((.((.(((.(.(((((((.((((((((((.(((((((((((((((((...(((((.(((..((.((((((((((..((((((((((.((.(.((((((((((((((((.(((((((((.(..((((.((((((((.(((..(((((..((((((....(((..((((((....)))))).))))))))))))))..))).)))))))).))))..).))))))))).)))))))))))))))).).)).))))))))))..)))))))))).)).))).)))))...))))))))))))))))).)))))))))).))))))).).))).)).))))))))..........	CAAUAUGAUCAAACUGUCAUCAGU	UGACAGCAAUUUGAUUAAAUUGGU	84	64	0	4	18	0	0	5	37	0	0	6	5	0	0	1	7	0	0	3	3	0	0	0	77	53	0	4	31	0	0
miRNA-1785	003471F	226397	226511	-	AUUGUAGGGCGUCUCUCUUUUGGCAGGCAAUUUUAAUGGAAAUUAUAUAUAUAUGUAUAUAUAUACAUAUAUAUAUUAAUGUAAUGACCCGCCAAAGGAGAGUUGCCCUCCAAC	-46.4	20	18	37	39	114	38	33.3333	-40.7018	-1.22105	.(((.((((((.((((((((((((.((((....((((....))))(((((((((((((....))))))))))))).........)).)).)))))))))))).)))))).))).	GGGCGUCUCUCUUUUGGCAGG	CGCCAAAGGAGAGUUGCCCUC	2	2	0	0	1	0	0	0	0	0	0	0	4	3	0	1	10	5	0	0	9	4	0	0	20	16	0	0	18	16	0
miRNA-1788	003493F	313551	313826	-	AGUUUUCGGUGUAAUUUUUUUUAUAACCGUGUAUAUUGUAGCUAUUUAGAGCAUUCUUCAAAUUUUUCAGAAAAUUCCGAAUAGUUAAUAAUAUCGAAAACAAGGUUCAAACAUGUUAUUUUUCACGCGUAUAAAAAAAAUUAGUCACAUGUGCAACAACAUGUUUGAACUUAGUUUUCGGUACUGUAAAUUAUUCGGAAUUUUUUAAAAAUUUGCAAGAUGCUCUAAAUAGCUAUAAUAUACAUAGUCAUAAAAAAAUCGAUCGAGAACACUAA	-119.6	38	36	102	99	275	74	26.9091	-43.4909	-1.61622	.(((((((((.....(((((((((.((..(((((((((((((((((((((((((.((((((((((((.((((((((((((((((((.(((.((((((((((.(((((((((((((((.((...((((.((.(((......)))...)).)))).)).))))))))))))))).)))))))))).))).))))))))))))))))))))))))))).))))))))))))))))))))))))))))..)).)))))))))...))))))))).....	GUAUAUUGUAGCUAUUUAGAGCAU	GCUCUAAAUAGCUAUAAUAUACAU	9	0	1	5	4	0	0	8	190	185	0	2	35	0	0	0	3	0	0	3	3	0	0	0	31	0	1	12	7	0	0
miRNA-1797	003563F	2681	3137	-	AAUCUAAGGAUACAUAUAUAGGAGAAUUCUCUUAUAGGGACUUUACUUUAAGUCAUACUGGUGGAACUCUCAGUAUUCUCGACCCGUGAAUACUUUGCGGCAUGAUAUUUUUUUUUUAUGACCAUGUAUAUUGUAGCUAUUUAGAGCAUCUUGCAAAUUUUCAGAAAAUUCCGAAUAGUUUACAGUACCGAAAACUAAGUUCAAAUUUGUUGUUACACACGUGACUAAUUUUUUUUAUGCGAGUGGAAAACAUGUUUGAACCUAGUUUUCGGUAUUGUAAACUAGUCGGAAUUUUCUGAAAAUUUGCAGGAUGCUCUAAAUAGCUACAAUAUAUACGGUCAUAAAAAAAAAUUAUGCCGAAAACUGUUCACAGGUCAAGAAUUUGAGAACCACACCGGU…	-235.3	76	71	156	153	456	147	32.2368	-51.6009	-1.60068	.((((((..(((((((((((.((.(((((((.(((.(((..((...((((((.(.(((.((((.(..(((((..((((((((((((((((.(.(((.((((((.....(((((((((((((((((.((((((((((((((((((((((((.(((((((((((((((((((((((.(((((((((.((((((((((((((((((((..((((.((.(((.((....(((......)))..)).))).))))))..)))))))))))))))))))).))))))))).))))))))))))))))))))))).)))))))))))))))))))))))).)))))))))))))))))..)))))).))).).)))))))))))))))).)))))..).)))).))…	UCUGAAAAUUUGCAGGAUGCUCUA	GAGCAUCUUGCAAAUUUUCAGAAA	42	0	0	19	11	0	0	10	29	0	0	8	25	0	4	3	19	0	0	10	11	0	0	2	16	0	0	12	14	0	0
miRNA-1803	003581F	403388	403679	-	GACUCUUUAAACAGUUUUCGACGCGAUUUUUUUAUGACAGUGUAUAUUGUAGUUAUUUAGAGCAUCCUGAAAAUUUUCAGAAAAUUUCAAAUAGUUUACAGUACCGAAAUUAGGUUCAAACAUGUUGUUUUCCAUGCGCAUGAAAAUUUUUAGUCAUGUGUGCAACAUGUUUAAACCUAGUUUUCGCUACUGUAAACUAUUCAGAAUUUUCAGAAAAUCACGCCGAUACUCUAAAUAACUACAAUAUACACGUUAUAAAAAAAAAUUGCGCCGAAAAUUAUUUAAAAGUCG	-130.1	42	46	102	101	291	88	30.2405	-44.7079	-1.47841	((((.((((((.((((((((.(((((((((((((((((.(((((((((((((((((((((((.(((......((((((.((((((((..((((((((((((((.((((((((((((.(((((((((((.......((((((((..(....)..))))))))))))))))))).))))))).))))).))))))))))))))..)))))))).))))))......))).)))))))))))))))))))))))))))))..))))))))))).)))))))).)))))))))).	GUAUAUUGUAGUUAUUUAGAGCAU	ACUCUAAAUAACUACAAUAUACAC	64	45	0	4	3	0	0	2	21	0	5	3	4	0	2	1	12	0	0	5	2	0	0	2	23	0	0	7	10	0	0
miRNA-1820	003687F	176257	176763	-	UAGCUUUAAUAUUAUAUGAAUGGCAUAGUUGAAAUUAGUGUUAUUUAUCUUAUAUAUUAUAGGGAAUUUACUCAUUUAGUAACUUAUGUUUUUUUAAAAUAUCAUUUUGGUACCUUUUGUUUUUAAUAAUGCUCAUAUGGUACUUUGUAUUUUAAAAUUAUAUAUAUUUGAUACCUUAAAUUCAGAUUUGAUAGAUAAAAUUUUGUCAAUAUGAUCAAACUGUCAUCAGUUAUAUGUAAUUAAGUAAUUAAAUUUAAAUUUGGAACUUACAUAAUUGACAGCAGUUUGAUUAAAUUGGUAAAAUUUUAUUAAUUAAAUUUGAGUUUAUGGUACCAAAUAUGUACGAUUUUAAAAUAUAGAGUACCAUAUGAGCAUUAUUGAAAACAAAAGGUACAAAAA…	-195.2	66	51	189	200	506	117	23.1225	-38.5771	-1.66838	.(((.(((((.((((((...((.((((.(((((.(((.((.(((.((..(((((((.(((((((.....((((.(((.(((.(((.(((((((.((((.(((((((((.(((((((((((((((((((((((((((((((((((((((((((((((((..((((((((((.((((.((((((((((((((((.(((((((((((..((((.((((((((((((..(((((..(((((((((((((......)))))).........))))))))))))..)))))))))))).))))..))))))))))).)))))))))))))))).)))).))))))))))..))))))))))))))))))))))))))))))))))))))))))))))))).))))…	CAAUAUGAUCAAACUGUCAUCAGU	UGACAGCAGUUUGAUUAAAUUGGU	105	64	0	14	17	0	0	6	54	0	0	21	18	0	2	16	11	0	0	19	5	0	0	5	109	53	0	16	27	0	0
miRNA-1836	003727F	206966	207305	-	CGGUAGGACUCUCAGUGUUCUCGACCUUUGAACAGUUUUCAGCACGAUUUUUUUUAUAACCGUGUAUAUUGUAGCUAUUUAGAGCAUCGGCACAAUUUUUAGAAAAUUCUGAAUAGUUUACAGUACCGAAAACUAAGUUCAAACAUGUUGUUGCACGCGUGGCUAAUUUUUUUUAUGCACGUGGAAAGCAACAUGUUUGAAUCUAGUUUUCGGUACUAUAAACUAAUCAUAAUUUUCUGAAAAUUUGCACGAUGCUCUAAACAACUACAAUAUACACGGUCAUAAAAAAAAUUGUGCCAAAAACUGUUCAUGACUCAAGAAACACUAAGAGCCUUACCA	-183.3	55	62	112	110	339	117	34.5133	-54.0708	-1.56667	.((((((.((((.((((((((.((....(((((((((((..((((((((((((((((.((((((((((((((((...(((((((((((((((.(((((((((((((((.(((.(((((((.((((((((((((((..(((((((((((((((...((((((.((((......))).)))))))...)))))))))))))))..)))))))))))))).))))))).))).)))))))))))))))))).))))))))))))...)))))))))))))))).))))))))))))))))..)))))))))))....)).)).)))))).)))).)))))).	GUAUAUUGUAGCUAUUUAGAGCAU	GCUCUAAACAACUACAAUAUACAC	72	0	0	5	15	0	0	12	240	185	1	24	34	0	0	8	39	0	0	6	9	0	0	7	55	0	10	27	36	0	0
miRNA-1837	003727F	272530	272740	+	AGGUAAAAUAAUUUUUUUUUCAGUUACUUUGCACAAUAACCUUGUUUUGAUAAUUUUUUGCAAAAUGACCUUCCAAACUUGACAACAUGUUAACAUUUUCAACAUCAUCUUGAAAAAAUUUCAGCAUUGUCGGAAGGUCAUUUUACAAAAAAUUAUCGAAAGAAGACUUUUUGCAAAGUGACAUUAAAGAAAAAGUCAAUUUUUACCAAU	-70.8	25	31	79	75	210	56	26.6667	-33.7143	-1.26429	.(((((((..((((((((((..(((((((((((.((....(((.((((((((((((((((.(((((((((((((......((((..(((((....(((((((.......)))))))......)))))))))))))))))))))).)))))))))))))))).)))...)).)))))))))))....))))))))))....)))))))...	AUAAUUUUUUGCAAAAUGACCUUC	AGGUCAUUUUACAAAAAAUUAUCG	6	2	2	1	6	6	0	0	8	4	3	0	1	1	0	0	12	8	4	0	0	0	0	0	27	19	8	2	20	12	8
miRNA-1851	003776F	211535	211989	-	UUAUGUAUAUAGGACAAUUCUUCUAUAGGGGCUUCACUUUAAGCCCUACCGGUAGGGCUCUUAGUGUUUCUCGACCCGUGAACAGUUUUCGGCGCAAUUUUUUUUAUGCCUGUGUAUAUUGUAGCUAUUUAGAGCAUCCUACAAAUUUUCUAUAAAUUCCAAAUAGUUUACAAUAUCGAAAACUAGGUUCAAACAUGUUGUUUUCCAUGCGCAUAAAAAAAAUUAGUCACGCGUGCAACAAUAUGCUUGAACCUAGUUUUCGGUACUGUAAACUAUUCGGAAUUUUUUCAAAAUUGGCAGGAUGCUCUAAAUAGCUACAAUAUACAGGGUCAUAAAAAAAAUCGCACCGAAAACUAUUCACGGGUCGAGAACACUGAGAGCCCCACCGGUAGGGCUUAA…	-275.2	80	88	142	144	454	168	37.0044	-60.6167	-1.6381	.((((((((((((..(((((((((((((((.(((.((((((((((((((((((.((((((((((((((.(((((((((((((.(((((((((.((.((((((((((((.((.((((((((((((((((((((((((((((.(.((((((....(((((((.(((((((((((.(((((((((((((((((((.(((((((((...((((((..(((......)))....)))))).))))))))).))))))))))))))))))).))))))))))).)))))))....)))))).).)))))))))))))))))))))))))))).)).)))))))))))).)).))))))))).))))))))))))))))))))))))))).)))))))))))))))…	GUAUAUUGUAGCUAUUUAGAGCAU	GCUCUAAAUAGCUACAAUAUACAG	39	0	0	9	10	0	0	7	62	0	0	11	22	0	0	4	47	0	0	8	36	0	0	5	44	0	0	21	35	0	0
miRNA-1881	003893F	112561	112927	-	AACCAUUUGGUACCCUGUGUUUUUACAAAGUAUCAUUUUUGUACCCUCUGUUUUCAAUAAUGCUCAUAUGGUACCCUGUAUUUUAAAAUCGUACAUAUUUGGUACCCUAAACUCAAAUUUAAUUAAUAAAAUUUUACUAAUUUAAUCAAACUGCUGUCAAUUAUGUAAGUUUCAAAUAUAAAUUUAAUUACUUAAUUACAUAUAACUGAUGACAGUUUGAUCAUAUUGACAAAAUUUUAUCUUUCAAAUCUGAAUCUAGGGUAUCAAAUAUGUAUAAUUUUAAAAUACAUGGUAUCAUAUGAGCAUUAUUGAAAACAGAUGGUACCAAAAUGAUACUUUGCAAAAACAUAGGAUACCAAAUGAGUA	-166.8	42	52	136	136	366	94	25.6831	-45.5738	-1.77447	.(((((((((((.(((((((((((.((((((((((((((.(((((.(((((((((((((((((((((((((((((.(((((((((((((..((((((((((((((((((.(.(((.((((.....((((((((((..((((...(((((((((..((((..(((((((...........................)))))))....))))..)))))))))...))))..)))))))))).....)))).))).).))))))))))))))))))..))))))))))))).))))))))))))))))))))))))))))).))))).)))))))))))))).))))))))))).))))))))).)).	AAUAAUGCUCAUAUGGUACCCUGU	AUGGUAUCAUAUGAGCAUUAUUGA	141	88	0	7	12	0	0	3	47	0	0	8	19	0	0	2	66	48	0	11	7	0	0	2	53	0	1	31	24	0	0
miRNA-1904	004025F	325007	325301	-	AAUCCGUGAAUAGUUUUUGACGUGAUUUUUUUUAUGACCGGUAAUAUUGUAACUAUUUAGAGCAUUCUGCAAAUUUUCAGAAAAUUCCGAAUAGUUUACAGUAUUGAAAACUAGGUUCAAACAUGUUAUUGCACGCGUGACUAAUUUUUUUAUGCGCGUGGAAAACAACAUGUUGAACCUAGUUUUCGGUACUGUAAACUAUUCGGAAUUUUCUGAAAAUUUGCAGGAUGCUCUAAAUAGCUACAAUAUAUACGGUCAUAAAAAAAAGUCGCGCCGAAAACUGUUCACGGGUCG	-188.2	55	46	94	99	294	101	34.3537	-64.0136	-1.86337	.((((((((((((((((((.((((((((((((((((((((...((((((((.((((((((((((((((((((((((((((((((((((((((((((((((((((((((((((((((((((.((((((.((.(((((((...............))))))).))...)))))))))))))))))))))))))))))))))))))))))))))))))))))))))))))))))))))))))).))))))))...))))))).))))))))))))).))))))))))))))))))..	AGAAAAUUCCGAAUAGUUUACAGU	UGUAAACUAUUCGGAAUUUUCUGA	118	87	0	4	14	0	0	9	27	0	1	11	4	0	0	8	36	0	0	8	5	0	0	2	28	0	0	10	75	53	0
miRNA-1914	004093F	329827	329926	-	UUAAGUUUGCUUGUGCUUGGACAGGCGGUGGAUCAAAUAUGAAUUCUUGUGAUAAGAGUUCAUAUUUGUUGCGCUGCCUGUUGUUGCUCAAGUGGCUUA	-49.6	27	14	20	38	99	41	41.4141	-50.101	-1.20976	.((((.(..((((.((...(((((((((((.(.((((((((((((((((...)))))))))))))))).).)))))))))))...)).))))..)))))	UCAUAUUUGUUGCGCUGCCUGUUG	ACAGGCGGUGGAUCAAAUAUGAAU	8	1	1	4	3	0	0	2	4	2	1	4	1	0	0	1	16	12	0	3	1	0	0	2	10	4	4	4	4	1	0
miRNA-1915	004107F	352897	353085	+	CAAAUGCUAUAGACAUUAUCGAUUAAAUUUGUGCUGCUUGACCGUGACAGCAGAUGGUUUAUCACUCUCUCAUAUAUAAUUAAUAUAUAUAUAUAUAUAUUGUGUAUAUAUAUUAUUUGUUUGGAUGAAUGGUAAGCCAUCUCUUGUCAUGGAAGCAUAAAUUUAUAUCGAUAUUGUCUCUGGUAUUU	-81.2	30	24	57	77	188	54	28.7234	-43.1915	-1.5037	.((((((((.(((((.(((((((((((((((((((......(((((((((.(((((((((((((.((..(((...((((.(((((((((((((((.....))))))))))))))).)))).)))..)).))))))))))))).))))))))).)))))))))))).))))))).))))).))))))))	UGACAGCAGAUGGUUUAUCAC	GGUAAGCCAUCUCUUGUCAUG	418	404	4	0	151	146	1	1	415	393	10	1	117	112	1	0	157	147	3	3	100	93	6	0	678	650	6	0	251	238	0
miRNA-1954	004290F	202279	202553	-	UUCUGUUUUCAAUAAUGUUCAUAUGGUACCCUUUAUUUUAAAAUCGUACAUAUUUGGUAUCCUAAACUCAGAUAUGAUAGAUAAAAUUUUGUCAAUAUGAUCAAACUGUCAUCAGUUAUAUGUAAUUAUAUAAUUAAAUUUAAAUUUGUAACUUACAUAAUUGACAGCAGUUUGAUUAAAUUGACAAAAUUUUAUCUAUCAAAUCUGAGUUUAGGGUACCAAAUAUGUACGAUUUUAAAAUACAAGGUACCAUAUGAGUAUUAUUGAAAACAGA	-155.2	34	32	103	105	274	66	24.0876	-56.6423	-2.35152	.(((((((((((((((((((((((((((((...((((((((((((((((((((((((((((((((((((((((.((((((((((((((((((((((.((((((((((((..(((((..((((((((((((.((((.......))))))))).))))))))))))..)))))))))))).)))))))))))))))))))))).))))))))))))))))))))))))))))))))))))))))...)))))))))))))))))))))))))))))	UGUCAAUAUGAUCAAACUGUCAUC	CAGCAGUUUGAUUAAAUUGACAAA	75	50	0	18	15	0	0	3	43	0	0	49	8	0	0	5	40	0	0	5	16	0	0	12	53	0	0	32	22	0	0
miRNA-1960	004316F	193690	194084	-	GAAUUCUCCUAUAGGGGCUUCACUUUAAGUCAUACCGGUGGGGCUCUCAGUGUUCUCGACCCGUGAACAUUUUUCGGCGCAAUUUUUUUUUUACUGUGUAUAUUGUAGCUAUUUAGAGCAUCCUGCAAAUUUUCAAUUCCGAAUAGUUUACAGUACCGAAAACUAAGUUCAAACAUGUUGUUGCACGCGUUUUUAUGCGCGUGGAAAACAACAUGUUUGAACCUAGUUUUCUGUACUAUAACUAUUCAUAAUUUUCUGAAAAUUUGCAGGAUACUCUAAAUAGCUACAAUAUACACGGUCAUAAAAAAAUCGCUCAAAAAACUAUUCACGGGUCAAGAAACACUGAGAGCCCCACCGAUAGGGCUUAAAGUGAAGCCCCUAUAGAAGAAUUGUC	-239.5	71	79	120	124	394	150	38.0711	-60.7868	-1.59667	.((((((((((((((((((((((((((((.(.((((((((((((((((((((((((((((((((((((((((((((..(((((((((((...((.(((((((((((((((((((((((((((((((((((((((((...(((((((((.(((((((.(((((((((((((((((((((((((.((((((........))))))...))))))))))))))))))))))))).)))))))))))))))).......))))))))))))))))))))))))))))))))))))))))).))...))))))))))).))))))).))))))))))))))).)))))))))))))))))))))).).))))))))))))))))))))))))))))...	GUAUAUUGUAGCUAUUUAGAGCAU	ACUCUAAAUAGCUACAAUAUACAC	28	0	8	31	10	0	0	11	53	0	0	13	14	0	0	20	17	0	0	7	10	0	0	19	33	0	0	23	67	0	16
miRNA-1976	004383F	32186	32549	-	CACUUUAAGCCAGGGGCUCUCAGUGUUUCUCGACCCGUGAAUAGUUUUCGGCACAAUUUUUUUUUAUGAACGUGUAUAUUGUAGUUAUUUAGAGCAUCUAUCAAUUUUCAGAAAAUUCCGAAUAGUUUACAGUACUGAAACUAGGUACAAGCAUGUUGUUUUUCACGCGCAUAAAAAAAUUAGUUAUUCGUGCAACAACAUGUUUGAACUUAGUUUUCGGUACUCUAAACUAUUCGGAAUUUUCUGAAAAUUUGCAGGAUGCUCUAAAUAGCUACAAUAUAUAUGGUCAUAAAAAAAAUCACACUAAAAACUGUUUGCGGGUUGAGAACACUGAGAGCCAUACCGAUAGAGCUUAAAGUAAAA	-195.4	64	60	120	119	363	124	34.1598	-53.8292	-1.57581	.((((((((((.(((((((((((((((.(((((((((..(((((((((..(......((((((((((((.(((((((((((((((((((((((((((((...(((((((((((((((((((((((((((.((((((((((((((((.(((((((((((((.....((((.((((.........)))).)))).))))))))))))).)))))).)))))))))).)))))))))))))))))))))))))))....))))))))))))))))))))))))))))).)))))))))))).....)..)))))))))..))))))))))))))))))))))...))....).)))))))))....	AGAAAAUUCCGAAUAGUUUACAGU	UCUAAACUAUUCGGAAUUUUCUGA	23	0	0	10	15	0	0	8	12	0	0	13	13	0	0	18	15	0	0	20	8	0	0	5	23	0	1	11	55	0	0
miRNA-1980	004408F	236665	237049	-	AGGGAAUAUACUCAUUUGGUACCCUGUGUUUUUGCAAAGUAUCAUUUUAGUAUCCUCUGUUUUCAAUAAUGCUCAUAUGGUACCCUGUAUUUUAAAAUCGUACAUAUUUGGUACCCUGAACUCAGAUUUGAUAGAUAAAAUUUUGUUAAUAUGAUCAAACUAUCAUCAGUUAUAUGCAAUUAUGGAAUUAAAUUUAAAUUUGUAACUUACAUAAUUGACAGCAGUUUGAUUAAAUUGACAAAAUUUUAUCUAUCAAAUCUGAGUUUAGGGUACUAAAUAUGUACAAUUUUAAAAUACAGGGUACCAUAUGAGUAUUAUUGAAAACAGAUGGUACCAAAAUGAUACUUUGCAAAAACAUAGGGUACCAAAAGAGUAUAUUCCCAC	-242.8	56	53	138	137	384	109	28.3854	-63.2292	-2.22752	.((((((((((((.((((((((((((((((((((((((((((((((((.(((((.(((((((((((((((((((((((((((((((((((((((((((.(((((((((((((((((((((((((((((((((((((((((((((((((((.((((((((((....((((((((.((...(((..((.(((....))).))..)))..)).))))))))....)))))))))).))))))))))))))))))))))))))))))))))))))))))))))))))).))))))))))))))))))))))))))))))))))))))))))).))))).)))))))))))))))))))))))))))))))))).))))))))))))..	AAUAAUGCUCAUAUGGUACCCUGU	AGGGUACCAUAUGAGUAUUAUUGA	144	88	2	14	20	0	2	10	40	0	0	17	13	0	0	3	71	48	0	17	10	0	0	3	57	0	0	19	33	0	0
miRNA-1983	004417F	22057	22441	+	AAUGACGUUUUUAAGAAGAGGAGAGUGAUAGUAUUUAAAGUUGAAACUGAUAAAAAUAUACCAACAGAUGUUUACCACUGUUAUAAGGAUGGUGAGUACCAUACCAAGUGACAUCCAUAUCCAAAAUAUAUUCUUUAAUUUUGAUAACAUUCUUAUAAGGUGUUCCCAAAGCAUAUGUUGAAAGUAGACCAUGUUGACUACCAAGAUUCAAAUAGGUCUCCUUGAUAGCCAACAUGGUCUAUUUUUAACAUACGCUAUGGAAACACCUUAUAAGGAUGUUAUGCUCACCAUCCUUACAGCAGUGGUAAGCAUUUGUACGUAUAUCUUCAUCAAUUUUAACUCUGAAAACUAUCAUUGUCCUCUCUUUAAAAAUUUCAUCAAUAA	-179.9	58	66	134	126	384	124	32.2917	-46.849	-1.45081	.((((.((((((((..((((((.(((((((((.((((.((((((((.((((.((.((((((..(((((((((((((((((((.(((((((((((((((.......................((((((..........)))))).((((((((((((((((((((.(((.(((.(((((((((((((((((((((((.(((.((((...............)))).))).))))))))))))))))))))))).))).))).))))))))))))))))))))))))))))))))))).)))))))))))))))))))..)))))).)).)))).)))))))).)))).))))))))).))))))..)))))))).))))......	UGGUCUAUUUUUAACAUACGC	AUAUGUUGAAAGUAGACCAUG	70	43	19	1	37	16	5	1	61	44	15	2	70	48	0	2	29	14	12	2	80	63	5	0	51	21	6	3	38	16	8
miRNA-1998	004417F	53928	54317	+	AAUGAAGUUUUUAAAGAGAGGAGAGUGAUAGUUUUUAGAGUUGAAACUGAUAAAAAUAUACCAACAGAUGUUUACCACUGUUAUAAGGAUUGUGAGUACCAUACCAAGUGACAUCCAUAUCCAAAAUAUAUUCUUUUAUUUUGAUAUCAUUCUUAUAAGGUGUUCCCAAAGCAUAUGUUGAAAGUAGAUCAUGUUGACUACAAAAAUUCAAAUAGGUCUCCUUGAUAGCCAACAUGGUCUAUUUUUAACAUACGCUUUGGAAACACCUUAUAAGGAUGUUAUGCUCACCAUCCUUACAGCAGUGGUAAGCAUUUGUACGUAUAUAUUCAUCAAUUUUAACUCUGAAAACUAUCAUUGUCCUCUCUUUAAAAGUUUCAUCUGUAAACAAC	-187.3	59	64	133	133	389	123	31.6195	-48.1491	-1.52276	.(((((..((((((((((((((.(((((((((((((((((((((((.((((.((.((((((..(((((((((((((((((((.(((((((.(((((((..................(((((.((((((........)))))))))))(((((((((((((((((.(((((((.(((((((((((((((((((((((.((((((....((.....)).....))).))).))))))))))))))))))))))).))))))).)))))))))))))))))...))))))).))))))).)))))))))))))))))))..)))))).)).)))).))))))))))))))))))))))).))))))))))))))..)))))...........	UGGUCUAUUUUUAACAUACGC	AUAUGUUGAAAGUAGAUCAUG	53	43	0	3	21	16	0	1	49	44	0	2	53	48	0	1	24	14	0	4	68	63	1	0	33	21	0	2	6	0	0
miRNA-1999	004417F	56253	56647	+	AUACUAAUGAAGUUUUUAAAGAGAGGAGAGUGAUAGUUUUUAAAGUUGAAACUGAUAAAAAUAUACCAACAGAUGUUUACCACUGUUAUAAGGAUAGUGAGUACCAUACCAAGUGACAUCCAUAUCCAUAAUAUAUUCUUUUAUUUUGAUAACAUUCUUAUAAGGUGUUCCCAAAGCAUAUGUUGAAAGUAGACCAUGUUGACUACCAAGAUUCAAAUAGGUCUCCUUGAUAGCCAACAUGGUCUAUUUUUAACAUACGCUUUGGAAACACCUUAUAAGGAUGUUAUGCUCAUCCUCCUUACUGCAGUGGUAAGCAUUUGUACGUAUAUCUUCAUCAAUUUUAACUCUGAAAACUAUCAUUGUCCUCUCUUUAAAAGUUUCAUCAGUAAACAAC	-186.8	59	68	133	134	394	127	32.2335	-47.4112	-1.47087	.((((.(((((..((((((((((((((.((((((((((((((.((((((((.((((.((.((((((..((((((((((((((((((..((((((..(((((((.......................((.((((........)))).)).((((((((((((((((((((.(((((((.(((((((((((((((((((((((.(((.((((...............)))).))).))))))))))))))))))))))).))))))).)))))))))))))))))))))))))))..))))))..))))))))))))))))))..)))))).)).)))).)))))))).)))))))))))))).))))))))))))))..))))).))))......	UGGUCUAUUUUUAACAUACGC	AUAUGUUGAAAGUAGACCAUG	89	43	19	6	35	16	5	1	72	44	15	3	87	48	17	2	38	14	12	3	77	63	0	0	55	21	6	3	16	0	0
miRNA-2006	004483F	110877	111251	-	UUUCACUUUAAGCUCUAUUUGUGGGACUCUUAGUGUUUCUCGACCCGUAAAUAGUUUUCAGCGCGAUUUUUUUUAUGAUCGUGUAUAUUGUAGCUAUUUAGAGCAUCCUGCAAAUUUUCAGAAAAUUCCGAAUAGUUUAUAGUACCGAAAACUAGGUUCAAACAUGUUGUUUUCCAUGCGUAUAAAAAAAAUUAGUCACGUGUGCAACAACAUAUUUGAAUCUAGUUUUCGGUACUGUAAACUAUUCAGAAUUUUAUAAAAAUUUGCAGAUACUCUAAAUAGUUACAAUAUACAUGGUCAUAAAAAAAAAUCACGUUGAAAACUGUUCAUGGGUCGAGAACACUGAGAGUCCUAUUGGUAAGGCUUAAAGUGAA	-221	64	57	123	130	374	121	32.3529	-59.0909	-1.82645	.((((((((((((..(((..(((((((((((((((((.((((((((((.((((((((((((((.(((((((((((((((((((((((((((((((((((((((.(((.((((((((((...(((((((.(((((((((((((((((((((((((((((((((.((((((((...(((((((.(((......)))...))))))).)))))))).))))))))))))))))))))))))))))))))).)))))))...))))))))))))).))))))))))))))))))))))))))))).)))))))))).)))))))))))))).)))))))))))))))))))))))))))..)))..))))))))))))	GUGUAUAUUGUAGCUAUUUAGAGC	UCUAAAUAGUUACAAUAUACAUGG	50	0	1	13	23	0	0	7	115	101	2	20	26	0	0	6	24	0	0	8	19	0	0	2	30	0	0	19	35	0	0
miRNA-2007	004483F	246065	246315	-	GCGCAUAUGGUACCCUGUAUUUUAAAAUUAUACAUAUUUGAUACCCUAGACUCAGAUUUGAUAGAUAAAAUUUUGUAAUAUGAUCAAACUGUCAUCAAUUAUAUGUAAUUAAGUAAUUAAAUUUAAAUUUGAAACUUACAUAAUUGACAGCAGUUUGAUUAAAUUGGUAAAAUUUUAUUAAUUAAAUUUGAGUUUAUGGUACCAAAUAUGUACGAUUUUAAAAUAUAGGGUACUGUUGACGCGGUUCUUC	-102.9	36	27	90	97	250	63	25.2	-41.16	-1.63333	(((((.((((((((((((((((((((((..((((((((((.((((.((((((((((((((((.((((((((((((((((.((((((((((((..(((((..(((((((((((((............))))))...))))))))))))..)))))))))))).))).))))))))))))).)))))))))))))))).)))).))))))))))..)))))))))))))))))))))))).)))........	ACCCUAGACUCAGAUUUGAUAGAU	UAAUUAAAUUUGAGUUUAUGGUAC	18	0	3	20	6	0	0	2	35	21	0	12	18	0	0	5	2	0	0	1	1	0	0	0	62	38	0	2	18	0	0
miRNA-2026	004553F	277673	278067	-	UUGGGAAUUUACUCAUUUGGUUCCCUAUAUUUUUGCAAAGUAUUAUUUGGUAUCCUCUGUUUCAAUAAUGCUCAUAUAGUACCCUGUAUUUUAAAAUUAUACAUAUUUGAUACCCUAGAUUCAGAUUUGAUAGAUAAAAUUUUGUCAAUAUGAUCAAACUGUCAUCAGUUAUAUGUAAUUAAGUAAUUAAAUUAAAUUUGAAACUUACAUAAUUGACAGUAGUUUGAUUAAAUUGGUAAAAUUUUAUUAAUUAAAUUUGAGUUUAGGGUACCAAAUAUGUACGAUUUUAAAAUACAGGGUACCAUAUGAGCAUUAUUGAAACAGAGGGUACCAAAAUGAUACUUUGCAAAAACACAGGGUACCAAAUGGUUACCUACCCAUAUUUAUUUCCAUA	-197.2	55	51	140	148	394	106	26.9036	-50.0508	-1.86038	.((((.....((.((((((((.((((.(.((((((((((((((((((((((((((((((((((((((((((((((((.(((((((((((((((((((..((((((((((.(((((((((((((((((((((.(((((((((((..((((.((((((((((((..(((((..(((((((((((((...........))))))...))))))))))))..)))))))))))).))))..))))))))))).))))))))))))))))))))).))))))))))..))))))))))))))))))).))))))))))))))))))))))))))))).))))))))))))))))))).).)))).))))))))))......))))..............	CAAUAUGAUCAAACUGUCAUCAGU	UGACAGUAGUUUGAUUAAAUUGGU	89	64	1	43	18	0	0	8	35	0	0	13	11	0	0	3	25	0	0	12	6	0	0	4	108	53	0	32	59	0	0
miRNA-2096	004889F	18502	18862	-	AUUUGGUACUUUAUGUUUUUGUAAAAUAUCAUUUUGGUACUCUUUGUUUUCAAUAAUAUUCAUAUGGUACUCUGUAAUUUAAAAUUAUACAUAUUUGGUACCCUAAACUCAGAUUUGAUAGAUAAAAUUUUAUCAAUAUGAUCAAACUGUCAUCAGUUAUAUGUAAUUAUGUAAUUAAAUUUAAAUUUGUAACUUACAUAAUUGACAGCAGUUUGAUUAAAUUGACAAAAUUUUAUCUAUCAAAUCUGAGUUUAGGGUACCAAAUAUGUACGAUUUUAAAAUACAGGGUACCAUAUGAGCAUUAUUGAAAACAGAGGGUACCAAAAUGAUACUUUGCAAAAACAUAGGGUACCAAACAAG	-207.9	49	43	134	134	360	92	25.5556	-57.75	-2.25978	.((((((((((((((((((((((((.(((((((((((((((((((((((((((((((.((((((((((((((((((.((((((((..((((((((((((((((((((((((((((((((((((((((((((.(((((.((((((((((((..(((((..((((((((((((.((((.......))))))))).))))))))))))..)))))))))))).))))).))))))))))))))))))))))))))))))))))))))))))))..)))))))).)))))))))))))))))).))))))))))))))))))))))))))))))).))))))))))))))))))))))))....	UUGGUACCCUAAACUCAGAUU	UCUGAGUUUAGGGUACCAAAU	72	54	0	9	38	0	0	3	25	0	0	26	35	0	0	1	11	0	0	10	5	0	0	1	46	0	0	15	78	0	0
miRNA-2104	004921F	59551	59904	-	AAGCCCUACCAGUAGGGCUCUCAGUAUUCUCGACCUUUGAACAGUUUUCGGCGCAAUUUUUUUAUGACCGUGUAUAUUGUAGCUAUUUAGAGCAUCAGCGCGAUUUUCAGAAAAUUCUGAAUAGUUUACAUUAUCGAAAACUUGGUUCAAACAUGUUGUUGUAUAUGUGAUUAAUUUUUUUUAUGCGCAUGGAAAACAUGUUUGAACCUAGUUUUCGGUACUGUAAACUAUUCGGAAUUUUCUGAAAAUUUGCAGGAUGAUCUAAAUAGCUACAAUAUACACAGUCAUAAAAAAAAAUUGCGCUGAAAACUGUUCACGGGUCAAGAAACACUGAGAGCCCUUCCGGUAAGGCU	-214.7	67	61	108	117	353	128	36.2606	-60.8215	-1.67734	.((((.((((.(.((((((((((((.((((.(((((.(((((((((((((((((((((((((((((((.((((((((((((((((((((((.((((.(((.(((((((((((((((((((((((((((((.(((((((((((.((((((((((((((......((((((..(((......)))..))))))...)))))))))))))).))))))))))).))))))))))))))))))))))))))))))))..)))).)))))))))))))))))))))).))))))..))))))))))))))))))))))))).))))).))))..)))))))))))).).)))).))))	GUAUAUUGUAGCUAUUUAGAGCAU	GAUCUAAAUAGCUACAAUAUACAC	153	0	2	28	20	0	0	11	33	0	2	12	23	0	0	23	33	0	0	21	17	0	0	6	45	0	0	30	33	0	4
miRNA-2130	005088F	65866	66294	-	UUAUAGGACAAUUCUUCUAUAGGGACUUCACUUUAAGCCCUACCAGUGAGGCUCUCAGUGUUCUCGUCCUUUGAACAAUUUUCGGCGUGAUUCUUUUUAUGACUGGGUAUAUUGUAGCUAUUUAGAGCAUCAGCGCGAUUUUUAGAAAAUUCUGAAUAGUUUAAAGUACCAAAAACUAGGUUUAAACAUGUUGUUGCAUGCGUGACUAAUUUUUUUUAUGCGCGUGGAAAACAACAUGUUUGAACCUAGUUUUCAGUAUUGUAAACUAUUCAGAAUUUUUUGAAAAUUUGCAUGAUGCUCUAAAUAACUACAAUAUACAUGGUCAUAAAAAAAUCGCGUCAAAAACUGUUCACGAGUCGAGAACAAUGAUGAGCCCCAUCGGUAGGGCUUAAAGUGAAG…	-254.1	79	72	132	145	428	151	35.2804	-59.3692	-1.68278	.(((((((((((((((((((((((.(((((((((((((((((((.(((.((((((((.((((((((..(((((((((.((((.(((((((((.(((((((((((..(((((((((((.(((((((((((((((((.(((((((((((((((((((((((((((.(((((..((((((((((((((((((((((((.((((((((..(((......)))))))))))...))))))))))))))))))))))))..))))).)))))))))))))))))))))))))))))).)))))))))))))).)))))))))))..)))))))))))))))))))).)))).)))))).))).)))))))).))).))))).))).)))))))))))))))))))…	GUAUAUUGUAGCUAUUUAGAGCAU	GCUCUAAAUAACUACAAUAUACAU	36	0	0	14	21	0	0	5	23	0	0	15	16	0	0	11	24	0	0	27	9	0	0	10	181	150	0	12	25	0	0
miRNA-2145	005196F	111996	112407	-	GACAAUUUUUUUAUAGGGACUUCAUUUUAAGCCUUACCGGUGGGGCUCUCAGUGUUCUCGACCCAUGAACAGUUUUUAGUGCAAUUUUUUUAUGACCGUGUAUAUUGUAGCUAUUUAGAGCAUCAUGCAAAUUUUCAGAAAAUUCGGAAUAGUUUACAGUACUAAAAACUAGGUUCAAACAUGUUGCUUUCCACGAGCAUAAAAAAAAUUAGUCACGCAUGCAACAACAUUUUUUAACAUAGUUUUCGGUACUGUAAACUAUUCGGAAUUUUCUGAAAAUUUGCAGAAUGCUCUAAACAACUACAAUAUACACGAUCAUAAAAAAAUCGCGCCGAAAACUGUUCAUGAGUCGAGAACACUGAGAGCCACACCUAUAGGGCUUAAAGUGAAACCCCUAUA…	-237.5	70	76	139	126	411	146	35.5231	-57.7859	-1.62671	((((((((((((((((((..((((((((((((((((..((((.(((((((((((((((((((.(((((((((((((..((((.((((((((((((.((((((((((((((...((((((((((..((((((((((((((((((((.((((((((((((((((..(((((((.(((.(((.(((((((((.....))))..................(....)...))))).))).))).)))))))..)))))))))))))))).))))))))))))))))))))..))))))))))...)))))))))))))).)))))))))))).))))..))))))))))))).))))))))))))))))))).))))..))))))))))))))))..)))))))…	GUAUAUUGUAGCUAUUUAGAGCAU	GCUCUAAACAACUACAAUAUACAC	131	0	0	17	23	0	0	8	17	0	0	11	10	0	0	7	24	0	0	9	9	0	0	9	27	0	0	13	32	0	0
miRNA-2153	005242F	224268	224595	-	AAGGCUCUUAGUGUUUCUCGACCCGUGAACAGAUUUCGGCACGACUUUUUUUAUGACCGUGUAUAUUGUAGCUAUUUAGAGCAUCUUGCAAAUUUUUAGAAAAUUUUGAAUAGUUUACAGUACCAAAAACUAGGUUCAAACAUGUUCACGCGCAUAAAAAAAAAUUAGUCAAGCGUGCAACAACAUGUUUGAACCUAGUUUUCGGUACUGUAAACUAUUCGGAAUUUUCUGAAAAUUUGCAGGAUACUCUAAAUAGCUACAAUAUACACGGUCAUAAAAAAAAAUCGUGCCAAAAACUGUUCACGGGUUGUAAACACUGAGAGCCUA	-218.4	57	58	112	100	327	115	35.1682	-66.789	-1.89913	.(((((((((((((((..((((((((((((((.(((.(((((((.((((((((((((((((((((((((((((((((((((.((((((((((((((((((((((((((((((((((((((((((.((((((((((((((((((((((((((.....................)))))....))))))))))))))))))))).)))))))))))))))))))))))))))))))))))))))))).))))))))))))))))))))))))))))))))))))..))))))).))).)))))))))))))).))))))))))))))).	GUAUAUUGUAGCUAUUUAGAGCAU	ACUCUAAAUAGCUACAAUAUACAC	73	0	0	10	8	0	0	6	68	0	0	8	13	0	0	7	46	0	0	9	16	0	0	5	26	0	0	83	34	0	16
miRNA-2166	005328F	38950	39200	-	AUGGAUUGGAUUUUGUUACAUUUAGAGACAAAUCCCGUUAUGUACUUUGGUCUUGGUUUAUGAAUUUAAGUUUAGAUUUGAUGUACUUUGUGCUUGGUUUUAUGUACUUGAGCUUAAAUUGAUUGACACUAAGCCCAAAACACAUUAAACCUAAAUUUAAGUACAUAAUACUAAGUCCAAAGUACAUAACGAGAUUUGUUUCCAAAGGUACAAAAUCUGAUUCCAAUUACAUAUACUAUUCACAAAUAUU	-94.2	37	36	84	93	250	73	29.2	-37.68	-1.29041	.(((((..((((((((.((.(((.((((((((((.(((((((((((((((.(((((((((((.((((((((((((.((((((((..((((.(((((((.(((.....................))).))))))).))))..)))))))).)))))))))))).))))).)))))).))))))))))))))).)))))))))).))).))))))))))..).)))).........................	AAGUACAUAACGAGAUUUGUUUCC	AGACAAAUCCCGUUAUGUACUUUG	60	16	3	1	30	7	2	0	52	5	6	1	50	8	7	0	60	19	4	0	16	5	0	0	118	19	15	1	95	12	14
miRNA-2177	005408F	11985	12191	-	CCCACUAUAUUUUCCUACCCAUUCUUCUCAUACCUUCACUUUUCUCUCCUACCAAACAUCUUAUUAUUUUGUUUUCUUUUCUCAACAUAGUCUAAGGUUAUGUUUGAUGGAGAGAGGAAAGAAAAGGAAAAUAAAAAAGUUGUUUGGUAGGAAAGAUAAGUGGAGGGAAGAGAAAAAUGAGUGGAAAUAUAUUGAGUGGGACUUAC	-82.9	39	31	68	68	206	70	33.9806	-40.2427	-1.18429	(((((((((((((((.((.((((.(((((...(((((((((.(((.((((((((((((.(((.(((((((.((((((((((((((((((..(...)..)))))).........)))))))))))).).))))))..))).)))))))))))).))).)))))))))...))))).)))).))))))).))))..))))))......	ACUUUUCUCUCCUACCAAACAUCU	UUGUUUGGUAGGAAAGAUAAGUGG	31	15	4	0	28	17	1	2	44	22	3	0	21	12	4	0	26	12	5	0	26	13	6	0	51	18	2	0	32	18	2
miRNA-2195	005502F	156336	156746	-	AUUUUUCUAUAAGGAUUUCAUUUUAAGCCUUAUCGGUAAGACUCUCAGUGUUUACAACCCGUGAAUAGUUUUUGGCGCGAUUUUUUUAUAACCGUGUAUAUUGUAGCUAUUUAGAGCAUCCUGCAAAUUUUCAGAAAAUUCCGAAUAGUUUACAGUACAAAAAAUUAGGUUCAAACAAGUUGUUGUACGCGUGACUAAUUUUUUUUAUGCGCGUGGAAAACAACAUGUUUGAACCUAGUUUUCGGUACUAUAAACUAUUCGAAACUUUCUGAAAUUUUGCAGGAUGCUCUAAAUAACUGCAAUAUACACGGUCAUACAAAAAAGUCACGCCGAAAAAUAUUCACGGGUCAAGAAAUACUGAAAGCCUUACCGGUAGGGCUUAAAGUGAAGCAUCUAUAG…	-227.6	73	70	134	133	410	143	34.878	-55.5122	-1.59161	.((((((((((.(..(((((((((((((((((((((((((.((.(((((((((...(((((((((((.(((((((((.(((((((((((.((((((((((((((((.((((((((((((((((((((.(((((((((.((.(((((((((((.(((((..(((((((((((((((((.((((((...((((((..(((......)))..))))))...)))))).)))))))))))))))))..))))).))))))))))).)).))))))))).)))))))))))))))))))).)))))))))))))))).)))..)))))))).))))))))).)))))))))))....))))))))).)).)))))))))))))))))))))))))..).)))))…	GUAUAUUGUAGCUAUUUAGAGCAU	GCUCUAAAUAACUGCAAUAUACAC	21	0	0	21	22	0	0	10	215	185	0	20	6	0	0	3	10	0	0	17	11	0	1	8	25	0	0	25	19	0	0
miRNA-2216	005665F	217046	217448	-	CCUAUAAGGUUUUCACUUUAAGCCCUACCGGUAGGGCUCUCAGUGUUUACAACCCGUGAACAGUUUUCAGCGCGAUUUUUUUUUAUGACCGUGUAUAUUGUAGCUAUUUAGAGCAUCCUGCAAAUUUCAGAAAAUUCCGAAUAGUUUACAGUACCGAAAACUAGGUUCAAACAUGUUGUUGCACGCGUGACUAAUUUUUUUUAUGCGCGUAGAAAACAACAUGUUUGAACCUAGUUUUCGGUACUGUAAACUAUUCGAAAUUUCUGAACAUUUGCAGGAAGCUCUAAGUAGCUACAAUAUACACGGUCAUAAAAAAAAGUCGCGCCGAAAACUGUUCACGGGUCGAGAAACACUGAGAGCCCUACCGGUAAGGCUUAAGUGAAGCCCUAUAGAAAAAUU…	-283.3	79	80	123	120	402	159	39.5522	-70.4726	-1.78176	.(((((.(((((.(((((.(((((.(((((((((((((((((((((((...(((((((((((((((((.(((((((((((((((((((((((((((((((((((((((((((((.((((((((((((((((((.(((.((((((((((((((((((((((((((((((((((((((((((..(((((((..(((......))))))))))....))))))))))))))))))))))))))))))))))))))))))))).)))))))).)))))))))).))))))))))))))))))))))))))))))))))))))))))))).)))))))))))))))))....))))))))))))))))))))))).))))))))))))))).))))).......…	GUGUAUAUUGUAGCUAUUUAGAGC	UCUAAGUAGCUACAAUAUACACGG	79	0	1	13	24	0	2	17	39	0	0	17	9	0	0	4	22	0	0	18	14	0	2	9	41	0	0	30	53	0	0
miRNA-2226	005756F	26396	26523	+	GUCAGCUGUCCCCUAGAGUUUCCUCGAACACUUCACUGGGAACUUUGAUCAAACUAUAGAUUGUGAAGGGUGCAAUGAUGAUAAGCCCACUGAAGUGUUUGGGGGAACUCUGGUUGCCAUCUGACUU	-52.8	32	27	31	37	127	59	46.4567	-41.5748	-0.894915	(((((.((.(..(((((((((((((((((((((((.((((.....(.((((.(((.............)))....)))).)....)))).)))))))))))))))))))))))..).)).)))))..	GUUUCCUCGAACACUUCACUG	CUGAAGUGUUUGGGGGAACUC	63	8	13	0	25	3	4	3	180	35	20	0	27	5	0	26	86	19	12	1	37	4	2	1	148	36	50	2	65	13	12
miRNA-2236	005790F	46403	46701	-	UUUGGUUUGUUACUGUUAGAGAAAAUAUCUCAUUUGAAAAGUGUGUGGGUAUAUUCAACAAUUUAUAAGAGCAUGAGUUACUCCACUCAUCACCAAUUGGUUUUGAGAUGAAACUUCAUGCUUCUCACCGUGCACCCCAUGAAAAGUGUGUGGGUAUAUUCAACAAUUUAUAAGAGCAUGAGUUACUCCAUCUCAAAACCAAUUGGUGAUGAGUGAAGUAAUUCAUGCUCUUAUAAAUUGUUGAAUAUACCCACACACUUUUUCAUGUGGGAUAUUUUCUCUAACAGUUACAAUCAAC	-176	51	52	93	102	298	103	34.5638	-59.0604	-1.70874	.((((((.((.((((((((((((((((((((((.((((((((((((((((((((((((((((((((((((((((((((((((.(((((((((((((((((((((((((((.((((.(((((((....(((..(((..........)))..))).((((..........)))).)))))))))))....))))))))))))))))))))))))))).)))))))))))))))))))))))))))))))))))))))))).)))))).)))))))))))))))))))))).)))))))).	ACUCCACUCAUCACCAAUUGGUUU	ACCAAUUGGUGAUGAGUGAAGUAA	31	0	0	20	28	0	0	16	28	0	0	18	24	0	0	4	45	0	0	18	13	5	0	5	75	33	0	12	29	0	0
miRNA-2299	006266F	170408	170666	-	GUACGAACUUUUUUUAUGACCGUGUAUAUUGUAGCUAUUUAGAGCAUCAUGCAAAUUUUUAGAAAAUUCCAAAUAGUUUACACUACCGAAAAUUAGAUUCAAACAUGUUAUUUUCCAUGCGCAUAACAAAAAUUAGUCACGAGUGCAACAUGUUUGAAUUUAGUUUUCGGUACUGUAAAUUAUUCAGAAUUUUCUGAAAAUUUGCAGGAUGCUCUAAAUAGCUACAAUAUACACGGUCAUAAAAAGAAUCUCGUCGAU	-140.4	39	40	90	89	258	79	30.6202	-54.4186	-1.77722	(.((((..((((((((((((((((((((((((((((((((((((((((.((((((((((((((((((((..(((((((((((.(((((((((((((((((((((((((.........(((((....................)))))))))))))))))))))))))))))).)))))))))))..)))))))))))))))))))).))))))))))))))))))))))))))))))))))))))))...)))))...	GUAUAUUGUAGCUAUUUAGAGCAU	GCUCUAAAUAGCUACAAUAUACAC	31	0	0	9	10	0	0	11	62	0	0	7	10	0	0	14	26	0	0	6	10	0	0	1	27	0	0	10	11	0	0
miRNA-2317	006382F	141233	141652	-	AAGGACAAUUCUUCUAUAGGGCUUCACUUUAAGCCCUACCGAUAGGGCUCUCAGUGUUUCUCAACUUGUGAACAGUUUUUGGCACGACUUUUUUUAUAACCGUGUAUAUUGUAGCUAUUUAGAGCAUCCUGCAAAUUUUCAGAAAUUUCGAUUACUUUACAGUACCGAAAACUAAGUUCAAACAUGUUGUUUUUUACGCGCAUAAAAAAAAUUAGUCAAACAUGCAACAUGUUUGAACCUAGUUUUCGGUAUUGUAAACUAUUCGAAAUUUUCUGAAAUUUGCAGGAUGUUCUAAAUAGCUACAAUAUACACGGUCAUAAAAAAAAUGGCGCUAAAAACUGUUCGCGGGUUGUAAACACUGAGAGCCCUACCGGUAGGGCUUAAAGUGAAGCCCCUAUA…	-265	73	76	136	134	419	149	35.5609	-63.2458	-1.77852	.((((..((((((((((((((((((((((((((((((((((.(((((((((((((((((..((((((((((((((((((((((.(.(.(((((((((.((((((((((((((((((((((((((((((((((((((((.((((((((((((.((.(((((((((((((((((((.(((((((((((((((.......((...............)).......))))))))))))))).))))))))))))))))))).)).)))))).)))))))))))))))))))))))))))))))))))))))))))))).))))))))).).).)))))))))))))))))))))).))))))))))))))))).)))))))))))))))))))).)))))))…	GUAUAUUGUAGCUAUUUAGAGCAU	GUUCUAAAUAGCUACAAUAUACAC	49	0	0	8	22	0	0	9	201	185	0	5	18	0	0	1	16	0	0	9	8	0	0	4	20	0	0	32	20	0	0
miRNA-2328	006484F	126109	126471	-	CAUUUGGUACCCUGUGUUUUUGCAAAGUAUUAUUUUAGUACCCUCUGUUUUCAAUAAUGCUCAUAUGGUACCCUGUAUUUUAAAAUCGUACAUAUUUGGUACCCUAACUCAAAUUUAAUUAAUAAAAUUUUACCAAUUUAAUCAAACUGCUAUCAAUUAUGUAAGUUCCAAAUUUAAAUUUAAUUACUUAAUUACAUAUAACUGAUGAUAGCUUGAUCAUAUUGACAAAAUUUUAUCUAUCAAAUCUGAGUCUAGGGUAUCAAAUAUGUAUAUUUUUAAAAUACAGGGUACCAUAUAAGCAUUAUUGAAAACAAAUGGUACCAAAAUGAUACUUUGAAAAAACAUAGGGUACCAAAUCAGUA	-167.7	42	53	134	133	362	95	26.2431	-46.326	-1.76526	.((((((((((((((((((((.((((((((((((((.(((((...((((((((((((((((.(((((((((((((((((((((((..((((((((((((((((((((((((.((((.((..((((((((((..((((...(((((.(((.(((((..(((((((......((((.......))))......)))))))....))))).))).)))))...))))..))))))))))..)).)))).))))).)))))))))))))))))))..))))))))))))))))))))))).))))))))))))))))...))))).)))))))))))))).)))))))))))))))))))).....	AAUAAUGCUCAUAUGGUACCCUGU	AGGGUACCAUAUAAGCAUUAUUGA	45	0	0	24	32	0	1	8	40	0	1	19	9	0	0	4	26	0	0	8	28	0	0	7	63	0	1	14	90	66	0
miRNA-2333	006499F	61111	61470	-	AUACCGGUAGAGCUCUCAAUGUUUUCAACCUGUGAACAAUUUUCGGUGUAAUUUUUUUUAUGACAAUGUAUAUUGUAGCUAUUUAGAGCAUCUUACAAAUUUUCAGAAAAUUCCGAAUAGUUUACAGUACCGAAAACUAAAUUCAAACAUGUUGUUUCACACGUGACUAAUUUUUUUUAUGCGAGUGGAAAACAACAAGUUUGAACUUGGUUUUCGGUACUGUAAACUAUUCGGAAUUUUCUGAAAAUUUGCAGGAUACUCUAAACAACUACAAUAUACACGGUCAUAAAAAAUAUCGCACUAAAAAUUAUUCACGAGUCUAGAACACUGAAGAGCCCCACCAGUAGAACUUAAAGUUA	-171.2	55	61	126	117	359	116	32.312	-47.688	-1.47586	.(((.(((.(.(((((((.((((((..((.((((((.((((((..(((..((.(((((((((((..((((((((((((...(((((((.(((((.(((((((((((((((((((((((((((((((((((((((((((((.(((((((.((((((((..(((.((..(((......)))..)).)))..)))))))).))))))).))))))))))))))))))))))))))))))))))))))))))))).))))).)))))))...))))))))))))..))))))))))).))..)))..)))))).)))))).))..)))))).)).))))).).))).))).............	GUAUAUUGUAGCUAUUUAGAGCAU	ACUCUAAACAACUACAAUAUACAC	30	0	0	18	13	0	0	9	16	0	1	6	8	0	0	3	8	0	0	9	7	0	0	3	179	150	1	22	19	0	0
miRNA-2350	006637F	90375	90831	-	CUCCUUUUAUAUAUGUUUUUUCUAUAAAGGCUUCACUUUAAGUCUUAUUGGUGGGGCUCUCAGUGUUUCUCAACCCAUGAAUAGUUUUUGACGCGAUUUUUUUUAUGAUCGUGUAUAUUGUAGCUAUUUAGAGCAACCUGCAAAUUUUCAGAAAAUUCCAAAUAGUUUACAGUUCCGAAAACUAGGUUCAAACAUGUUGUUUUUCACGCGCAUAAAAAAAAUUAGUCACGCGUGCAACAACAUGUUUGAACUUAGUUUUCGAUACUGUAAACUAUUCAGAAUUUUCUUAAAAUUUGCAGGAUGCUCUAAAUAACUACAAUAUACGCGGUCAUAAAAAAUAUUGUGCCAAAAACUAUCUAUGAGUCGAGAACACUAAGAGUCCCACCGGUAGAGUUUAAA…	-242	74	78	148	156	456	152	33.3333	-53.0702	-1.59211	.((((..(((((((((((((((((((..((((((((((((((..((((((((((((((((.((((((.(((.((.((((.((((((((((.((((((.(((((((((((((((((((((((((.(((((((((((.((((((((((((.(((((((((..(((((((((((((..((((((((((((((((((((((((((...((((((..(((......)))....)))))).))))))))))))))))))))))))))..)))))))))))))..))))))))).)))))))))))).))))))))))).))))))))))))))))))))))))).)))))).)))))))))).)))).)).))))))))).))))))))))))))))..))))))…	GUGUAUAUUGUAGCUAUUUAGAGC	UCUAAAUAACUACAAUAUACGCGG	17	0	0	19	18	0	0	17	125	101	0	29	12	0	0	17	21	0	0	18	22	0	0	11	34	0	0	25	36	0	1
miRNA-2351	006639F	99239	99454	-	CGUGUAUAUUGUAGCUAUUUAGAGCAUCGGAGCGAUUUUUAGAAAAUUCUGAAUAGUUUACAGUACCAAAAACUAGGUUCAAACAUGUUGUUGCACGCGUUGCUAAUUUUUUUUAUGCGCAUGGAAAACAUGUUUGAACCUAGUUUUCGAUACUGUAAACUAUUCAGAAUUUUCUGAAAAUUUGCGGGAUGCUCUAAAUAACUACAAUAUACACA	-120.9	38	33	69	75	215	71	33.0233	-56.2326	-1.70282	.(((((((((((((.(((((((((((((...((((((((((((((((((((((((((((((((((.(.(((((((((((((((((((((.((.((.((((...(((......))).)))).)).))))))))))))))))))))))).).)))))))))))))))))))))))))))))).))))..))))))))))))).))))))))))))).	GUAUAUUGUAGCUAUUUAGAGCAU	GCUCUAAAUAACUACAAUAUACAC	24	0	10	8	15	0	0	18	198	185	0	20	15	0	0	8	9	0	0	11	5	0	0	3	17	0	0	12	6	0	0
miRNA-2371	006846F	21548	21957	-	UGAUGAUAUGUUUUUAAAUGGGUAAGUAACCAUUUGGUACCUUGUGUUUUUGCAAAGUAUCAUUUUGAUAUCCUCUGUUUUCAAUAAUGCUCAUAUGGUACCCUGUAUUUUAAAAUCGUACAUAUUUGGUACCCUAAACUCAAAUUUAAUUAAUAAAAUUUUACCAAUUUAAUCAAACUGCUGUCAAUUAUGUAAGUUCCAAAUUUAAAUUUAAUUACAUAUAACUGAUGAUAGUUUGAUCAUAUUGACAAAAUUUUAUCUAUCAAAUCUGAGUCUAGGGUACCAAAUAUGUAUAAUUUUAAAAUACAUGGUACCAUAUGAACAUUAUUGAAAAUAGAGGGUAUCAAAAUAAUACUUUGCAAAAAUAUAAGGUACCAAAUGAGUAAAUUCCCUUUUUAA…	-194.5	50	54	149	156	409	104	25.4279	-47.555	-1.87019	.(((((((....((((((.(((....((..((((((((((((((((((((((((((((((.((((((((((((((((((((((((((((.((((((((((((.(((((((((((((..((((((((((((((((((.(((((.((((.((..((((((((((..((((...(((((((((..((((..(((((((...................)))))))....))))..)))))))))...))))..))))))))))..)).)))).))))).))))))))))))))))))..))))))))))))).)))))))))))).)))))))))))))))))))))))))))).))))))))))))))))))))))))))))))..))....)))..)))))…	AAUAAUGCUCAUAUGGUACCCUGU	AUGGUACCAUAUGAACAUUAUUGA	140	88	0	14	13	0	1	8	44	0	0	10	20	0	1	1	76	48	0	13	4	0	0	2	22	0	0	25	16	0	0
miRNA-2376	006872F	28388	28568	-	UUUUCCUACCCAUUCUUCUCAUACCUUCACUUUUCUCUCCUACCAAACAUCUUAUUAUUUUGUUUCUUUUCUCAACAUAGUAAGGUUAUGUUUGGUAGAGAGAGGAAAGAAAAGGAAAAUAAAAAAGUUGUUUGGUAGGAAAGAUAAGUGGAGGGAAGAGAAAAAUGAGUGGAAAUAUAU	-70.8	34	24	62	60	180	58	32.2222	-39.3333	-1.22069	.(((((.((.((((.(((((...(((((((((.(((.((((((((((((.(((.(((((((.((((((((((((((((((.....))))))).........)))))))))))...)))))))..))).)))))))))))).))).)))))))))...))))).)))).))))))).....	ACUUUUCUCUCCUACCAAACAUCU	UUGUUUGGUAGGAAAGAUAAGUGG	31	15	4	0	28	17	1	1	44	22	3	0	32	12	4	0	26	12	5	0	26	13	6	0	51	18	2	0	31	18	2
miRNA-2390	006990F	3370	3772	-	UUGAUAGGAAUUCAAUUUAAACUCUGUUGGUGGGUCUCUCAGUAUUUCUCGACCCAUAAACAGUUUUCGGCACGAUUUUUUUUUCUAACUGUGUGUAUUGUAGCUAUUUAGAGCAUCUGCCAAUUUUUAGAAAAUUCCAAAUAGUUUAUGGUACCAAAAACUAGGUUGAAACAUGUUGUUUUCCACACGCAUAAAAAAAAAUUAGUCACGCGUGCAACAUGUUUGAACUUAGUUUUCGGGUUUGUAAACUAUUUAGAAUUUUCUGAAAAUUUGCAGAAUGCUCUAAAUAGCUACAAUAUACACGGUCAUAAAAAAAAAUCAUACCGAAAACUUUUCAUGAGUCGAGAACACUGAAAAUCCUACUGAUAAGGCUUAAAGUAAAGUCCUAUUACAAAAUUU…	-181.6	63	68	136	135	402	131	32.5871	-45.1741	-1.38626	.((((((((......(((((.(..(((..(((((....(((((..((((((((.(((.((.(((((((((...(((((((((((.(.(((((((((((((((((((((((((((((((((.((((((((((((((((.((((((((((..(..((.(((((((((((.((((((((((.......(((((...................))))))))))))))).))))))))))).))..)..)))))))))).)))))))))))))))).)))).))))))))))))))))))))))))))))).).)))))))))))...))))))))).)).))).)))))))).)))))....)))))..)))..).)))))......))))))))........…	GCUCUAAAUAGCUACAAUAUACAC	GUGUAUUGUAGCUAUUUAGAGCAU	16	0	0	5	15	0	0	1	53	0	0	8	7	0	0	2	19	0	0	3	13	0	0	5	16	0	1	6	13	0	2
miRNA-2424	007353F	8110	8444	-	AUAGGAGCUUUCAGUGUUUCUAGACCUGUGAACAAUUUUUGGCACGAUUUUUUUUAUGAUCGUGUAUAUUGUAGCUAUUUAGAGCAUCCUGUAAAUUUUCAGAAAAUUCCGAAUAGUUUACAGUACUAAAAACUAGGUUCAAACAUAUUGCUUUCCACUCGCAUAAAAAAAACUAGUCACACGUGAAACAACAUGUUUGAACUUAGUUUUCGGUACUGUAAACUAUUCGGAAUUUUCUGAAAAUUUGCAGAAUGCUCUAAAUAGUUACAAUAUACACGGUCGUAAAAAAAUCGCGUCGAAAACUGUUCACGAGUCAAGAACACUGAGAGCCCUA	-195.8	56	58	113	107	334	114	34.1317	-58.6228	-1.71754	.((((.((((((((((((.((.(((.((((((((.((((((((.((((((((((.((((((((((((((((((((((((((((((((.((((((((((((((((((((((((((((((((((((((..((((((((((((((((((.(((.((((.((........................))))))))).))))))))))))))))))..)))))))))))))))))))))))))))))))))))))).)))))))))))))))))))))))))))))))))))))))))).)))))))).)))))))).))).))))))))))))))))))	GUGUAUAUUGUAGCUAUUUAGAGC	UCUAAAUAGUUACAAUAUACACGG	26	0	0	13	12	0	0	10	137	101	0	10	11	0	0	5	31	0	0	15	12	0	0	5	47	0	0	27	56	0	0
miRNA-2452	007716F	141475	141660	+	UUUUAAAGCUUAAAGUUAACAAUAAAGACUUUGGCUUGAUGGUUAAACUAAUUUAUAUGCAUCUUAAUGACAUGGUUUCAAAUCCCAGUAAGUGUAAUUUAAAAAAAAAACCUUACAAUUUAAAGGUAUUUGAAUUAGCUUAAUCAUCAAAGCCAACAUCUUUAUUUUUAAUGGUGCUUUAAAUA	-50.3	23	23	71	68	185	46	24.8649	-27.1892	-1.09348	.((((((((.....(((((.((((((((..((((((((((((((((.((((((((..((((.((((......(((.........))).)))))))).............(((((........)))))...)))))))).))))))))).)))))))..)))))))).)))))...))))))))..	AAUAAAGACUUUGGCUUGAUGGU	CAUCAAAGCCAACAUCUUUAUUUU	274	240	15	2	99	74	11	1	224	196	10	1	52	46	4	0	38	16	9	2	8	8	0	0	121	85	15	9	119	92	11
miRNA-2474	007920F	124838	124971	+	GUCAGCUGUCCACUAGAGUUUCCUCGAACACUUCACUGGGAACUUUUAUCAAACCAUAGAUUGUGAAGGGUGCAAUGAUGAUAAGCCCACUGAAGUGUUUGGGGGAACUCUGGUUGCCAUCUGACUUUGAUUA	-57.8	32	27	34	40	133	59	44.3609	-43.4586	-0.979661	(((((.((.(.((((((((((((((((((((((((.((((.....((((((.(((.............)))....))))))....)))).)))))))))))))))))))))))).).)).)))))........	GUUUCCUCGAACACUUCACUG	CUGAAGUGUUUGGGGGAACUC	63	8	13	0	25	3	4	3	180	35	20	0	27	5	0	26	86	19	12	0	37	4	2	1	148	36	50	2	65	13	12
miRNA-2481	008035F	61991	62355	-	CUUAUUUGGUACUCUAUGUUUUUGCAAAGUAUCAUUUUGGUACCUUUUAUUUUCAAUAAUGCUCAUAUGGUACCCUGUAUUUUAAAAUUAUACAUAUUUGAUACCCUAGACUGAGAUAUGAUAGAUAAAAUUUUGUCAAUAUGAUCAAACUGUCAUCAGUAAUAUAUAAUUAAGUAAUUAAAUUUAAAUUUGAAACUUACAUAAUUGAGAGCAGUUUGAUUAAAUUGGUAAAAUUUUAUUAAUUAAAUUUGAGUUUAGGGUACCAAAUAUGUACGAUUUUAAAAUACAGGGUACCAUAUGAACAUUAUUGAAAAUAGAGGGUAUCAAAAUGAUACUUUGCAAAAACACAAGUACCAAAUGGUUA	-188.8	51	40	137	136	364	91	25	-51.8681	-2.07473	.((((((((((((...(((((((((((((((((((((((((((((((((((((((((((((.((((((((((((((((((((((((((..((((((((((.(((((((((((.((((.((((.(((((((((((..((((.((((((((((((..(((((....(((...(((((..((((((....)))))).))))).))))))))..)))))))))))).))))..))))))))))).)))).)))).))))))))))).))))))))))..)))))))))))))))))))))))))).)))))))))))))))))))))))))))))))))))))))))))))..))))))))))))...	UGUCAAUAUGAUCAAACUGUCAUC	GAGCAGUUUGAUUAAAUUGGUAAA	73	50	0	17	11	0	0	4	81	0	1	10	10	0	0	12	9	0	0	27	7	0	0	9	35	0	0	9	14	0	0
miRNA-2504	008434F	13317	13444	-	AUAGGUCGUCACUAUAGACAUACAUAUUUCUCUCUUCUUUCGAUAGGUCGUCACAACAUGUCGUCGCUAUAGGGUUCCUCGACGAAAAAGAAGAGGGAAAUAUAUAUGUCUAUAGUGACGGCCUAAU	-64.1	26	25	38	38	127	51	40.1575	-50.4724	-1.25686	.(((((((((((((((((((((.(((((((((((((((((.(((.....)))........((((((....(((...))))))))).))))))))))))))))).)))))))))))))))))))))..	GAAAUAUAUAUGUCUAUAGUGACG	UCACUAUAGACAUACAUAUUUCUC	19	10	0	0	38	15	0	0	49	28	0	1	42	32	1	0	21	10	0	0	13	12	0	0	18	10	0	1	12	5	0
miRNA-2524	008819F	103860	104236	-	UAAUAUACUCAUUUGGUACUAUGUGUUUUUGCAAAGUAUCAUUUUGGUACCAUCUGUUUUCAAUAAUGCUCAUAUGGUACCCUGUAUUUUAAAAUUGUACAUAUUUGGUACCCUAAACUCAGAUUUGAUAGAUAAAAUUUUGUCAAUUUAAUCAAACUGCUGUCAAUUAUAUAAGUUACAAAUUUAAAUUUAAUUACAUAAUUACAUAUAAUUGAUGAUAGUUUGAUCAUAUUGACAAAAUUUUAUCUAUCAAAUCUAAGUUUAGGAUACCAAAUAUGUAUGAUUUUAAAAUACAGGGUACCAUAUGAGUAUUAUUGAAAACAGAGAGUACCAAAAUAAUACUUUGCAAAAACACAAGGUACCAAAUAAGUAUAUU	-217.8	46	47	143	140	376	93	24.734	-57.9255	-2.34194	.((((((((.((((((((((.((((((((((((((((((.((((((((((..(((((((((((((((((((((((((((((((((((((((((((..(((((((((((((.((((((((.(((((((((((((((((((((((((((...(((((((((..(((((((((((.(((((..((((.......))))...)))))..)))))))))))..)))))))))...))))))))))))))))))))))))))).)))))))).)))))))))))))..)))))))))))))))))))))))))))))))))))))))))))..)))))))))).)))))))))))))))))).)))))))))).))))))))	AAUAAUGCUCAUAUGGUACCCUGU	AGGGUACCAUAUGAGUAUUAUUGA	96	0	0	17	60	40	0	7	24	0	0	9	8	0	1	11	29	0	0	3	69	64	0	10	36	0	0	12	18	0	3
miRNA-2527	008908F	49048	49450	-	GUUUUUAAAGAGAGGAGAGUGAUAGUUUUUAGAGUUGAAACUAAUAAAAAUAUACCAACAGAUGUUUACCACUGUUAUAAGGAUGGUGAGUACCUUACCAAGUGACAUCUAUAUCCAAAAUAUAUUCUUUUAUUUUGAUAACAUUCUUGUAAGGUGUUCCCAAAGCAUAUGUUGAAAGUAGACCAUGUUGACUACCAAGAUUCAAAUAGGUCUCCUUGAUAGCCAACAUGGUCUAUUUUUAACAUACGCUUUGGAAACACCUUAUAAGGAUGUUAUGCUCACCAUCCUUACAGGAGUGGUAAGCAUUUGUACGUAUAUGUUCAUCAAUUUUAACUCUGAAAACUAUCAUUGUCCUCUCUUUAAAAGUUUCAUCAAUAAACAACACCUCUCUCACUCCUU…	-189.2	61	74	131	136	402	135	33.5821	-47.0647	-1.40148	.(((((((((((((((.(((((((((((((((((((((((.........((((((..((((((((((((((((.((.(((((((((((((((.......................(((((((........))))))).((((((((((((((((((((.(((((((.(((((((((((((((((((((((.(((.((((...............)))).))).))))))))))))))))))))))).))))))).))))))))))))))))))))))))))))))))))).)).))))))))))))))))..)))))).........))))))))))))))))))))))).))))))))))))))).................................…	UGGUCUAUUUUUAACAUACGC	AUAUGUUGAAAGUAGACCAUG	70	43	0	1	37	16	5	0	33	0	15	0	92	48	17	2	41	14	12	1	72	63	5	1	57	21	6	1	33	16	8
miRNA-2528	008908F	50256	50651	-	AUACUAAUGAAGUUUUUAAAGAGAUGAGAGUGAUAGAUUUUAGAGUUGAAACUGAUAAAAAUAUACCAACAGAUGUUUACCACUGUUAUAAGGAUGGUGAGUACCUUACCAAGUGACAUCCAUAUCGAGAAUAUAUUCUUUUAUUUUGAUAACAUUCUUAUAAGGUGUUCCCAAAGCAUAUGUUGAAAGUAGACCAUGUUGACUACCAAGAUUCAAAUAGGUCUCCUUGAUAGCCAACAUGGUCUAUUUUUAACAUACGCUUUGGAAACACCUUAGAAGGAUGUUAUGCUCACCAUCCUUAUAGCAGUGGUAAGCAUUUGUACGUAUAUCUUCAUCACUUUUAACUCUGAAAACUAUCAUUGUCCUCUCUUUAAAAGUUUCAUCAGUAAAAAACA	-193.9	63	66	134	132	395	129	32.6582	-49.0886	-1.5031	.((((.(((((..(((((((((((.((.((((((((.((((((((((((((.((((.((.((((((..((((((((((((((((((((((((((((((((((..........(((((((((.((((.((((((........)))))))))).........(((((((((.(((((((.(((((((((((((((((((((((.(((.((((...............)))).))).))))))))))))))))))))))).))))))).)))))))))...)))))))))))))))))))))))))))))))))))))))))))..)))))).)).)))).)))))))))))))).)))))))).)).)))))))))))..))))).)))).......	UGGUCUAUUUUUAACAUACGC	AUAUGUUGAAAGUAGACCAUG	28	0	0	1	17	0	5	0	78	44	15	0	90	48	17	2	37	14	12	2	72	63	5	1	56	21	6	1	41	16	8
miRNA-2529	008908F	51463	51852	-	AUACUAAUGAAGUUUUUAAAGAGAGGAGAGUGAUAGUUUUUAGAGUUGAAACUAAUAAAAAUAUACCAACAGAUGUUUACCACUGUUAGAAGGAUGGUGAGUACCUUACCAAGUGACAUCUAUAUCCAAAAUAUAUUCUUUUAUUUUGAUAACAUUCUUGUAAGGUGUUCCCAAGCAUAUGUUGAAAGUAGACCAUGUUGACUACCAAGAUUCAAAUAGGUCUCCUUGAUAGCCAACAUGGUCUAUUUUUAACAUACGCUUUGGAAACACCUUAUAAGGAUGUUAUGCUCACCAUCCUUACAGGAGUGGUAAGCAUUUGUACGUAUAUGUUCAUCAAUUUUAACUCUGAAAACUAUCAUUGUCCUCUCUUUAAAAGUUUCAUUAGUAAA	-197.4	64	62	130	133	389	126	32.3907	-50.7455	-1.56667	.((((((((((..((((((((((((((.(((((((((((((((((((((((.........((((((..((((((((((((((((.((..((((((((((((((.......................(((((((........))))))).((((((((((((((((((((((.((((.(((((((((((((((((((((((.(((.((((...............)))).))).))))))))))))))))))))))).)))).)).))))))))))))))))))))))))))))))))))..)).))))))))))))))))..)))))).........))))))))))))))))))))))).))))))))))))))..))))))))))..	UGGUCUAUUUUUAACAUACGC	AUAUGUUGAAAGUAGACCAUG	46	0	19	1	14	0	5	0	73	44	15	1	92	48	17	1	38	14	12	1	71	63	5	1	32	0	6	1	29	16	8
miRNA-2530	008908F	52646	53036	-	AAUGAAGUUUUUAAAGAGAGGAGAGUGAUAGUUUUUAGAGUUGAAACUAAUAAAAAUAUACCAACAGAUGUUUACCACUGUUAUAAGGAUGGUGAGUACCUUACCAAGUGACAUCUAUAUCCAAAAUAUAUUCUUUUAUUUUGAUAACAUUCUUGUAAGGUGUUCCCAAAGCAUAUGUUGAAAGUAGACCAUGUUGACUACCAAGAUUCAAAUAGGUCUCCUUGAUAGCCAACAUGGUCUAUUUUUAACAUACGCUUUGGAAACACCUUAUAAGGAUGUUAUGCUCACCAUCCUUACAGUAGUGGUAAGCAUUUGUACGUAUAUCUUCAUCAAUUUUAACUCUGAAAACUAUCAUUGUCCUCUCUUUAAAAGUUUCAUCAAUAAACAACA	-193.1	60	65	133	132	390	125	32.0513	-49.5128	-1.5448	.(((((..((((((((((((((.(((((((((((((((((((((((.........((((((..(((((((((((((((((((.(((((((((((((((.......................(((((((........))))))).((((((((((((((((((((.(((((((.(((((((((((((((((((((((.(((.((((...............)))).))).))))))))))))))))))))))).))))))).))))))))))))))))))))))))))))))))))).)))))))))))))))))))..)))))).........))))))))))))))))))))))).))))))))))))))..)))))............	UGGUCUAUUUUUAACAUACGC	AUAUGUUGAAAGUAGACCAUG	73	43	0	1	30	16	5	0	33	0	15	2	44	0	17	1	41	14	12	1	81	63	5	1	56	21	6	2	30	16	8
miRNA-2531	008908F	53824	54204	-	AUAAAGAGAGGAGAGUGAUAGAUUUUAGAGUUGAAACUAAUAAAAAUAUACAAACAAAUGUUUACCACUGUUACAAGGAUGGUGAGUACCUUACCAAGUGACAUCUAUAUCCAAAAUAUAUUCUUUUAUUUUGAUAACAUUCUUGUAAGGUGUUUCCAAAGCAUAUGUUGAAAGUAGACCAUGUUGACUACCAAGAUUCAAAUAGGUCUCCUUGAUAGCCAACAUGGUCUAUUUUUAACAUACGCUUGGAAACACCUUAUAAGGAUGUUAUGCUCACCAUCCUUAUAGCAGUGGUAAGCAUUUGUACGUAUAUCUUCAUCAAUUUUAACUCUGAAAACUAUCAUUGUCCUCUCUUUAAAAGUUUCAUCAAUAAACAUCUC	-184.2	57	65	131	127	380	122	32.1053	-48.4737	-1.50984	.(((((((((((.((((((((.((((((((((((((.........((((((..((((((((((((((((((((.((((((((((((((.......................(((((((........))))))).(((((((((((((((((((((((((.((.(((((((((((((((((((((((.(((.((((...............)))).))).))))))))))))))))))))))).))))))))))))))))))))))))))))))))))))))))).))))))))))))))))))))..)))))).........)))))))))))))).)))))))).))))))))))).......................	UGGUCUAUUUUUAACAUACGC	AUAUGUUGAAAGUAGACCAUG	84	43	19	0	32	16	5	0	74	44	15	1	42	0	17	1	30	14	12	2	70	63	5	1	27	0	6	2	26	16	8
miRNA-2537	009153F	77110	77249	+	GUCAGCUGUCCACUAGAGUUUCCUCGAACACUUCACUGGGAACUUUUAUCAAACCAUAGAUUGUGAAGGGUGCAAUGAUGAUAAGCCCACUGAAGUGUUUGGGGGAACUCUGGUUGCCAUCUGACUUUGAUUAACAACA	-57.8	32	29	38	40	139	61	43.8849	-41.5827	-0.947541	(((((.((.(.((((((((((((((((((((((((.((((.....((((((.(((.............)))....))))))....)))).)))))))))))))))))))))))).).)).)))))..............	GUUUCCUCGAACACUUCACUG	CUGAAGUGUUUGGGGGAACUC	63	8	13	0	25	3	4	3	180	35	20	0	26	5	0	26	86	19	12	0	37	4	2	1	148	36	50	2	65	13	12
miRNA-2587	010372F	56860	57262	-	CUAUAGGGGUUUUACUUUACGUCUUACCAGUAGGACUCUUAGUAUUUAUCAACCAGUGAACAGUUUUCGGUACGACUUUUUUUAUGACCGUGUAUAUUGUAGCUAUUUAGAGCAUGCUGUAAAUUUUCAGAAAAUUUCGAAUAGUUUACCGUACCGAAAACUAGGUUCAAACAUGUUUUCCACGCGCAUAAAAAAAUUAGUCACGCGUGCAACAACAUGUUUGAACCUAGUUUUUGGUACUGUAAACUAUUCAGAAUUUUCUGAAAAUUUGCAGGAUGCUCUAAAUAGCUACAAUAUACACGGUCAUAAAAAAAAUCGCGCCGAAAACUGCUCACGGGUUGUAAACACUGAGAGUCCUACCGGUAAGACUUAAAGUGAAACCUCUAUAAAAGAAAUCCC…	-257	70	76	132	124	402	146	36.3184	-63.9303	-1.76027	.((((((((((((((((((.((((((((.((((((((((((((.((((.(((((.((((.((((((((((..(((.(((((((((((((((((((((((((((((((((((((((.((((((((((((((((((((..(((((((((((.(((((((((((((((((((((((((((((.((((((..(((.....)))....)))))).)).))))))))))))))))))))))))))).)))))))))))..)))))))))))))))))))).))))))))))))))))))))))))))))))))))))))).)))..)))))))))).)))).))))))))).)))))))))))))).)))))))).))))))))))))))))))...........…	GUAUAUUGUAGCUAUUUAGAGCAU	GCUCUAAAUAGCUACAAUAUACAC	55	0	0	14	20	0	0	5	29	0	0	20	29	0	0	9	41	0	0	12	22	0	0	2	56	0	0	9	38	0	0
miRNA-2589	010434F	10726	10969	-	UUUUUUUUAUGACCGUAUAUAUUAUAGUUAUUUAGAGCAUCCUGCAAAUUUUCAAAAAAUUCUGAAUAGUUUAUAGUACCGAAAACUAGGCUCAAACAUGUUGUUGCACGUGUGACUAAUUUUUUUUAUGUGCGUGGAAACAACAUGUUUGAACCUAGUUUUCGGUACUGUAAACUAUUCAGAAUUUUCUGAAAAUUUGCAGAAUGCUCUAAAUAGCUACAAUAUACACAGUCAUAAAAAAAG	-139.4	37	35	83	88	243	72	29.6296	-57.3663	-1.93611	.((((((((((((.((.((((((.((((((((((((((((.(((((((((((((.(((((((((((((((((((((((((((((((((((.((((((((((((((.((((..((..(((......)))))..))))..)))))))))))))).))))))))))))))))))))))))))))))))))).))))))))))))).)))))))))))))))).)))))).)).)))))))))))).	GCUCUAAAUAGCUACAAUAUACAC	AUAUAUUAUAGUUAUUUAGAGCAU	27	0	0	14	27	0	0	2	43	0	0	10	8	0	0	2	26	0	0	4	20	0	0	2	44	0	0	11	53	0	3
miRNA-2600	010748F	36253	36490	-	AACCGUGUAUAUUGUAGCUAUUUAGAGCAUCCUGCAAAUUUUCAGAAAAUUUCGAAUAAUUUAUAGUAUCGAAAACUAGAUUCAAACAUGUUAUACGGAUGACUAAUUUUUUUUAUGCGCGUGAAAAACAUGUUUAAACCUAGUUUUCGAUACUGUAAACUAUUCGAAAUUUUCUAAAAAUUUGCAGGAUGCUGUAAAUAGCUACAAUAUACACGGUAGUAAUUAAAACUGUAAUGA	-123.4	36	32	87	82	237	68	28.692	-52.0675	-1.81471	.(((((((((((((((((((((((.(((((((((((((((((.(((((((((((((((.((((((((((((((((((((.((.(((((((((.(((((((((..........)))).).))))...))))))))).)).)))))))))))))))))))).))))))))))))))).))))))))))))))))).)))))))))))))))))))))))....................	GUAUAUUGUAGCUAUUUAGAGCAU	GCUGUAAAUAGCUACAAUAUACAC	198	185	0	12	27	0	0	10	17	0	0	5	3	0	0	5	3	0	0	4	2	0	0	3	11	0	1	7	9	0	0
[truncated: 18 more columns]

## Sheet: Table S3
Table S3: Results of differential expression analysis of miRNAs in roots of the susceptible cultivar Celeia performed by DESeq2.
miRNA ID	baseMean	log2 (inoculated/control)	lfcSE	stat	p-value	p-adj
miRNA-1	23.7958	0.774175	0.93878	0.824661	0.409564	0.667438
hlu-miR169a	79.5544	1.22308	1.01573	1.20414	0.228536	0.617222
miRNA-50	88.0221	-2.1986	0.911364	-2.41242	0.0158469	0.176219
miRNA-63	0	0	0	0	1	NA
hlu-miR171m	457.019	-0.0693748	0.253114	-0.274085	0.784019	0.896022
hlu-miR394c	119.583	0.0998897	0.501467	0.199195	0.84211	0.91289
hlu-miR156a	177.481	-0.441866	0.516028	-0.856282	0.391842	0.656801
hlu-miR482a	21835.2	-0.146242	0.594833	-0.245854	0.805795	0.90903
miRNA-126	0	0	0	0	1	NA
hlu-miR393c	162.138	-0.378583	0.592831	-0.638602	0.523082	0.793642
miRNA-180	0	0	0	0	1	NA
hlu-miR390a	196.059	1.86604	0.782904	2.38349	0.0171494	0.177547
miRNA-190	0	0	0	0	1	NA
miRNA-199	0	0	0	0	1	NA
hlu-miR160a	47.6241	0.979642	0.633039	1.54752	0.121737	0.579075
miRNA-222	0	0	0	0	1	NA
hlu-miR169b	79.5544	1.22308	1.01573	1.20414	0.228536	0.617222
hlu-miR169c	79.5544	1.22308	1.01573	1.20414	0.228536	0.617222
hlu-miR167f	1147.54	-2.09702	0.524513	-3.99804	6.38679e-05	0.00224815
hlu-miR5225	70.8613	0.817989	0.798358	1.02459	0.305557	0.617222
miRNA-283	32.9724	-0.0601139	0.850774	-0.0706578	0.94367	0.949062
hlu-miR159a	19064.9	-0.314344	0.285684	-1.10032	0.271193	0.617222
miRNA-334	0	0	0	0	1	NA
hlu-miR168	151.657	-0.484804	0.387029	-1.25263	0.21034	0.617222
miRNA-363	245.081	-2.61095	0.516717	-5.05295	4.35038e-07	3.82833e-05
hlu-miR156i	34.984	0.372074	0.703526	0.52887	0.596896	0.816848
miRNA-416	106.476	1.11276	0.707027	1.57386	0.11552	0.564765
hlu-miR535a	6023.47	0.841819	0.406604	2.07037	0.038418	0.307344
miRNA-431	25.4359	1.08596	3.73339	0.290877	0.771145	0.888205
hlu-miR319g	179.84	0.592563	0.676109	0.876432	0.380795	0.656801
hlu-miR319h	179.84	0.592563	0.676109	0.876432	0.380795	0.656801
miRNA-492	9.33573	2.07394	3.75581	0.552196	0.580814	0.804907
miRNA-512	25.4359	1.08596	3.73339	0.290877	0.771145	0.888205
miRNA-534	36.8145	-0.440618	0.914508	-0.481809	0.629942	0.816848
hlu-miR164b	693.378	0.77016	0.3558	2.16459	0.0304192	0.267689
hlu-miR164a	693.378	0.77016	0.3558	2.16459	0.0304192	0.267689
miRNA-566	21.3191	-0.108854	0.778262	-0.139868	0.888764	0.936661
miRNA-596	0	0	0	0	1	NA
hlu-miR398a	2518.22	0.496286	0.639719	0.775787	0.437875	0.688089
hlu-miR319a	512.032	0.130012	1.31884	0.0985805	0.921471	0.949062
hlu-miR319b	512.032	0.130012	1.31884	0.0985805	0.921471	0.949062
miRNA-637	0	0	0	0	1	NA
miRNA-640	0	0	0	0	1	NA
miRNA-645	17.9223	-0.0610691	0.72179	-0.0846079	0.932573	0.949062
hlu-miR395b	16.8087	-0.454972	1.15324	-0.394515	0.693201	0.841354
hlu-miR394a	74.8329	0.470818	0.846392	0.556264	0.57803	0.804907
hlu-miR171b	85.2579	1.1438	1.00091	1.14275	0.253141	0.617222
hlu-miR164c	693.378	0.77016	0.3558	2.16459	0.0304192	0.267689
hlu-miR171a	85.2579	1.1438	1.00091	1.14275	0.253141	0.617222
hlu-miR395a	16.8087	-0.454972	1.15324	-0.394515	0.693201	0.841354
hlu-miR156b	177.481	-0.441866	0.516028	-0.856282	0.391842	0.656801
miRNA-744	0	0	0	0	1	NA
hlu-miR169d	79.5544	1.22308	1.01573	1.20414	0.228536	0.617222
hlu-miR172a	504.576	-0.100475	0.625236	-0.1607	0.87233	0.930485
miRNA-769	0	0	0	0	1	NA
miRNA-784	40.147	0.165581	0.807711	0.205	0.837572	0.91289
miRNA-785	40.147	0.165581	0.807711	0.205	0.837572	0.91289
hlu-miR156h	3597.85	0.00719659	0.578565	0.0124387	0.990076	0.990076
miRNA-878	43.5637	0.658429	0.667631	0.986218	0.324026	0.617222
hlu-miR160c	146.129	0.667231	0.456512	1.46158	0.143856	0.617222
miRNA-888	0	0	0	0	1	NA
miRNA-898	82.6569	-2.48544	0.772526	-3.21729	0.00129406	0.0284694
miRNA-910	17.9223	-0.0610691	0.72179	-0.0846079	0.932573	0.949062
miRNA-930	43.5637	0.658429	0.667631	0.986218	0.324026	0.617222
miRNA-935	25.4359	1.08596	3.73339	0.290877	0.771145	0.888205
hlu-miR169h	55.1154	-1.07015	0.775372	-1.38018	0.167532	0.617222
hlu-miR169i	55.1154	-1.07015	0.775372	-1.38018	0.167532	0.617222
hlu-miR166a	10943	-0.133566	0.302715	-0.441229	0.659047	0.816848
hlu-miR169e	79.5544	1.22308	1.01573	1.20414	0.228536	0.617222
miRNA-1021	0	0	0	0	1	NA
miRNA-1024	21.3191	-0.108854	0.778262	-0.139868	0.888764	0.936661
hlu-miR169j	55.1154	-1.07015	0.775372	-1.38018	0.167532	0.617222
hlu-miR169k	55.1154	-1.07015	0.775372	-1.38018	0.167532	0.617222
hlu-miR171c	85.2579	1.1438	1.00091	1.14275	0.253141	0.617222
miRNA-1061	63.7707	-0.621474	0.683617	-0.909096	0.363299	0.652456
miRNA-1065	0	0	0	0	1	NA
hlu-miR156e	2874.43	-0.503555	0.403967	-1.24652	0.212572	0.617222
hlu-miR171d	85.2579	1.1438	1.00091	1.14275	0.253141	0.617222
hlu-miR169n	68.2285	0.339368	0.721003	0.47069	0.637862	0.816848
miRNA-1101	14.9745	-1.70416	1.4282	-1.19322	0.232785	0.617222
miRNA-1102	31.502	-1.0608	0.957804	-1.10754	0.268062	0.617222
hlu-miR162	1062.05	0.507291	0.471635	1.0756	0.282106	0.617222
hlu-miR319c	277.605	1.25504	0.689889	1.81919	0.068882	0.42111
miRNA-1144	9.33573	2.07394	3.75581	0.552196	0.580814	0.804907
hlu-miR167a	3078.56	-1.49339	0.553462	-2.69827	0.00697	0.0876229
hlu-miR167b	3078.56	-1.49339	0.553462	-2.69827	0.00697	0.0876229
hlu-miR166b	10943	-0.133566	0.302715	-0.441229	0.659047	0.816848
hlu-miR169p	69.5824	1.32359	0.768024	1.72338	0.0848204	0.452375
miRNA-1228	106.476	1.11276	0.707027	1.57386	0.11552	0.564765
hlu-miR403a	274.49	-0.214478	0.267532	-0.801691	0.422732	0.676371
hlu-miR156f	2874.43	-0.503555	0.403967	-1.24652	0.212572	0.617222
miRNA-1256	31.4288	0.101314	1.37806	0.0735194	0.941393	0.949062
miRNA-1257	31.4288	0.101314	1.37806	0.0735194	0.941393	0.949062
miRNA-1280	0	0	0	0	1	NA
miRNA-1283	106.476	1.11276	0.707027	1.57386	0.11552	0.564765
hlu-miR319i	179.84	0.592563	0.676109	0.876432	0.380795	0.656801
hlu-miR398b	2518.22	0.496286	0.639719	0.775787	0.437875	0.688089
hlu-miR171e	85.2579	1.1438	1.00091	1.14275	0.253141	0.617222
hlu-miR166c	10943	-0.133566	0.302715	-0.441229	0.659047	0.816848
hlu-miR827a	87.6711	-0.717117	0.866804	-0.827311	0.408061	0.667438
hlu-miR319d	277.605	1.25504	0.689889	1.81919	0.068882	0.42111
hlu-miR477f	613.457	-2.07789	0.581173	-3.57533	0.000349785	0.0102604
miRNA-1427	245.081	-2.61095	0.516717	-5.05295	4.35038e-07	3.82833e-05
hlu-miR396a	1575.86	-0.971847	0.720693	-1.34849	0.177501	0.617222
hlu-miR396b	1575.86	-0.971847	0.720693	-1.34849	0.177501	0.617222
hlu-miR171f	85.2579	1.1438	1.00091	1.14275	0.253141	0.617222
hlu-miR828a	109.283	-3.49655	1.23196	-2.83819	0.00453704	0.0798518
hlu-miR167c	3078.56	-1.49339	0.553462	-2.69827	0.00697	0.0876229
hlu-miR827b	87.6711	-0.717117	0.866804	-0.827311	0.408061	0.667438
miRNA-1496	21.5709	-1.41363	0.974736	-1.45027	0.146982	0.617222
hlu-miR166d	10943	-0.133566	0.302715	-0.441229	0.659047	0.816848
miRNA-1520	9.33573	2.07394	3.75581	0.552196	0.580814	0.804907
hlu-miR395c	52.3014	0.71472	0.995037	0.718285	0.472581	0.729599
hlu-miR167e	2787.67	-0.599891	0.340529	-1.76164	0.0781296	0.443575
hlu-miR319e	277.605	1.25504	0.689889	1.81919	0.068882	0.42111
miRNA-1601	0	0	0	0	1	NA
miRNA-1605	0	0	0	0	1	NA
miRNA-1614	0	0	0	0	1	NA
hlu-miR166f	10943	-0.133566	0.302715	-0.441229	0.659047	0.816848
hlu-miR166g	10943	-0.133566	0.302715	-0.441229	0.659047	0.816848
hlu-miR482b	21835.2	-0.146242	0.594833	-0.245854	0.805795	0.90903
hlu-miR171g	85.2579	1.1438	1.00091	1.14275	0.253141	0.617222
hlu-miR169q	69.5824	1.32359	0.768024	1.72338	0.0848204	0.452375
hlu-miR169o	68.2285	0.339368	0.721003	0.47069	0.637862	0.816848
hlu-miR156c	177.481	-0.441866	0.516028	-0.856282	0.391842	0.656801
hlu-miR477a	616.134	-0.157791	0.838007	-0.188293	0.850647	0.91289
hlu-miR393d	162.138	-0.378583	0.592831	-0.638602	0.523082	0.793642
miRNA-1719	9.33573	2.07394	3.75581	0.552196	0.580814	0.804907
hlu-miR171h	85.2579	1.1438	1.00091	1.14275	0.253141	0.617222
miRNA-1758	25.4359	1.08596	3.73339	0.290877	0.771145	0.888205
hlu-miR403b	274.49	-0.214478	0.267532	-0.801691	0.422732	0.676371
miRNA-1788	0	0	0	0	1	NA
hlu-miR477c	1550.58	-1.23326	0.684952	-1.80051	0.0717801	0.42111
miRNA-1836	0	0	0	0	1	NA
hlu-miR160b	186.964	-0.0799672	0.394765	-0.202569	0.839472	0.91289
hlu-miR159b	19064.9	-0.314344	0.285684	-1.10032	0.271193	0.617222
hlu-miR482c	26992.1	-0.0572218	0.436281	-0.131158	0.89565	0.9383
miRNA-1881	9.33573	2.07394	3.75581	0.552196	0.580814	0.804907
hlu-miR167d	3078.56	-1.49339	0.553462	-2.69827	0.00697	0.0876229
hlu-miR171i	85.2579	1.1438	1.00091	1.14275	0.253141	0.617222
miRNA-1915	197.585	-0.961736	0.399316	-2.40846	0.0160199	0.176219
hlu-miR394d	119.583	0.0998897	0.501467	0.199195	0.84211	0.91289
hlu-miR394b	74.8329	0.470818	0.846392	0.556264	0.57803	0.804907
hlu-miR171j	85.2579	1.1438	1.00091	1.14275	0.253141	0.617222
hlu-miR319f	277.605	1.25504	0.689889	1.81919	0.068882	0.42111
miRNA-1980	9.33573	2.07394	3.75581	0.552196	0.580814	0.804907
miRNA-1983	41.5793	0.928949	0.966877	0.960773	0.336666	0.617222
miRNA-1984	41.5793	0.928949	0.966877	0.960773	0.336666	0.617222
miRNA-1985	39.378	0.814573	1.68192	0.484311	0.628165	0.816848
miRNA-1986	41.5793	0.928949	0.966877	0.960773	0.336666	0.617222
miRNA-1987	41.5793	0.928949	0.966877	0.960773	0.336666	0.617222
miRNA-1988	41.5793	0.928949	0.966877	0.960773	0.336666	0.617222
miRNA-1989	41.5793	0.928949	0.966877	0.960773	0.336666	0.617222
miRNA-1990	41.5793	0.928949	0.966877	0.960773	0.336666	0.617222
miRNA-1991	41.5793	0.928949	0.966877	0.960773	0.336666	0.617222
miRNA-1992	24.5625	-0.459551	1.58692	-0.289587	0.772132	0.888205
miRNA-1993	41.5793	0.928949	0.966877	0.960773	0.336666	0.617222
miRNA-1994	24.5625	-0.459551	1.58692	-0.289587	0.772132	0.888205
miRNA-1995	41.5793	0.928949	0.966877	0.960773	0.336666	0.617222
miRNA-1996	39.378	0.814573	1.68192	0.484311	0.628165	0.816848
miRNA-1997	41.5793	0.928949	0.966877	0.960773	0.336666	0.617222
miRNA-1998	41.5793	0.928949	0.966877	0.960773	0.336666	0.617222
miRNA-1999	41.5793	0.928949	0.966877	0.960773	0.336666	0.617222
miRNA-2006	0	0	0	0	1	NA
hlu-miR477b	616.134	-0.157791	0.838007	-0.188293	0.850647	0.91289
miRNA-2034	432.37	-0.945113	0.8777	-1.07681	0.281567	0.617222
hlu-miR408a	186.347	2.25007	1.22689	1.83396	0.0666593	0.42111
hlu-miR171k	54.8354	0.70035	0.59537	1.17633	0.239465	0.617222
hlu-miR159c	5553.45	1.27823	0.265882	4.80752	1.52816e-06	6.72389e-05
hlu-miR397a	253.834	-0.578083	0.499252	-1.1579	0.246906	0.617222
hlu-miR166e	10943	-0.133566	0.302715	-0.441229	0.659047	0.816848
miRNA-2137	17.2064	0.733439	0.984228	0.745192	0.456156	0.710472
hlu-miR477d	1550.58	-1.23326	0.684952	-1.80051	0.0717801	0.42111
miRNA-2195	0	0	0	0	1	NA
hlu-miR172b	432.849	-0.17943	0.462327	-0.388101	0.697941	0.841354
hlu-miR169l	55.1154	-1.07015	0.775372	-1.38018	0.167532	0.617222
hlu-miR169m	55.1154	-1.07015	0.775372	-1.38018	0.167532	0.617222
hlu-miR159d	5553.45	1.27823	0.265882	4.80752	1.52816e-06	6.72389e-05
hlu-miR160d	146.129	0.667231	0.456512	1.46158	0.143856	0.617222
hlu-miR171l	54.8354	0.70035	0.59537	1.17633	0.239465	0.617222
miRNA-2270	63.7707	-0.621474	0.683617	-0.909096	0.363299	0.652456
hlu-miR408b	186.347	2.25007	1.22689	1.83396	0.0666593	0.42111
miRNA-2317	0	0	0	0	1	NA
miRNA-2346	45.6336	-0.339237	0.595176	-0.569978	0.568692	0.804907
miRNA-2350	0	0	0	0	1	NA
miRNA-2351	0	0	0	0	1	NA
miRNA-2371	9.33573	2.07394	3.75581	0.552196	0.580814	0.804907
hlu-miR535b	6023.47	0.841819	0.406604	2.07037	0.038418	0.307344
hlu-miR166h	10943	-0.133566	0.302715	-0.441229	0.659047	0.816848
miRNA-2424	0	0	0	0	1	NA
miRNA-2452	82.6569	-2.48544	0.772526	-3.21729	0.00129406	0.0284694
hlu-miR397b	253.834	-0.578083	0.499252	-1.1579	0.246906	0.617222
miRNA-2500	45.6336	-0.339237	0.595176	-0.569978	0.568692	0.804907
miRNA-2504	18.0529	0.387865	0.987422	0.392805	0.694463	0.841354
miRNA-2524	25.4359	1.08596	3.73339	0.290877	0.771145	0.888205
miRNA-2527	36.0864	1.64136	1.69394	0.968959	0.332566	0.617222
miRNA-2528	32.8268	2.30813	2.29875	1.00408	0.315341	0.617222
miRNA-2529	32.8268	2.30813	2.29875	1.00408	0.315341	0.617222
miRNA-2530	27.9707	1.1322	2.49955	0.45296	0.650577	0.816848
miRNA-2531	33.4637	0.425089	1.77661	0.23927	0.810896	0.90903
miRNA-2538	432.37	-0.945113	0.8777	-1.07681	0.281567	0.617222
hlu-miR828b	109.283	-3.49655	1.23196	-2.83819	0.00453704	0.0798518
hlu-miR156d	177.481	-0.441866	0.516028	-0.856282	0.391842	0.656801
miRNA-2600	0	0	0	0	1	NA

## Sheet: Table S4
Table S4: Results of differential expression analysis of miRNAs in roots of the resistant cultivar Wye Target performed by DESeq2.
miRNA ID	baseMean	log2 (inoculated/control)	lfcSE	stat	p-value	p-adj
miRNA-1	49.2648	0.0308034	0.542071	0.0568253	0.954684	0.98362
hlu-miR169a	275.38	-0.88396	0.432146	-2.04551	0.0408045	0.231844
miRNA-50	104.613	-0.395397	0.618999	-0.638769	0.522973	0.841372
miRNA-56	0	0	0	0	1	NA
hlu-miR171m	696.497	0.250234	0.216966	1.15333	0.248774	0.739175
hlu-miR394c	142.783	-0.00906964	0.441749	-0.0205312	0.98362	0.98362
hlu-miR156a	402.283	-0.543234	0.452168	-1.2014	0.229597	0.735886
hlu-miR482a	37558.2	0.174122	0.313708	0.555044	0.578864	0.841372
miRNA-143	0	0	0	0	1	NA
hlu-miR393c	204.703	0.527682	0.390762	1.35039	0.17689	0.690976
miRNA-161	0	0	0	0	1	NA
miRNA-164	23.2009	2.33733	1.65603	1.4114	0.158125	NA
hlu-miR390a	186.778	-0.155329	0.444716	-0.349277	0.726881	0.890786
miRNA-195	24.2509	-0.800097	0.525577	-1.52232	0.127928	NA
miRNA-196	19.8793	-0.174929	0.657623	-0.266001	0.790238	NA
hlu-miR160a	59.38	0.661993	0.412176	1.60609	0.108254	0.501175
hlu-miR169b	275.38	-0.88396	0.432146	-2.04551	0.0408045	0.231844
miRNA-228	0	0	0	0	1	NA
hlu-miR169c	275.38	-0.88396	0.432146	-2.04551	0.0408045	0.231844
miRNA-238	0	0	0	0	1	NA
hlu-miR167f	592.299	-0.577722	0.407397	-1.41808	0.156167	0.650694
miRNA-259	17.3649	-2.00455	3.74145	-0.535769	0.592118	NA
miRNA-268	0	0	0	0	1	NA
miRNA-276	0	0	0	0	1	NA
hlu-miR5225	62.5158	-0.618563	0.554905	-1.11472	0.264971	0.752758
miRNA-282	21.8758	0.596731	0.680396	0.877036	0.380467	NA
miRNA-283	40.2454	-0.0625825	0.78622	-0.0795993	0.936556	NA
hlu-miR159a	21546.1	-0.23894	0.186509	-1.28112	0.200152	0.735854
miRNA-317	0	0	0	0	1	NA
miRNA-320	24.2509	-0.800097	0.525577	-1.52232	0.127928	NA
miRNA-330	0	0	0	0	1	NA
hlu-miR156g	20.316	0.177093	0.789451	0.224324	0.822505	NA
miRNA-358	17.3649	-2.00455	3.74145	-0.535769	0.592118	NA
hlu-miR168	298.381	-0.0848202	0.272054	-0.311777	0.75521	0.907704
miRNA-363	244.179	-0.0142154	0.629273	-0.0225902	0.981977	0.98362
hlu-miR156i	74.2077	0.723004	0.398475	1.81443	0.0696115	0.378323
miRNA-416	101.28	0.875099	0.368727	2.3733	0.0176299	0.129631
hlu-miR535a	11635.5	-0.0350976	0.387022	-0.0906861	0.927742	0.98362
miRNA-449	0	0	0	0	1	NA
hlu-miR390b	21.7625	0.548332	1.7046	0.321677	0.747697	NA
hlu-miR390c	21.7625	0.548332	1.7046	0.321677	0.747697	NA
miRNA-464	10.0753	-2.06596	3.75402	-0.550333	0.582091	NA
hlu-miR319g	330.155	-0.230699	0.254016	-0.908209	0.363768	0.841372
hlu-miR319h	330.155	-0.230699	0.254016	-0.908209	0.363768	0.841372
hlu-miR399a	21.3704	-0.110286	1.08362	-0.101776	0.918934	NA
miRNA-503	0	0	0	0	1	NA
miRNA-515	16.3992	-0.273774	1.04041	-0.26314	0.792443	NA
miRNA-534	27.8999	-0.0233578	0.599932	-0.038934	0.968943	NA
hlu-miR164b	1213.4	-0.454887	0.523416	-0.869073	0.384807	0.841372
hlu-miR164a	1213.4	-0.454887	0.523416	-0.869073	0.384807	0.841372
miRNA-566	26.5098	0.239874	0.537989	0.445871	0.655691	NA
miRNA-584	0	0	0	0	1	NA
hlu-miR398a	2672.12	0.274614	0.42232	0.65025	0.515531	0.841372
miRNA-615	0	0	0	0	1	NA
miRNA-617	38.9071	-0.258877	0.597788	-0.433058	0.664972	NA
hlu-miR319a	77.0366	-0.952193	1.3757	-0.692151	0.488843	0.841372
hlu-miR319b	77.0366	-0.952193	1.3757	-0.692151	0.488843	0.841372
miRNA-645	21.5491	0.439116	0.55507	0.7911	0.428886	NA
hlu-miR395b	49.6661	-0.604724	0.976137	-0.619507	0.535582	0.841372
miRNA-665	44.8098	0.734649	0.728887	1.0079	0.3135	NA
hlu-miR394a	148.785	0.342114	0.415456	0.823468	0.410242	0.841372
hlu-miR171b	230.668	0.249992	0.685884	0.364482	0.715498	0.885518
hlu-miR164c	1213.4	-0.454887	0.523416	-0.869073	0.384807	0.841372
hlu-miR171a	230.668	0.249992	0.685884	0.364482	0.715498	0.885518
hlu-miR395a	49.6661	-0.604724	0.976137	-0.619507	0.535582	0.841372
hlu-miR156b	402.283	-0.543234	0.452168	-1.2014	0.229597	0.735886
miRNA-699	0	0	0	0	1	NA
hlu-miR169d	275.38	-0.88396	0.432146	-2.04551	0.0408045	0.231844
hlu-miR172a	433.501	0.419086	0.33157	1.26395	0.20625	0.735886
miRNA-767	17.3649	-2.00455	3.74145	-0.535769	0.592118	NA
miRNA-784	34.1685	0.255357	0.661767	0.385872	0.699591	NA
miRNA-785	34.1685	0.255357	0.661767	0.385872	0.699591	NA
hlu-miR156h	3647.22	0.0834473	0.305527	0.273126	0.784756	0.934234
miRNA-832	0	0	0	0	1	NA
miRNA-878	48.2384	0.154071	0.427659	0.360267	0.718648	NA
hlu-miR160c	260.124	0.025475	0.400534	0.0636025	0.949287	0.98362
miRNA-898	79.7861	-1.51702	0.603604	-2.51327	0.0119618	0.106802
miRNA-910	21.5491	0.439116	0.55507	0.7911	0.428886	NA
miRNA-930	48.2384	0.154071	0.427659	0.360267	0.718648	NA
hlu-miR169h	472.543	-0.621326	0.609386	-1.01959	0.307921	0.769803
hlu-miR169i	472.543	-0.621326	0.609386	-1.01959	0.307921	0.769803
miRNA-968	19.8793	-0.174929	0.657623	-0.266001	0.790238	NA
miRNA-969	19.8793	-0.174929	0.657623	-0.266001	0.790238	NA
miRNA-971	16.3992	-0.273774	1.04041	-0.26314	0.792443	NA
hlu-miR166a	9567.84	-0.169298	0.300571	-0.563253	0.573263	0.841372
hlu-miR169e	275.38	-0.88396	0.432146	-2.04551	0.0408045	0.231844
miRNA-1020	0	0	0	0	1	NA
miRNA-1024	26.5098	0.239874	0.537989	0.445871	0.655691	NA
miRNA-1028	0	0	0	0	1	NA
hlu-miR399e	47.1191	0.418743	0.761317	0.550025	0.582302	NA
miRNA-1034	8.26451	-2.00554	3.75955	-0.533452	0.593721	NA
hlu-miR169j	472.543	-0.621326	0.609386	-1.01959	0.307921	0.769803
hlu-miR169k	472.543	-0.621326	0.609386	-1.01959	0.307921	0.769803
hlu-miR171c	230.668	0.249992	0.685884	0.364482	0.715498	0.885518
miRNA-1061	70.1993	-0.328857	0.463826	-0.70901	0.478318	0.841372
hlu-miR156e	3920.53	-0.649337	0.248825	-2.60961	0.0090646	0.0944229
hlu-miR171d	230.668	0.249992	0.685884	0.364482	0.715498	0.885518
hlu-miR169n	130.962	-0.306545	0.708287	-0.432798	0.665162	0.885518
miRNA-1101	23.212	-0.514027	0.681042	-0.754766	0.450389	NA
miRNA-1102	48.3946	-0.258086	0.402616	-0.641024	0.521507	NA
hlu-miR162	1150.7	0.0555572	0.229219	0.242376	0.808489	0.935751
hlu-miR399b	47.1191	0.418743	0.761317	0.550025	0.582302	NA
hlu-miR399c	47.1191	0.418743	0.761317	0.550025	0.582302	NA
hlu-miR399d	47.1191	0.418743	0.761317	0.550025	0.582302	NA
hlu-miR319c	254.285	0.851877	0.217361	3.91918	8.88522e-05	0.00277663
miRNA-1134	0	0	0	0	1	NA
miRNA-1165	0	0	0	0	1	NA
miRNA-1178	0	0	0	0	1	NA
miRNA-1183	0	0	0	0	1	NA
hlu-miR167a	3428.96	-0.0357254	0.365689	-0.0976932	0.922176	0.98362
hlu-miR167b	3428.96	-0.0357254	0.365689	-0.0976932	0.922176	0.98362
hlu-miR166b	9567.84	-0.169298	0.300571	-0.563253	0.573263	0.841372
hlu-miR169p	325.511	-0.512053	0.676338	-0.757097	0.448992	0.841372
miRNA-1228	101.28	0.875099	0.368727	2.3733	0.0176299	0.129631
hlu-miR403a	391.737	0.298313	0.185271	1.61015	0.107365	0.501175
hlu-miR156f	3920.53	-0.649337	0.248825	-2.60961	0.0090646	0.0944229
miRNA-1283	101.28	0.875099	0.368727	2.3733	0.0176299	0.129631
miRNA-1294	0	0	0	0	1	NA
hlu-miR399f	47.1191	0.418743	0.761317	0.550025	0.582302	NA
hlu-miR399h	47.1191	0.418743	0.761317	0.550025	0.582302	NA
hlu-miR319i	330.155	-0.230699	0.254016	-0.908209	0.363768	0.841372
hlu-miR398b	2672.12	0.274614	0.42232	0.65025	0.515531	0.841372
hlu-miR171e	230.668	0.249992	0.685884	0.364482	0.715498	0.885518
hlu-miR166c	9567.84	-0.169298	0.300571	-0.563253	0.573263	0.841372
hlu-miR827a	104.188	-0.0144008	0.265611	-0.0542177	0.956762	0.98362
hlu-miR319d	254.285	0.851877	0.217361	3.91918	8.88522e-05	0.00277663
hlu-miR477f	596.23	-1.64747	0.552243	-2.98323	0.00285224	0.0509329
miRNA-1427	244.179	-0.0142154	0.629273	-0.0225902	0.981977	0.98362
hlu-miR396a	3197.42	-0.18398	0.474499	-0.387735	0.698212	0.885518
hlu-miR396b	3197.42	-0.18398	0.474499	-0.387735	0.698212	0.885518
miRNA-1436	17.3649	-2.00455	3.74145	-0.535769	0.592118	NA
hlu-miR171f	230.668	0.249992	0.685884	0.364482	0.715498	0.885518
hlu-miR828a	178.656	-0.91743	0.804746	-1.14002	0.254276	0.739175
miRNA-1474	0	0	0	0	1	NA
hlu-miR167c	3428.96	-0.0357254	0.365689	-0.0976932	0.922176	0.98362
hlu-miR827b	104.188	-0.0144008	0.265611	-0.0542177	0.956762	0.98362
miRNA-1496	41.6665	-0.262661	0.42613	-0.616387	0.537639	NA
hlu-miR166d	9567.84	-0.169298	0.300571	-0.563253	0.573263	0.841372
miRNA-1511	16.0492	0.00898752	0.662461	0.0135669	0.989176	NA
miRNA-1516	0	0	0	0	1	NA
hlu-miR395c	142.13	-1.12302	0.955235	-1.17564	0.239737	0.739175
hlu-miR167e	2959.6	0.323388	0.189194	1.70929	0.0873974	0.455195
hlu-miR319e	254.285	0.851877	0.217361	3.91918	8.88522e-05	0.00277663
hlu-miR166f	9567.84	-0.169298	0.300571	-0.563253	0.573263	0.841372
hlu-miR166g	9567.84	-0.169298	0.300571	-0.563253	0.573263	0.841372
hlu-miR482b	37558.2	0.174122	0.313708	0.555044	0.578864	0.841372
hlu-miR171g	230.668	0.249992	0.685884	0.364482	0.715498	0.885518
hlu-miR169q	325.511	-0.512053	0.676338	-0.757097	0.448992	0.841372
hlu-miR169o	130.962	-0.306545	0.708287	-0.432798	0.665162	0.885518
hlu-miR156c	402.283	-0.543234	0.452168	-1.2014	0.229597	0.735886
miRNA-1703	10.0753	-2.06596	3.75402	-0.550333	0.582091	NA
miRNA-1705	0	0	0	0	1	NA
hlu-miR477a	1274.73	-0.287068	0.35728	-0.803482	0.421696	0.841372
hlu-miR393d	204.703	0.527682	0.390762	1.35039	0.17689	0.690976
hlu-miR171h	230.668	0.249992	0.685884	0.364482	0.715498	0.885518
hlu-miR403b	391.737	0.298313	0.185271	1.61015	0.107365	0.501175
miRNA-1769	10.0753	-2.06596	3.75402	-0.550333	0.582091	NA
miRNA-1785	16.3041	-0.237336	0.895572	-0.26501	0.791001	NA
miRNA-1797	0	0	0	0	1	NA
miRNA-1820	10.0753	-2.06596	3.75402	-0.550333	0.582091	NA
hlu-miR477c	4700.64	-0.0221634	0.480312	-0.0461437	0.963196	0.98362
miRNA-1851	0	0	0	0	1	NA
hlu-miR160b	197.337	1.20807	0.438074	2.75768	0.00582137	0.0727671
hlu-miR159b	21546.1	-0.23894	0.186509	-1.28112	0.200152	0.735854
hlu-miR482c	37054.2	-0.253439	0.491331	-0.515821	0.605979	0.87066
hlu-miR167d	3428.96	-0.0357254	0.365689	-0.0976932	0.922176	0.98362
hlu-miR171i	230.668	0.249992	0.685884	0.364482	0.715498	0.885518
miRNA-1914	23.2009	2.33733	1.65603	1.4114	0.158125	NA
miRNA-1915	420.355	0.216308	0.666938	0.32433	0.745688	0.904962
hlu-miR394d	142.783	-0.00906964	0.441749	-0.0205312	0.98362	0.98362
hlu-miR394b	148.785	0.342114	0.415456	0.823468	0.410242	0.841372
hlu-miR171j	230.668	0.249992	0.685884	0.364482	0.715498	0.885518
hlu-miR319f	254.285	0.851877	0.217361	3.91918	8.88522e-05	0.00277663
miRNA-1960	0	0	0	0	1	NA
miRNA-1976	0	0	0	0	1	NA
miRNA-1983	21.4234	0.350753	0.637587	0.550126	0.582233	NA
miRNA-1984	21.4234	0.350753	0.637587	0.550126	0.582233	NA
miRNA-1985	21.4234	0.350753	0.637587	0.550126	0.582233	NA
miRNA-1986	21.4234	0.350753	0.637587	0.550126	0.582233	NA
miRNA-1987	21.4234	0.350753	0.637587	0.550126	0.582233	NA
miRNA-1988	21.4234	0.350753	0.637587	0.550126	0.582233	NA
miRNA-1990	21.4234	0.350753	0.637587	0.550126	0.582233	NA
miRNA-1991	21.4234	0.350753	0.637587	0.550126	0.582233	NA
miRNA-1992	17.6789	-0.202852	1.60957	-0.126029	0.899709	NA
miRNA-1993	21.4234	0.350753	0.637587	0.550126	0.582233	NA
miRNA-1994	17.6789	-0.202852	1.60957	-0.126029	0.899709	NA
miRNA-1995	21.4234	0.350753	0.637587	0.550126	0.582233	NA
miRNA-1997	21.4234	0.350753	0.637587	0.550126	0.582233	NA
miRNA-1998	17.8911	1.00161	1.43791	0.696576	0.486068	NA
miRNA-1999	17.8911	1.00161	1.43791	0.696576	0.486068	NA
miRNA-2007	14.7254	-2.06673	3.21709	-0.642423	0.520599	NA
miRNA-2010	16.3992	-0.273774	1.04041	-0.26314	0.792443	NA
hlu-miR477b	1274.73	-0.287068	0.35728	-0.803482	0.421696	0.841372
miRNA-2026	10.0753	-2.06596	3.75402	-0.550333	0.582091	NA
miRNA-2034	1041.21	-0.47135	0.59044	-0.798302	0.424695	0.841372
hlu-miR408a	159.876	-1.41333	0.492451	-2.86999	0.00410491	0.0570126
hlu-miR171k	134.905	-0.469202	0.330852	-1.41816	0.156144	0.650694
hlu-miR159c	5164.99	0.952454	0.250228	3.80635	0.000141033	0.00293819
hlu-miR397a	462.333	0.42043	0.695959	0.604102	0.545776	0.841372
miRNA-2104	0	0	0	0	1	NA
hlu-miR166e	9567.84	-0.169298	0.300571	-0.563253	0.573263	0.841372
miRNA-2130	0	0	0	0	1	NA
miRNA-2137	19.8591	0.625518	0.964288	0.648684	0.516543	NA
hlu-miR477d	4700.64	-0.0221634	0.480312	-0.0461437	0.963196	0.98362
miRNA-2145	0	0	0	0	1	NA
miRNA-2153	0	0	0	0	1	NA
miRNA-2166	16.0492	0.00898752	0.662461	0.0135669	0.989176	NA
miRNA-2177	20.1555	0.122558	0.551979	0.222034	0.824287	NA
hlu-miR172b	1024.92	0.141882	0.232523	0.610182	0.541741	0.841372
miRNA-2216	0	0	0	0	1	NA
miRNA-2226	44.8098	0.734649	0.728887	1.0079	0.3135	NA
miRNA-2236	19.5967	-0.71103	3.34685	-0.212447	0.831758	NA
hlu-miR169l	472.543	-0.621326	0.609386	-1.01959	0.307921	0.769803
hlu-miR169m	472.543	-0.621326	0.609386	-1.01959	0.307921	0.769803
hlu-miR159d	5164.99	0.952454	0.250228	3.80635	0.000141033	0.00293819
hlu-miR160d	260.124	0.025475	0.400534	0.0636025	0.949287	0.98362
hlu-miR171l	134.905	-0.469202	0.330852	-1.41816	0.156144	0.650694
miRNA-2270	70.1993	-0.328857	0.463826	-0.70901	0.478318	0.841372
miRNA-2299	0	0	0	0	1	NA
hlu-miR408b	159.876	-1.41333	0.492451	-2.86999	0.00410491	0.0570126
miRNA-2328	22.9931	-0.790845	3.73358	-0.211819	0.832248	NA
miRNA-2333	0	0	0	0	1	NA
miRNA-2346	53.9912	0.0987175	0.39665	0.248878	0.803455	0.935751
miRNA-2376	20.1555	0.122558	0.551979	0.222034	0.824287	NA
miRNA-2390	0	0	0	0	1	NA
hlu-miR535b	11635.5	-0.0350976	0.387022	-0.0906861	0.927742	0.98362
hlu-miR166h	9567.84	-0.169298	0.300571	-0.563253	0.573263	0.841372
miRNA-2452	79.7861	-1.51702	0.603604	-2.51327	0.0119618	0.106802
miRNA-2474	44.8098	0.734649	0.728887	1.0079	0.3135	NA
hlu-miR397b	462.333	0.42043	0.695959	0.604102	0.545776	0.841372
miRNA-2500	53.9912	0.0987175	0.39665	0.248878	0.803455	0.935751
miRNA-2527	16.1707	0.483857	2.39226	0.202259	0.839714	NA
miRNA-2528	21.4234	0.350753	0.637587	0.550126	0.582233	NA
miRNA-2529	18.1999	0.945506	1.53313	0.616716	0.537422	NA
miRNA-2530	16.1707	0.483857	2.39226	0.202259	0.839714	NA
miRNA-2531	18.1999	0.945506	1.53313	0.616716	0.537422	NA
miRNA-2537	44.8098	0.734649	0.728887	1.0079	0.3135	NA
miRNA-2538	1041.21	-0.47135	0.59044	-0.798302	0.424695	0.841372
hlu-miR828b	178.656	-0.91743	0.804746	-1.14002	0.254276	0.739175
miRNA-2587	0	0	0	0	1	NA
miRNA-2589	0	0	0	0	1	NA
hlu-miR156d	402.283	-0.543234	0.452168	-1.2014	0.229597	0.735886

## Sheet: Table S5
Table S5: Results of differential expression analysis of miRNAs between root samples of the susceptible cultivar Celeia and the resistant cultivar Wye Target in response to inoculation with Verticillium nonalfalfae.
miRNA ID	baseMean	log2(resistant/susceptible)	lfcSE	stat	p-value	p-adj
miRNA-1	34.847	-0.87585	0.98965	-0.88501	0.376151	0.885977
miRNA-50	93.9882	1.60482	1.04381	1.53747	0.124178	0.616887
hlu-miR171i	565.124	0.192588	0.348348	0.552861	0.580358	0.932874
hlu-miR394c	131.49	-0.216445	0.615242	-0.351805	0.724985	0.932874
hlu-miR156a	268.834	-0.20782	0.633051	-0.328284	0.742697	0.932874
hlu-miR482a	28286.9	0.261759	0.638863	0.409727	0.682006	0.932874
miRNA-143	0	0	0	0	1	NA
hlu-miR393c	180.953	0.802982	0.627691	1.27926	0.200804	0.719095
hlu-miR390a	210.206	-2.23116	0.916413	-2.43466	0.0149056	0.244647
miRNA-195	16.9924	-0.798669	1.02557	-0.778758	0.436122	0.906746
hlu-miR160a	55.2425	-0.48921	0.765226	-0.639302	0.522626	0.906746
hlu-miR169a	158.294	-2.16195	0.979702	-2.20674	0.0273323	0.244647
hlu-miR169b	158.294	-2.16195	0.979702	-2.20674	0.0273323	0.244647
hlu-miR167f	911.433	1.34222	0.642294	2.08973	0.0366421	0.244647
hlu-miR5225	72.3136	-1.65762	0.972623	-1.70428	0.0883294	0.523182
miRNA-283	37.3659	-0.202035	1.12101	-0.180225	0.856976	0.932874
hlu-miR159a	20402.5	-0.0398054	0.362555	-0.109791	0.912575	0.932874
miRNA-320	16.9924	-0.798669	1.02557	-0.778758	0.436122	0.906746
miRNA-335	15.2468	0.44451	1.38522	0.320896	0.748289	0.932874
hlu-miR168	211.951	0.279774	0.41181	0.679376	0.4969	0.906746
miRNA-363	240.31	2.42401	0.758616	3.19531	0.0013968	0.107554
hlu-miR156h	51.9491	0.261383	0.731543	0.357304	0.720864	0.932874
hlu-miR535a	8637.67	-1.03975	0.643701	-1.61527	0.106252	0.564232
hlu-miR319g	243.765	-0.907317	0.664443	-1.36553	0.172086	0.662532
hlu-miR319h	243.765	-0.907317	0.664443	-1.36553	0.172086	0.662532
miRNA-534	34.3457	0.259757	1.06839	0.243128	0.807906	0.932874
hlu-miR164b	935.213	-1.39822	0.674332	-2.07349	0.0381268	0.244647
hlu-miR164a	935.213	-1.39822	0.674332	-2.07349	0.0381268	0.244647
miRNA-566	24.1491	0.180129	0.93583	0.19248	0.847366	0.932874
hlu-miR398a	2738.94	-0.44107	0.824252	-0.535116	0.59257	0.932874
miRNA-615	0	0	0	0	1	NA
miRNA-617	18.9047	-6.35061	2.59551	-2.44677	0.0144143	0.244647
hlu-miR319a	365.949	-1.38811	1.73008	-0.802337	0.422358	0.906746
hlu-miR319b	365.949	-1.38811	1.73008	-0.802337	0.422358	0.906746
miRNA-645	19.8309	0.39188	0.890343	0.440145	0.659832	0.932874
hlu-miR395b	29.6634	-0.219747	1.34297	-0.163628	0.870024	0.932874
miRNA-665	44.2686	-1.01824	1.59813	-0.637148	0.524029	0.906746
hlu-miR394a	105.254	-0.207766	0.813175	-0.2555	0.798337	0.932874
hlu-miR171a	144.628	-0.939817	1.06984	-0.878466	0.379691	0.885977
hlu-miR164c	935.213	-1.39822	0.674332	-2.07349	0.0381268	0.244647
hlu-miR395a	29.6634	-0.219747	1.34297	-0.163628	0.870024	0.932874
hlu-miR156b	268.834	-0.20782	0.633051	-0.328284	0.742697	0.932874
hlu-miR169c	158.294	-2.16195	0.979702	-2.20674	0.0273323	0.244647
hlu-miR172a	497.807	0.328334	0.750906	0.437251	0.661929	0.932874
miRNA-784	39.8686	-0.107974	1.03464	-0.104359	0.916885	0.932874
miRNA-785	39.8686	-0.107974	1.03464	-0.104359	0.916885	0.932874
hlu-miR156g	3757.26	-0.108878	0.708293	-0.153719	0.877831	0.932874
miRNA-832	0	0	0	0	1	NA
miRNA-878	47.7203	-0.69113	0.796339	-0.867884	0.385458	0.885977
hlu-miR160c	199.778	-0.803832	0.641413	-1.25322	0.210125	0.719095
miRNA-898	80.1739	0.818648	0.930831	0.87948	0.379141	0.885977
miRNA-910	19.8309	0.39188	0.890343	0.440145	0.659832	0.932874
miRNA-930	47.7203	-0.69113	0.796339	-0.867884	0.385458	0.885977
hlu-miR169g	255.265	-1.73961	1.2493	-1.39247	0.163779	0.662532
hlu-miR169h	255.265	-1.73961	1.2493	-1.39247	0.163779	0.662532
hlu-miR166a	10693.2	-0.194243	0.479762	-0.404874	0.68557	0.932874
hlu-miR169d	158.294	-2.16195	0.979702	-2.20674	0.0273323	0.244647
miRNA-1020	0	0	0	0	1	NA
miRNA-1024	24.1491	0.180129	0.93583	0.19248	0.847366	0.932874
hlu-miR399d	25.4968	0.132561	1.28171	0.103425	0.917625	0.932874
hlu-miR169i	255.265	-1.73961	1.2493	-1.39247	0.163779	0.662532
hlu-miR169j	255.265	-1.73961	1.2493	-1.39247	0.163779	0.662532
miRNA-1061	66.9988	0.139056	0.765984	0.181539	0.855945	0.932874
hlu-miR156e	3336.58	-0.314423	0.51209	-0.614	0.539215	0.912518
hlu-miR171b	144.628	-0.939817	1.06984	-0.878466	0.379691	0.885977
miRNA-1101	18.183	1.03867	1.3265	0.783018	0.433616	0.906746
miRNA-1102	38.1178	0.716464	0.936021	0.765436	0.444012	0.906746
hlu-miR162	1152.97	-0.643028	0.598124	-1.07508	0.282341	0.885977
hlu-miR399b	25.4968	0.132561	1.28171	0.103425	0.917625	0.932874
hlu-miR399c	25.4968	0.132561	1.28171	0.103425	0.917625	0.932874
hlu-miR319c	288.049	-0.563094	0.773489	-0.727993	0.466618	0.906746
hlu-miR167a	3188.65	1.34639	0.620514	2.1698	0.030022	0.244647
hlu-miR167b	3188.65	1.34639	0.620514	2.1698	0.030022	0.244647
hlu-miR166b	10693.2	-0.194243	0.479762	-0.404874	0.68557	0.932874
hlu-miR169m	175.38	-1.95969	0.944608	-2.0746	0.0380236	0.244647
hlu-miR403a	329.043	0.37452	0.375997	0.99607	0.319216	0.885977
hlu-miR156f	3336.58	-0.314423	0.51209	-0.614	0.539215	0.912518
miRNA-1256	23.5212	-1.07691	1.63459	-0.658826	0.510008	0.906746
miRNA-1257	23.5212	-1.07691	1.63459	-0.658826	0.510008	0.906746
hlu-miR399e	25.4968	0.132561	1.28171	0.103425	0.917625	0.932874
hlu-miR399f	25.4968	0.132561	1.28171	0.103425	0.917625	0.932874
hlu-miR319i	243.765	-0.907317	0.664443	-1.36553	0.172086	0.662532
hlu-miR398b	2738.94	-0.44107	0.824252	-0.535116	0.59257	0.932874
hlu-miR171c	144.628	-0.939817	1.06984	-0.878466	0.379691	0.885977
hlu-miR166c	10693.2	-0.194243	0.479762	-0.404874	0.68557	0.932874
hlu-miR827a	96.2168	0.588614	0.907905	0.648321	0.516777	0.906746
hlu-miR319d	288.049	-0.563094	0.773489	-0.727993	0.466618	0.906746
hlu-miR477f	598.981	0.22772	0.789197	0.288547	0.772928	0.932874
miRNA-1427	240.31	2.42401	0.758616	3.19531	0.0013968	0.107554
hlu-miR396a	2205.37	0.710306	0.801652	0.886052	0.375589	0.885977
hlu-miR396b	2205.37	0.710306	0.801652	0.886052	0.375589	0.885977
hlu-miR171d	144.628	-0.939817	1.06984	-0.878466	0.379691	0.885977
hlu-miR828a	133.596	2.5146	1.20677	2.08374	0.0371838	0.244647
hlu-miR167c	3188.65	1.34639	0.620514	2.1698	0.030022	0.244647
hlu-miR827b	96.2168	0.588614	0.907905	0.648321	0.516777	0.906746
miRNA-1496	29.5157	1.02092	0.940535	1.08546	0.277717	0.885977
hlu-miR166d	10693.2	-0.194243	0.479762	-0.404874	0.68557	0.932874
hlu-miR395c	90.5263	-2.00471	1.2849	-1.56021	0.118711	0.609385
hlu-miR167e	2922.96	0.756656	0.467439	1.61873	0.105506	0.564232
hlu-miR319e	288.049	-0.563094	0.773489	-0.727993	0.466618	0.906746
hlu-miR166f	10693.2	-0.194243	0.479762	-0.404874	0.68557	0.932874
hlu-miR166g	10693.2	-0.194243	0.479762	-0.404874	0.68557	0.932874
hlu-miR482b	28286.9	0.261759	0.638863	0.409727	0.682006	0.932874
hlu-miR171e	144.628	-0.939817	1.06984	-0.878466	0.379691	0.885977
hlu-miR169n	175.38	-1.95969	0.944608	-2.0746	0.0380236	0.244647
hlu-miR156c	268.834	-0.20782	0.633051	-0.328284	0.742697	0.932874
hlu-miR477a	877.677	-0.199944	0.85083	-0.234998	0.81421	0.932874
hlu-miR393d	180.953	0.802982	0.627691	1.27926	0.200804	0.719095
hlu-miR403b	329.043	0.37452	0.375997	0.99607	0.319216	0.885977
hlu-miR477c	3051.94	0.290385	0.996259	0.291475	0.770688	0.932874
hlu-miR160b	197.7	1.10865	0.59566	1.86121	0.0627146	0.386322
hlu-miR159b	20402.5	-0.0398054	0.362555	-0.109791	0.912575	0.932874
hlu-miR482c	31422.4	-0.290192	0.650924	-0.445816	0.65573	0.932874
hlu-miR167d	3188.65	1.34639	0.620514	2.1698	0.030022	0.244647
hlu-miR171f	144.628	-0.939817	1.06984	-0.878466	0.379691	0.885977
miRNA-1915	290.276	1.05364	0.782034	1.3473	0.177883	0.668146
hlu-miR394d	131.49	-0.216445	0.615242	-0.351805	0.724985	0.932874
hlu-miR394b	105.254	-0.207766	0.813175	-0.2555	0.798337	0.932874
hlu-miR319f	288.049	-0.563094	0.773489	-0.727993	0.466618	0.906746
miRNA-1983	36.652	-0.791868	1.15595	-0.685037	0.493321	0.906746
miRNA-1998	35.2148	-0.114914	1.47462	-0.0779278	0.937886	0.937886
miRNA-1999	35.2148	-0.114914	1.47462	-0.0779278	0.937886	0.937886
hlu-miR477b	877.677	-0.199944	0.85083	-0.234998	0.81421	0.932874
miRNA-2034	668.539	0.43503	0.96197	0.452228	0.651105	0.932874
hlu-miR408a	196.276	-3.9031	1.3269	-2.94152	0.00326609	0.125744
hlu-miR171g	88.2309	-1.29184	0.601521	-2.14762	0.0317441	0.244647
hlu-miR159c	5726.13	-0.447386	0.447229	-1.00035	0.317142	0.885977
hlu-miR397a	346.083	0.814884	0.866138	0.940825	0.346794	0.885977
hlu-miR166e	10693.2	-0.194243	0.479762	-0.404874	0.68557	0.932874
miRNA-2137	19.083	-0.256754	1.30611	-0.19658	0.844156	0.932874
hlu-miR477d	3051.94	0.290385	0.996259	0.291475	0.770688	0.932874
miRNA-2177	18.0224	0.102137	1.02673	0.0994782	0.920759	0.932874
hlu-miR172b	681.619	0.161157	0.538497	0.299273	0.764732	0.932874
miRNA-2226	44.2686	-1.01824	1.59813	-0.637148	0.524029	0.906746
hlu-miR169k	255.265	-1.73961	1.2493	-1.39247	0.163779	0.662532
hlu-miR169l	255.265	-1.73961	1.2493	-1.39247	0.163779	0.662532
hlu-miR159d	5726.13	-0.447386	0.447229	-1.00035	0.317142	0.885977
hlu-miR160d	199.778	-0.803832	0.641413	-1.25322	0.210125	0.719095
hlu-miR171h	88.2309	-1.29184	0.601521	-2.14762	0.0317441	0.244647
miRNA-2270	66.9988	0.139056	0.765984	0.181539	0.855945	0.932874
hlu-miR408b	196.276	-3.9031	1.3269	-2.94152	0.00326609	0.125744
miRNA-2346	50.123	0.289201	0.714955	0.404503	0.685843	0.932874
miRNA-2376	18.0224	0.102137	1.02673	0.0994782	0.920759	0.932874
hlu-miR535b	8637.67	-1.03975	0.643701	-1.61527	0.106252	0.564232
hlu-miR166h	10693.2	-0.194243	0.479762	-0.404874	0.68557	0.932874
miRNA-2452	80.1739	0.818648	0.930831	0.87948	0.379141	0.885977
miRNA-2474	44.2686	-1.01824	1.59813	-0.637148	0.524029	0.906746
hlu-miR397b	346.083	0.814884	0.866138	0.940825	0.346794	0.885977
miRNA-2500	50.123	0.289201	0.714955	0.404503	0.685843	0.932874
miRNA-2527	31.4874	-1.35479	2.45205	-0.552512	0.580598	0.932874
miRNA-2528	31.6538	-2.16536	1.99134	-1.08739	0.276864	0.885977
miRNA-2529	30.4514	-1.59362	2.39614	-0.665075	0.506002	0.906746
miRNA-2530	25.884	-0.875423	2.98437	-0.293336	0.769265	0.932874
miRNA-2531	29.8462	0.253722	2.11785	0.119802	0.90464	0.932874
miRNA-2537	44.2686	-1.01824	1.59813	-0.637148	0.524029	0.906746
miRNA-2538	668.539	0.43503	0.96197	0.452228	0.651105	0.932874
hlu-miR828b	133.596	2.5146	1.20677	2.08374	0.0371838	0.244647
hlu-miR156d	268.834	-0.20782	0.633051	-0.328284	0.742697	0.932874

## Sheet: Table S6
Table S6: Enriched GO terms of genes targeted by identified differentially miRNAs in the susceptible hop cultivar Celeia. GO analysis was performed with TopGO.
GO ontology	GO ID	Term	Annotated	Significant	Expected	Fisher p-value
Biological process	GO:0006621	protein retention in ER lumen	9	1	0	0.0045
	GO:0035437	maintenance of protein localization in endoplasmic reticulum	9	1	0	0.0045
	GO:0072595	maintenance of protein localization in organelle	9	1	0	0.0045
	GO:0032507	maintenance of protein location in cell	14	1	0.01	0.007
	GO:0045185	maintenance of protein location	14	1	0.01	0.007
	GO:0051651	maintenance of location in cell	20	1	0.01	0.01
	GO:0016192	vesicle-mediated transport	343	2	0.17	0.0114
	GO:0051235	maintenance of location	24	1	0.01	0.012
	GO:0042147	retrograde transport, endosome to Golgi	30	1	0.02	0.015
	GO:0016482	cytosolic transport	31	1	0.02	0.0155
	GO:0016197	endosomal transport	41	1	0.02	0.0204
	GO:0070972	protein localization to endoplasmic reticulum	41	1	0.02	0.0204
	GO:0046907	intracellular transport	481	2	0.24	0.0218
	GO:0051649	establishment of localization in cell	498	2	0.25	0.0233
	GO:0006810	transport	1454	3	0.73	0.0271
	GO:0051641	cellular localization	546	2	0.27	0.0277
	GO:0051234	establishment of localization	1476	3	0.74	0.0283
	GO:0046148	pigment biosynthetic process	59	1	0.03	0.0293
	GO:0051179	localization	1505	3	0.76	0.0298
	GO:0006888	ER to Golgi vesicle-mediated transport	66	1	0.03	0.0327
	GO:0042440	pigment metabolic process	68	1	0.03	0.0337
Molecular function	GO:0046923	ER retention sequence binding	9	1	0	0.0035
	GO:0004097	catechol oxidase activity	13	1	0.01	0.0051
	GO:0005048	signal sequence binding	37	1	0.01	0.0143
	GO:0016682	oxidoreductase activity, acting on diphenols and related substances as donors, oxygen as acceptor	49	1	0.02	0.0189
	GO:0042277	peptide binding	49	1	0.02	0.0189
	GO:0016679	oxidoreductase activity, acting on diphenols and related substances as donors	57	1	0.02	0.022
	GO:0033218	amide binding	68	1	0.03	0.0262

## Sheet: Table S7
Table S7: Enriched GO terms of genes targeted by identified differentially miRNAs in the resistant hop cultivar Wye Target. GO analysis was performed with TopGO.
GO ontology	GO ID	Term	Annotated	Significant	Expected	Fisher p-value
Biological process	GO:0009734	auxin-activated signaling pathway	82	3	0.03	3.1e-06
	GO:0071365	cellular response to auxin stimulus	82	3	0.03	3.1e-06
	GO:0009733	response to auxin	113	3	0.05	8.2e-06
	GO:0009755	hormone-mediated signaling pathway	140	3	0.06	1.6e-05
	GO:0032870	cellular response to hormone stimulus	141	3	0.06	1.6e-05
	GO:0071495	cellular response to endogenous stimulus	143	3	0.06	1.7e-05
	GO:0071310	cellular response to organic substance	159	3	0.07	2.3e-05
	GO:0009725	response to hormone	220	3	0.09	6e-05
	GO:0009719	response to endogenous stimulus	222	3	0.09	6.2e-05
	GO:0070887	cellular response to chemical stimulus	227	3	0.1	6.6e-05
	GO:0010033	response to organic substance	262	3	0.11	0.0001
	GO:0042221	response to chemical	399	3	0.17	0.00035
	GO:0007165	signal transduction	603	3	0.25	0.00119
	GO:0023052	signaling	605	3	0.25	0.0012
	GO:0006355	regulation of transcription, DNA-templated	756	3	0.32	0.0023
	GO:1903506	regulation of nucleic acid-templated transcription	756	3	0.32	0.0023
	GO:2001141	regulation of RNA biosynthetic process	756	3	0.32	0.0023
	GO:0051252	regulation of RNA metabolic process	793	3	0.33	0.00264
	GO:0007154	cell communication	826	3	0.35	0.00297
	GO:0010556	regulation of macromolecule biosynthetic process	827	3	0.35	0.00298
	GO:2000112	regulation of cellular macromolecule biosynthetic process	827	3	0.35	0.00298
	GO:0019219	regulation of nucleobase-containing compound metabolic process	829	3	0.35	0.003
	GO:0031326	regulation of cellular biosynthetic process	839	3	0.35	0.00311
	GO:0009889	regulation of biosynthetic process	843	3	0.35	0.00315
	GO:0006351	transcription, DNA-templated	952	3	0.4	0.00448
	GO:0097659	nucleic acid-templated transcription	952	3	0.4	0.00448
	GO:0032774	RNA biosynthetic process	953	3	0.4	0.00449
	GO:0051171	regulation of nitrogen compound metabolic process	965	3	0.4	0.00465
	GO:0080090	regulation of primary metabolic process	975	3	0.41	0.00479
	GO:0010468	regulation of gene expression	995	3	0.42	0.00508
	GO:0031323	regulation of cellular metabolic process	1003	3	0.42	0.0052
	GO:0051716	cellular response to stimulus	1093	3	0.46	0.00665
	GO:0060255	regulation of macromolecule metabolic process	1118	3	0.47	0.00709
	GO:0019222	regulation of metabolic process	1165	3	0.49	0.00798
	GO:0034654	nucleobase-containing compound biosynthetic process	1234	3	0.52	0.00939
	GO:0018130	heterocycle biosynthetic process	1373	3	0.58	0.0127
	GO:0019438	aromatic compound biosynthetic process	1418	3	0.59	0.0139
	GO:1901362	organic cyclic compound biosynthetic process	1519	3	0.64	0.01686
	GO:0090304	nucleic acid metabolic process	3103	4	1.3	0.01807
	GO:0050794	regulation of cellular process	1755	3	0.74	0.02517
	GO:0016070	RNA metabolic process	1794	3	0.75	0.02674
	GO:0050896	response to stimulus	1833	3	0.77	0.02836
	GO:0006139	nucleobase-containing compound metabolic process	3503	4	1.47	0.02837
	GO:0046483	heterocycle metabolic process	3689	4	1.55	0.03432
	GO:0050789	regulation of biological process	1989	3	0.83	0.03545
	GO:0006725	cellular aromatic compound metabolic process	3791	4	1.59	0.03793
	GO:0044271	cellular nitrogen compound biosynthetic process	2077	3	0.87	0.03987
	GO:1901360	organic cyclic compound metabolic process	3872	4	1.62	0.04098
	GO:0034645	cellular macromolecule biosynthetic process	2216	3	0.93	0.04747
	GO:0009059	macromolecule biosynthetic process	2235	3	0.94	0.04857
	GO:0065007	biological regulation	2248	3	0.94	0.04933
Molecular function	GO:0003677	DNA binding	1703	13	1.33	3.7e-12
	GO:0003676	nucleic acid binding	4811	14	3.75	1.1e-07
	GO:1901363	heterocyclic compound binding	10331	14	8.04	0.0022
	GO:0097159	organic cyclic compound binding	10333	14	8.05	0.0022
	GO:0046872	metal ion binding	3721	8	2.9	0.0037
	GO:0043169	cation binding	3748	8	2.92	0.0039

## Sheet: Table S8
Table S8: Differentially expressed miRNAs in response to inoculation with V. nonalfalfae and their target transcripts in hops. The cleavage sites within the hop transcripts were predicted on-line using psRNATarget Analysis Server (2017 Update).
miRNA ID	miRNA family	Target transcript (protein orthologue ID)	UniProt or STRING identifier of protein orthologue	Expectation (e-value)	UPE *	miRNA start	miRNA end	Target start	Target end	miRNA aligned fragment	alignment	Target aligned fragment	Inhibition	Multiplicity
hlu-miR160b	MIR160	Auxin response factor	A0A061FPV2	0	21.111	1	21	1616	1636	UGCCUGGCUCCCUGUAUGCCA	::::::::::::::::::::	AGGCAUACAGGGAGCCAGGCA	Cleavage	1
hlu-miR160b	MIR160	Auxin response factor	W9QUH2	0	12.154	1	21	286	306	UGCCUGGCUCCCUGUAUGCCA	:::::::::::::::::::	AAGCAUACAGGGAGCCAGGCA	Cleavage	1
hlu-miR160b	MIR160	Auxin response factor	W9S7Q7	0.5	20.567	1	21	243	263	UGCCUGGCUCCCUGUAUGCCA	::::::.::::::::::::::	UGGCAUGCAGGGAGCCAGGCA	Cleavage	1
hlu-miR156e	MIR156	Squamosa promoter-binding-like protein 15	W9RJ15 / GAAW01048142.1	1	18.71	1	20	1019	1038	UGACAGAAGAGAGUGAGCAC	:::::: :::::::::::::	GUGCUCUCUCUCUUCUGUCA	Cleavage	1
hlu-miR156e	MIR156	Squamosa promoter-binding-like protein 6	W9QNN5	1	10.483	1	20	757	776	UGACAGAAGAGAGUGAGCAC	:::::: :::::::::::::	GUGCUCUCUCUCUUCUGUCA	Cleavage	1
hlu-miR156e	MIR156	Squamosa promoter-binding-like protein 12	W9RS10	1	14.095	1	20	1176	1195	UGACAGAAGAGAGUGAGCAC	:::::: :::::::::::::	GUGCUCUCUCUCUUCUGUCA	Cleavage	1
hlu-miR156e	MIR156	Squamosa promoter-binding-like protein 7	W9R3S1	1	19.988	1	20	853	872	UGACAGAAGAGAGUGAGCAC	:::::: :::::::::::::	GUGCUCUCUCUCUUCUGUCA	Cleavage	1
hlu-miR156e	MIR156	Squamosa promoter-binding-like protein 12	W9RS10	1	18.72	1	20	58	77	UGACAGAAGAGAGUGAGCAC	:::::: :::::::::::::	GUGCUCUCUCUCUUCUGUCA	Cleavage	1
hlu-miR156e	MIR156	Squamosa promoter-binding-like protein 7	W9R3S1	1	19.988	1	20	93	112	UGACAGAAGAGAGUGAGCAC	:::::: :::::::::::::	GUGCUCUCUCUCUUCUGUCA	Cleavage	1
hlu-miR156e	MIR156	Squamosa promoter-binding-like protein 13	W9QLM6	1	20.596	1	20	200	219	UGACAGAAGAGAGUGAGCAC	:::::: :::::::::::::	GUGCUCUCUCUCUUCUGUCA	Cleavage	1
hlu-miR156e	MIR156	Squamosa promoter-binding protein 1	W9SN75	1	6.692	1	20	834	853	UGACAGAAGAGAGUGAGCAC	::::: :::::::::::::	AUGCUCUCUCUCUUCUGUCA	Cleavage	1
hlu-miR169m	MIR169	Nuclear transcription factor Y subunit A-10	W9SK30	1	21.035	1	23	1184	1206	UGAGCCAAGAAUGACUUGCCGGC	:::::: ::::::::::::::	AACGGCAACUCAUUCUUGGCUCA	Cleavage	1
hlu-miR171g	MIR171	Scarecrow-like protein	102107.XP_008238556.1	1	14.995	1	21	23	43	UUGAGCCGCGCCAAUAUCACU	:: ::::::::::::::::::	AGGGAUAUUGGCGCGGCUCAA	Cleavage	1
hlu-miR171g	MIR171	Scarecrow-like protein 6-like	57918.XP_004306953.1	1	14.699	1	21	1019	1039	UUGAGCCGCGCCAAUAUCACU	:: ::::::::::::::::::	AGAGAUAUUGGCGCGGCUCAA	Cleavage	1
hlu-miR171g	MIR171	GRAS domain-containing protein	A0A251QFM0	1	21.028	1	21	1435	1455	UUGAGCCGCGCCAAUAUCACU	:: ::::::::::::::::::	AGGGAUAUUGGCGCGGCUCAA	Cleavage	1
hlu-miR164b	MIR164	NAC domain-containing protein 100	W9QTW9	1	12.138	1	21	175	195	UGGAGAAGCAGGGCACGUGCA	:: ::::::::::::::::::	UGAACGUGCCCUGCUUCUCCA	Cleavage	1
hlu-miR319c	MIR319	Transcription factor GAMYB	W9QVM8	1.5	20.962	1	20	225	244	UUGGACUGAAGGGAGCUCCC	::::::::::::: :::::	UGGAGCUCCCUUCACUCCAA	Cleavage	1
hlu-miR169m	MIR169	Nuclear transcription factor Y subunit A-1	W9RR19	1.5	20.658	1	23	485	507	UGAGCCAAGAAUGACUUGCCGGC	: :::::: ::::::::::::.:	GGCGGCAAAUCAUUCUUGGCUUA	Cleavage	1
hlu-miR159c	MIR159	Putative anion transporter 3	W9RGS2	1.5	19.829	1	20	942	961	CUUGGAUUGAAGGGAGCUCC	:::::.:.::.::::::::	AGAGCUUCUUUUAAUCCAAG	Cleavage	1
miRNA-363	unknown	Polyphenol oxidase	W9S222	1.5	17.475	1	21	1239	1259	UCUCGACCAGCCGAGUAGAAA	::::::::::::::: :::::	UUUCUACUCGGCUGGACGAGA	Cleavage	1
hlu-miR164b	MIR164	NAC domain-containing protein	W9QCM5	1.5	13.457	1	21	546	566	UGGAGAAGCAGGGCACGUGCA	:::. :::::::::::::::	AGCAUUUGCCCUGCUUCUCCA	Cleavage	1
hlu-miR156e	MIR156	gag-polypeptide of LTR copia-type	3694.POPTR_0008s08210.1	2	17.095	1	20	14	33	UGACAGAAGAGAGUGAGCAC	:: :::.:.::::::::::	UUGGUCAUUUUCUUCUGUCA	Cleavage	1
hlu-miR828a	MIR828	Serine/threonine-protein phosphatase	W9QNS5	2	22.17	1	22	853	874	UCUUGCUCAAAUGAGUAUUCCA	:.:::: ::::::.::::::	CUGGAUACACAUUUGGGCAAGA	Cleavage	1
hlu-miR828a	MIR828	Nuclear pore membrane glycoprotein	W9S8T7	2	18.854	1	22	3988	4009	UCUUGCUCAAAUGAGUAUUCCA	: ::::::::::::..:::	CUCACUACUCAUUUGAGUGAGA	Cleavage	1
hlu-miR169a	MIR169	Nuclear transcription factor Y subunit A-8	W9QJW4	2	17.352	1	21	1116	1136	CAGCCAAGGAUGACUUGCCGG	: ::::: ::::::::::::	CGGGCAAAUCAUCCUUGGCUU	Cleavage	1
miRNA-898	unknown	L-threonine ammonia-lyase activity	161934.XP_010694863.1	2	4.111	1	23	516	538	AAUAAAGACUUUGGCUUGAUGGU	:: :: :::::::::::::::	CCCUUCUAGCCAAAGUCUUUAUC	Cleavage	1
hlu-miR156e	MIR156	Protein SCO1 homolog 2	225117.XP_009378785.1	2.5	14.255	1	20	1147	1166	UGACAGAAGAGAGUGAGCAC	::::::::::.:::: :.:	UUGCUCACUCUUUUCUUUUA	Cleavage	1
hlu-miR156e	MIR156	LOB domain-containing protein	W9SE87	2.5	13.423	1	20	177	196	UGACAGAAGAGAGUGAGCAC	: .::::::::::::::..	AUCUUCACUCUCUUCUGUUG	Cleavage	1
hlu-miR319c	MIR319	Teosinte branched 1, putative isoform 1	A0A061GDP3	2.5	20.474	1	20	3102	3121	UUGGACUGAAGGGAGCUCCC	::.: :::::::::::::	AGGGGGACCCUUCAGUCCAA	Cleavage	1
hlu-miR167a	MIR167	mediator of RNA polymerase II transcription subunit	102107.XP_008227322.1	2.5	18.245	1	21	446	466	UGAAGCUGCCAGCAUGAUCUA	::::::: ::::.:::::.	GCGAUCAUGGUGGCGGCUUCG	Cleavage	1
hlu-miR169m	MIR169	TATA-binding protein-associated factor	W9R0N8	2.5	15.251	1	23	284	306	UGAGCCAAGAAUGACUUGCCGGC	..::: :: :::::::::::.:	AUUGGCUAGGCAUUCUUGGCUUA	Cleavage	1
hlu-miR169m	MIR169	Exo84_C domain-containing protein	W9SE15	2.5	24.781	1	23	1014	1036	UGAGCCAAGAAUGACUUGCCGGC	:: :.::..:::::::::::	CUAGGAAGGUUGUUCUUGGCUCA	Cleavage	1
hlu-miR828a	MIR828	RNA polymerase II transcription regulator recruiting activity	3649.evm.model.supercontig_96.57	2.5	16.802	1	22	483	504	UCUUGCUCAAAUGAGUAUUCCA	:::::: :::::::: ::::::	UGGAAUUCUCAUUUGUGCAAGA	Cleavage	1
hlu-miR828a	MIR828	3-hydroxyisobutyryl-CoA hydrolase activity	A0A087GEK8	2.5	13.641	1	22	31	52	UCUUGCUCAAAUGAGUAUUCCA	::: ::..::::::.::::	AACAAUCCUUGUUUGAGUAAGA	Cleavage	1
hlu-miR408a	MIR408	Long chain acyl-CoA synthetase 8	W9QFE0	2.5	18.892	1	21	1899	1919	CAGGGAACAGACAGAGCAUGG	.::::: ::::::::::.:	GUAUGCUAUGUCUGUUCCUUA	Cleavage	1
hlu-miR171g	MIR171	NAD(P)-bd_dom domain-containing protein	M5VYK9	2.5	20.505	1	21	836	856	UUGAGCCGCGCCAAUAUCACU	::: :::::::: ::::::	UCUGAAAUUGGCGCAGCUCAA	Cleavage	1
hlu-miR159c	MIR159	Transcription factor GAMYB	W9QVM8	2.5	21.052	1	20	226	245	CUUGGAUUGAAGGGAGCUCC	::::::::::::: :::::	GGAGCUCCCUUCACUCCAAU	Cleavage	1
hlu-miR159c	MIR159	Integrase catalytic domain-containing protein	A0A087HSL5	2.5	15.713	1	20	167	186	CUUGGAUUGAAGGGAGCUCC	::::::::::::: ::::	UGAGCUCCCUUCAAGCCAAC	Cleavage	1
hlu-miR159c	MIR159	acetyltransferase At3g50280-like	M5VT21	2.5	17.6	1	20	479	498	CUUGGAUUGAAGGGAGCUCC	:::.:::.:::::::::.	CGAGUUCCUUUCAAUCCAGA	Cleavage	1
hlu-miR159c	MIR159	RNA polymerase II transcription regulator recruiting activity	102107.XP_008226955.1	2.5	15.855	1	20	1648	1667	CUUGGAUUGAAGGGAGCUCC	::::::::::::: ::::	CGAGCUCCCUUCAAGCCAAU	Cleavage	1
hlu-miR159c	MIR159	Cytochrome p450	57918.XP_004291627.1	2.5	20.372	1	20	190	209	CUUGGAUUGAAGGGAGCUCC	:.:::.:::::..:::.::	CGGGCUUCCUUCGGUCCGAG	Cleavage	1
hlu-miR169a	MIR169	ATPase	W9WDM0	2.5	22.73	1	21	22	42	CAGCCAAGGAUGACUUGCCGG	:.:::::::::::: :::::	CUGGCAAGUCAUCCAUGGCUC	Cleavage	1
hlu-miR169a	MIR169	Nuclear transcription factor Y subunit A-1	W9RR19	2.5	21.178	1	21	486	506	CAGCCAAGGAUGACUUGCCGG	:::::: ::::.:::::::	GCGGCAAAUCAUUCUUGGCUU	Cleavage	1
hlu-miR169a	MIR169	Nuclear transcription factor Y subunit A-10	W9SK30	2.5	21.347	1	21	1185	1205	CAGCCAAGGAUGACUUGCCGG	:::::: ::::.:::::::	ACGGCAACUCAUUCUUGGCUC	Cleavage	1
hlu-miR167f	MIR167	mediator of RNA polymerase II transcription subunit	102107.XP_008227322.1	2.5	18.245	1	21	446	466	UGAAGCUGCCAGCAUGAUCUU	::::::: ::::.:::::.	GCGAUCAUGGUGGCGGCUUCG	Cleavage	1
miRNA-363	unknown	ER lumen	F6HCQ4	2.5	22.01	1	21	134	154	UCUCGACCAGCCGAGUAGAAA	:::: .:.:::::::.::::	GUUCUCUUUGGCUGGUUGAGA	Cleavage	1
miRNA-363	unknown	Dynamin-related protein 4C	W9QQY9	2.5	15.986	1	21	685	705	UCUCGACCAGCCGAGUAGAAA	: ::.:::::.::::.::::	GUACUGCUCGGUUGGUUGAGA	Cleavage	1
miRNA-617	unknown	Wall-associated receptor kinase	F6GSN9	2.5	16.444	1	24	250	273	UGAGAAAUUGAAACUCCCACCUUC	:::::::::.:.:: ::::	UUUCCUGGGAGUUUUAGUUGCUCA	Cleavage	1
miRNA-617	unknown	DIS3-like exonuclease 2	W9QVR2	2.5	20.952	1	24	1024	1047	UGAGAAAUUGAAACUCCCACCUUC	:::::::::.: :::.:::	GAUACUGGGAGUUUUAUUUUUUCA	Cleavage	1
miRNA-898	unknown	gag-polypeptide of LTR copia-type	3750.XP_008361163.1	2.5	12.767	1	23	1	23	AAUAAAGACUUUGGCUUGAUGGU	.:: :: :.::::::::::::	UGUAUAAACCUAAAGUCUUUAUU	Cleavage	1
miRNA-898	unknown	Vacuolar protein sorting-associated protein 54	W9SA63	2.5	18.447	1	23	2193	2215	AAUAAAGACUUUGGCUUGAUGGU	:::.::::::: ::::.::	AGUCUCAGGCCAAAGCCUUUGUU	Cleavage	1
hlu-miR390a	MIR390	regulation of response to stimulus	218851.Aquca_1504_00001.1	2	18.854	1	21	556	576	AAGCUCAGGAGGGAUAGCACC	:: :::::.:::.::::::::	GGAGCUAUUCCUUCUGAGCUU	Cleavage	1
hlu-miR390a	MIR390	ARM repeat superfamily protein isoform 1	A0A061G6D5	2	15.523	1	21	366	386	AAGCUCAGGAGGGAUAGCACC	:::: ::.::.::::::::	AUUGCUUUCUCUUCUGAGCUU	Cleavage	1
hlu-miR390a	MIR390	Mitochondrial protein	3827.XP_004514187.1	2.5	8.771	1	21	395	415	AAGCUCAGGAGGGAUAGCACC	:::. :::.::.::::::::	CGUGUAAUCUCUUCUGAGCUU	Cleavage	1
hlu-miR390a	MIR390	Cation-transporting ATPase	W9RQ63	2.5	12.65	1	21	663	683	AAGCUCAGGAGGGAUAGCACC	::. ::::::::::::::	UCUGUGAUCCCUCCUGAGCUG	Cleavage	1
* Target accessibility-maximum energy to unpair the target site
